# Supplementary material for: High-yield and sustainable synthesis of quinoidal compounds assisted by keto–enol tautomerism
Source: Royal Society of Chemistry journal article supplement (doi:10.1039/d1sc01685g), 2021-01-01
Supplement: d1sc01685g1.pdf [file d1sc01685g1.pdf]

## High-Yield and Sustainable Synthesis of Quinoidal Compounds Assisted by Keto-Enol Tautomerism

Cheng Wang, Tian Du, Yunfeng Deng,\* Jiarong Yao, Riqing Li, Xuxia Zhao, Yu

Jiang, Haipeng Wei, Yanfeng Dang,\* Rongjin Li,\* and Yanhou Geng

### Table of contents

|                                                                                                            |    |
|------------------------------------------------------------------------------------------------------------|----|
| 1. General methods and materials.....                                                                      | 2  |
| 2. Organic field-effect transistors (OFETs) fabrication and measurements .....                             | 4  |
| 3. Synthetic procedures.....                                                                               | 4  |
| Solvent screening for the synthesis of compound <b>5a</b> .....                                            | 8  |
| Base screening for the synthesis of compound <b>5a</b> .....                                               | 9  |
| Pd source screening for the synthesis of compound <b>5a</b> .....                                          | 10 |
| General procedure for the synthesis of compounds <b>5a-5h</b> with <i>t</i> BuXPhos-Pd-G3 as catalyst..... | 11 |
| Synthesis of compound <b>5a</b> .....                                                                      | 12 |
| Synthesis of compound <b>5b</b> .....                                                                      | 13 |
| Synthesis of compound <b>5c</b> .....                                                                      | 14 |
| Synthesis of compound <b>5d</b> .....                                                                      | 15 |
| Synthesis of compound <b>5e</b> .....                                                                      | 16 |
| Synthesis of compound <b>5f</b> .....                                                                      | 16 |
| Synthesis of compound <b>5g</b> .....                                                                      | 17 |
| Synthesis of compound <b>5h</b> .....                                                                      | 18 |
| 4. NMR study of the coupling product .....                                                                 | 19 |
| 5. Supplementary Date.....                                                                                 | 20 |
| 6. X-ray crystallography .....                                                                             | 42 |
| 7. Cartesian coordinates (Å) and energies for the optimized structures .....                               | 44 |
| 8. References.....                                                                                         | 68 |

## 1. General methods and materials

$^1\text{H}$  NMR and  $^{13}\text{C}$  NMR spectra were measured on a Bruker 400 MHz spectrometer in chloroform-*d* ( $\text{CDCl}_3$ ) or dimethyl sulfoxide-*d*<sub>6</sub> ( $\text{DMSO-}d_6$ ) with tetramethylsilane (TMS) as internal standard at room temperature. The NMR spectra of compound **4** were measured using Low Pressure/Vacuum (LPV) NMR tube under argon. Multiplicities are reported as follows: singlet (s), doublet (d), doublet of doublets (dd), triplet (t), and multiplet (m). Matrix-assisted laser desorption ionization time-of-flight (MALDI-TOF) mass spectra were recorded on a Bruker/AutoflexIII Smartbean MALDI mass spectrometer with 2-[(2*E*)-3-(4-*tert*-butylphenyl)-2-methylprop-2-enylidene]malononitrile (DCTB) or 2-5-dihydroxybenzoic acid (DHB) as the matrix in a reflection mode. UV-*vis*-NIR absorption spectra were measured on a Shimadzu UV-3600 plus spectrometer. Solution spectra were measured in toluene and thin-films were prepared by spin-casting from their toluene solutions (5 mg/mL) on the quartz substrates. Optical bandgap were calculated from the onset of thin-film absorption spectrum according to the equation:  $E_g = 1240/\lambda_{\text{onset}}$  eV. Cyclic voltamograms (CV) were measured using a CHI660 electrochemical analyzer with a three-electrode cell at a scan rate of 100 mV s<sup>-1</sup>. Terabutylammonium hexafluorophosphate ( $\text{Bu}_4\text{NPF}_6$ , 0.1 mol L<sup>-1</sup>) was used as the supporting electrolyte in anhydrous dichloromethane. A Pt disk with 2 mm diameter, a Pt wire and a saturated calomel electrode (SCE) were used as working, counter and reference electrodes, respectively. The potential was calibrated against ferrocene/ferrocenium ( $\text{Fc}/\text{Fc}^+$ ) that was measured under the same conditions. The highest occupied molecular orbital energy level ( $E_{\text{HOMO}}$ ) and the lowest unoccupied molecular orbital energy level ( $E_{\text{LUMO}}$ ) were calculated according to the equations:

$$E_{\text{HOMO}} = -(4.80 + E_{\text{onset}}^{\text{ox}}) \text{ eV}; E_{\text{HOMO}} = -(4.80 + E_{\text{onset}}^{\text{re}}) \text{ eV}, \text{ in which } E_{\text{onset}}^{\text{ox}} \text{ and } E_{\text{onset}}^{\text{re}} \text{ represent the}$$

oxidation and reduction onset-potentials. EPR measurements were carried out at room temperature using a Bruker EMX plus 6/1 spectrometer. Cross-polarized optical microscope images were obtained with Nikon ECLIPSE Ci-POL polarized optical microscopes.

Geometry optimizations and frequency calculations were carried out using the B3LYP<sup>1-2</sup> functional and a mixed basis set of SDD<sup>3-4</sup> for Pd and Br and 6-31G(d) for other atoms. Frequency outcomes were examined to confirm stationary points as minima (no imaginary frequencies) or transition states (only one imaginary frequency). Because the M06-L<sup>5-6</sup> functional includes noncovalent interactions and can give more accurate energies for transition-metal systems, the energy were then refined by single-point calculations with M06-L and a mixed basis set of SDD for Pd and Br and 6-31++G(d,p) for other atoms, in which solvation energy corrections were calculated using the SMD<sup>7</sup> model in 1,4-dioxane. The combined use of two DFT functional has been successfully applied to investigate various catalytic reactions.<sup>8-17</sup> Free energies (kcal/mol) obtained in solution were discussed. All of the calculations were performed with Gaussian 09<sup>18</sup>.

Chemical reagents were purchased from Energy Chemical, Innochem or Aldrich, and used as received. All air and water sensitive reactions were performed under argon atmosphere. Tetrahydrofuran (THF) and toluene were distilled in standard method prior to use. Compounds **S1**<sup>19</sup>, **S3**<sup>20</sup> and **S5**<sup>21</sup> were prepared according to the references. Compounds **1a-1b** was purchased from Innochem, and compounds **S7**, **2e**, and **2f** were purchased from SunaTech Inc.

## 2. Organic field-effect transistor (OFET) devices fabrication and measurements

Top-gate and bottom-contact (TGBC) configuration OFETs were fabricated on bare Si/SiO<sub>2</sub> wafers. The substrate was first cleaned with deionized water, acetone and isopropanol in an ultrasonic bath and then dried under a nitrogen flow, followed by heating at 120 °C for 10 min. Gold source/drain electrodes were prepared by vacuum deposition through shadow mask to give a defined channel length ( $L = 50 \mu\text{m}$ ) and channel width ( $W = 5.6 \text{ mm}$ ). Subsequently, the active layers were deposited by spin-coating 5 mg/mL chloroform solution in an argon filled glove-box with 2000 rpm for 40 s, followed by annealing at 120 °C for 10 min. As the gate dielectric, CYTOP (Asahi Glass, type CTL-809M) was spin-cast at 2000 rpm for 120 s and annealed at 100 °C for 40 min. Finally, Al (~80 nm) was vacuum-evaporated as the gate electrode. OTFT devices were measured under ambient conditions with Keysight B1500A source/measure units. The mobility was extracted from the saturation region by using the equation of:  $I_{\text{DS}} = (\mu C_i W/2L)(V_{\text{GS}} - V_{\text{T}})^2$ , where  $W/L$  is the channel width/length,  $I_{\text{DS}}$  is the drain-source current,  $\mu$  is the field-effect mobility,  $C_i$  is the capacitance per unit area of the gate dielectric layer,  $V_{\text{GS}}$  and  $V_{\text{T}}$  are the gate voltage and threshold voltage, respectively.

## 3. Single crystal OFET devices fabrication and measurements

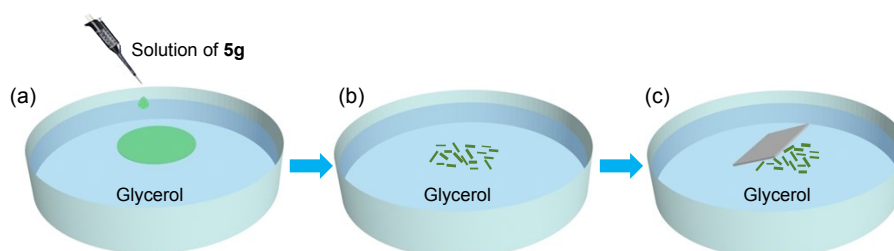

**Figure S1.** Schematic showing the growth and transfer of micro-wires.

Glass weighing bottles (75 mm×35 mm) were cleaned twice by ethanol and were used as the

containers to grow micro-wires of **5g**. 25 mL of glycerol was added into the glass weighing bottles as a liquid substrate. 50  $\mu\text{L}$  of **5g** solution ( $0.2 \text{ mg mL}^{-1}$  in toluene) was slowly dropped on the glycerol surface (Figure S1a) and then the glass weighing bottles were placed in a cabinet with constant temperature and humidity (temperature:  $15^\circ\text{C}$ , humidity: 30%). Micro-wires gradually appeared on the surface of glycerol. After the solvent evaporated completely, micro-wires of **5g** floating on the surface of glycerol were obtained (Figure S1b).  $\text{SiO}_2$  (300 nm)/Si wafers were used as the substrates for OFET devices fabrication. They were cleaned by sonification with deionized water, acetone and isopropanol for 10 min successively. Then the substrates were treated with oxygen plasma at 80 W for 15 min followed by modification with octadecyltrichlorosilane (OTS) by a vapor phase method. The OTS modified  $\text{SiO}_2$ /Si substrates were cleaned by sonification in chloroform, n-hexane and isopropanol, successively. The micro-wires of **5g** floating on the surface of glycerol were transferred to the OTS modified  $\text{SiO}_2$ /Si substrates by dipping the substrate upside-down and fishing the micro-wires out (Figure S1c). The  $\text{SiO}_2$ /Si substrate with micro-wires was gently rinsed by DI water to remove excess glycerol and dried. Bottom-gate/top-contact devices were fabricated on the  $\text{SiO}_2$ /Si substrate by stamping Au (80 nm) stripes on the micro-wires of **5g** as the source and drain electrodes. The OFET devices were measured using a Keithley 4200 SCS in ambient environment at room temperature. The mobility was extracted from the saturation region by using the equation of:  $I_{\text{DS}} = (\mu C_i W/2L)(V_{\text{GS}} - V_{\text{T}})^2$ , where  $I_{\text{DS}}$  is the drain-source current,  $\mu$  is the mobility,  $C_i$  is the capacitance per unit area of the gate dielectric layer,  $V_{\text{GS}}$  and  $V_{\text{T}}$  are the gate voltage and threshold voltage, L and W are the channel length and width basing on an individual micro-wire in OFET devices, respectively.

## 4. Synthetic procedures

### Synthesis of compound 2a

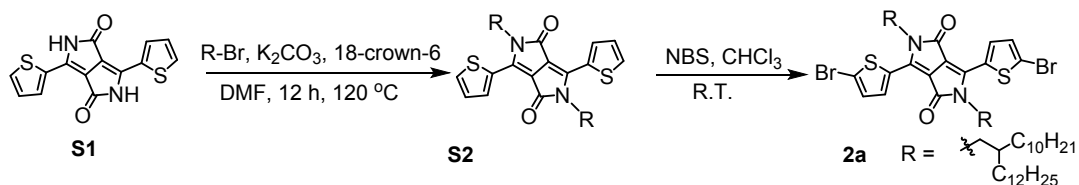

**Compound S2:** Compound **S1** (6.00 g, 19.98 mmol), anhydrous potassium carbonate (15.84 g, 59.93 mmol), 18-crown-6 (0.14 g, 1.00 mmol) and anhydrous DMF (200 mL) were added to a 500 mL three necked flask. The solution was stirred at 40 °C for 10 min, then 1-bromo-2-dodecyl-tetradecane (25.02 g, 59.93 mmol) was added dropwise. After stirring at 120 °C for 12 h, the solvent was removed under vacuum. The residue was dissolved in dichloromethane (CH<sub>2</sub>Cl<sub>2</sub>), washed with brine and dried anhydrous MgSO<sub>4</sub>. After removal of the solvent, the crude product was purified by chromatography on silica gel using petroleum ether (PE)/CH<sub>2</sub>Cl<sub>2</sub> = 2/1 (V/V) as the eluent, affording **S2** as a dark red solid in the yield of 33% (6.42 g). <sup>1</sup>H NMR (400 MHz, CDCl<sub>3</sub>, ppm): δ 8.87 (dd, *J*<sub>1</sub> = 4.0 MHz, *J*<sub>2</sub> = 1.2 MHz, 2H), 7.62 (dd, *J*<sub>1</sub> = 5.2 MHz, *J*<sub>2</sub> = 1.2 MHz, 2H), 7.27 (m, 2H), 4.02 (d, *J* = 7.6 MHz, 4H), 1.90 (m, 2H), 1.21 (m, 80 H), 0.87 (m, 12H).

**Compound 2a:** To the solution of **S2** (6.40 g, 6.57 mmol) in chloroform (240 mL), *N*-bromosuccinimide (NBS) (3.51 g, 19.72 mmol) was added slowly at 0 °C. The mixture was stirred at room temperature for overnight in the absence of light. After removal of the solvent, the crude product was purified by chromatography on silica gel using PE/CH<sub>2</sub>Cl<sub>2</sub> = 3/1 (V/V) as the eluent, affording compound **2a** as a dark purple solid in the yield of 80% (5.95 g). <sup>1</sup>H NMR (400 MHz, CDCl<sub>3</sub>, ppm): δ 8.63 (d, *J* = 4.0 MHz, 2H), 7.22 (d, *J* = 4.4 MHz, 2H), 3.93 (d, *J* = 8.0 MHz, 2H), 1.87 (m, 2H), 1.22 (m, 80H), 0.87 (m, 12H).

### Solvent screening for the synthesis of compound **5a**

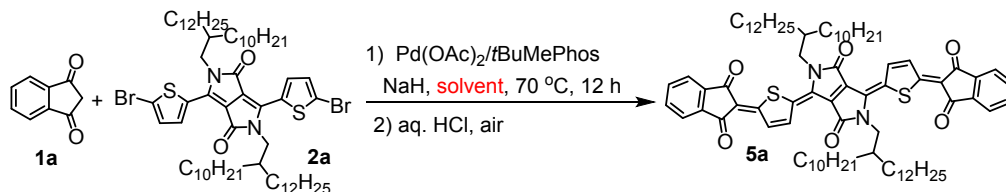

Compound **1a** (38.5 mg, 0.26 mmol), **2a** (140.8 mg, 0.12 mmol), Pd(OAc)<sub>2</sub> (0.56 mg, 2.49 μmol, 2 mol%), *t*BuMePhos (1.55 mg, 4.98 μmol, 4 mol%), sodium hydride (60% dispersion in mineral oil, 22.1 mg, 0.55 mmol) and anhydrous **solvent** (1.2 mL) were added in a schlenk tube. The mixture was stirred at 70 °C for 12 h in the absence of light, then the solvent was removed under vacuum. Subsequently, 15 mL HCl aqueous solution (0.05 M) was added, and the mixture was stirred in air for 10 min. The resulting precipitate was collected by filtration, and dissolved in CH<sub>2</sub>Cl<sub>2</sub>. After stirring in air for 20 min, the solution was washed with brine and dried by anhydrous MgSO<sub>4</sub>. The crude product was purified by chromatography on silica gel using CH<sub>2</sub>Cl<sub>2</sub> as the eluent.

**Table S1: Solvent screening for the synthesis of compound **5a****

| Entry | Cat.                 | Ligand            | Base | Solvent               | Temp. [°C] | Time [h] | Yield [%] <sup>a</sup> |
|-------|----------------------|-------------------|------|-----------------------|------------|----------|------------------------|
| 1     | Pd(OAc) <sub>2</sub> | <i>t</i> BuMePhos | NaH  | 1,4-dioxane           | 70         | 12       | 40                     |
| 2     | Pd(OAc) <sub>2</sub> | <i>t</i> BuMePhos | NaH  | THF                   | 70         | 12       | 30                     |
| 3     | Pd(OAc) <sub>2</sub> | <i>t</i> BuMePhos | NaH  | Toluene               | 110        | 12       | 10                     |
| 4     | Pd(OAc) <sub>2</sub> | <i>t</i> BuMePhos | NaH  | NMP                   | 70         | 12       | - <sup>b</sup>         |
| 5     | Pd(OAc) <sub>2</sub> | <i>t</i> BuMePhos | NaH  | DMAc                  | 70         | 12       | - <sup>b</sup>         |
| 6     | Pd(OAc) <sub>2</sub> | <i>t</i> BuMePhos | NaH  | DMAc:Dioxane<br>(1:1) | 70         | 12       | - <sup>b</sup>         |

<sup>a</sup>Isolated yield for compound **5a**; <sup>b</sup>No product.

### Base screening for the synthesis of compound 5a

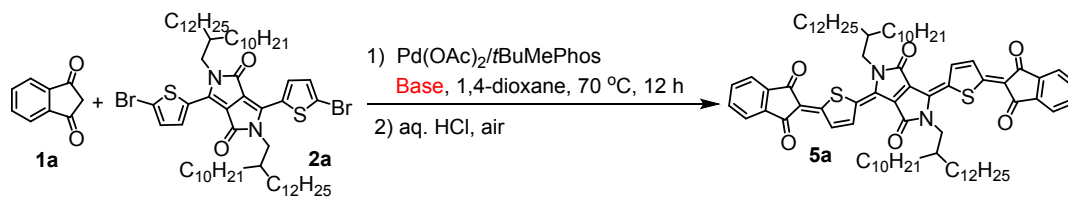

Compound **1a** (38.5 mg, 0.26 mmol), **2a** (140.8 mg, 0.12 mmol), Pd(OAc)<sub>2</sub> (0.56 mg, 2.49 μmol, 2 mol%), *t*BuMePhos (1.55 mg, 4.98 μmol, 4 mol%), **base** (0.55 mmol) and anhydrous 1,4-dioxane (1.2 mL) were added in a schlenk tube. The mixture was stirred at 70 °C for 12 h in the absence of light, then the solvent was removed under vacuum. Subsequently, 15 mL HCl aqueous solution (0.05 M) was added, and the mixture was stirred in air for 10 min. The resulting precipitate was collected by filtration, and dissolved in CH<sub>2</sub>Cl<sub>2</sub>. After stirring in air for 20 min, the solution was washed with brine and dried by anhydrous MgSO<sub>4</sub>. The crude product was purified by chromatography on silica gel using CH<sub>2</sub>Cl<sub>2</sub> as the eluent.

**Table S2. Base screening for the synthesis of compound 5a.**

| Entry | Cat.                 | Ligand            | Base                            | Solvent     | Temp. [°C] | Time [h] | Yield [%] <sup>a</sup> |
|-------|----------------------|-------------------|---------------------------------|-------------|------------|----------|------------------------|
| 1     | Pd(OAc) <sub>2</sub> | <i>t</i> BuMePhos | NaH                             | 1,4-dioxane | 70         | 12       | 40                     |
| 2     | Pd(OAc) <sub>2</sub> | <i>t</i> BuMePhos | K <sub>3</sub> PO <sub>4</sub>  | 1,4-dioxane | 70         | 12       | 18                     |
| 3     | Pd(OAc) <sub>2</sub> | <i>t</i> BuMePhos | NaO <sup>t</sup> Bu             | 1,4-dioxane | 70         | 12       | 5                      |
| 4     | Pd(OAc) <sub>2</sub> | <i>t</i> BuMePhos | NaHMDS                          | 1,4-dioxane | 70         | 12       | - <sup>b</sup>         |
| 5     | Pd(OAc) <sub>2</sub> | <i>t</i> BuMePhos | CS <sub>2</sub> CO <sub>3</sub> | 1,4-dioxane | 70         | 12       | 10                     |
| 6     | Pd(OAc) <sub>2</sub> | <i>t</i> BuMePhos | Et <sub>3</sub> N               | 1,4-dioxane | 70         | 12       | - <sup>b</sup>         |
| 7     | Pd(OAc) <sub>2</sub> | <i>t</i> BuMePhos | Pyridine                        | 1,4-dioxane | 70         | 12       | - <sup>b</sup>         |

<sup>a</sup>Isolated yield for compound **5a**; <sup>b</sup>No product.



### Pd source screening for the synthesis of compound **5a**

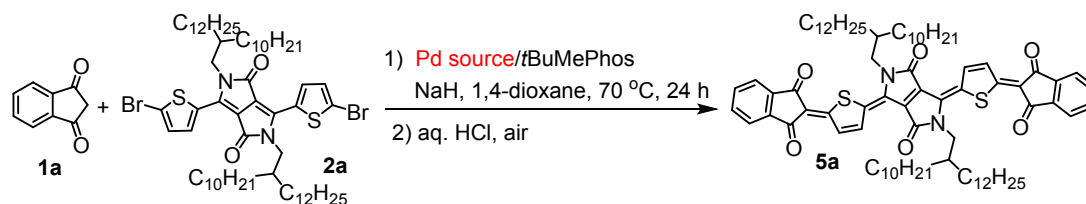

Compound **1a** (38.5 mg, 0.26 mmol), **2a** (140.8 mg, 0.12 mmol), **Pd source** (2 mol%), *t*BuMePhos (1.55 mg, 4.98  $\mu$ mol, 4 mol%), sodium hydride (60% dispersion in mineral oil, 22.1 mg, 0.55 mmol) and anhydrous 1,4-dioxane (1.2 mL) were added in a schlenk tube. The mixture was stirred at 70 °C for 12 h in the absence of light, then the solvent was removed under vacuum. Subsequently, 15 mL HCl aqueous solution (0.05 M) was added, and the mixture was stirred in air for 10 min. The resulting precipitate was collected by filtration, and dissolved in CH<sub>2</sub>Cl<sub>2</sub>. After stirring in air for 20 min, the solution was washed with brine and dried by anhydrous MgSO<sub>4</sub>. The crude product was purified by chromatography on silica gel using CH<sub>2</sub>Cl<sub>2</sub> as the eluent.

**Table S3: Pd source screening for the synthesis of compound **5a****

| Entry | Cat.                               | Ligand            | Base  | Solvent     | Temp. [°C] | Time [h] | Yield [%] <sup>a</sup> |
|-------|------------------------------------|-------------------|-------|-------------|------------|----------|------------------------|
| 1     | Pd(OAc) <sub>2</sub>               | <i>t</i> BuMePhos | NaH   | 1,4-dioxane | 70         | 12       | 40                     |
| 2     | Pd(PPh <sub>3</sub> ) <sub>4</sub> | <i>t</i> BuMePhos | NaH H | 1,4-dioxane | 70         | 12       | - <sup>b</sup>         |
| 3     | Herrmann                           | <i>t</i> BuMePhos | NaH   | 1,4-dioxane | 70         | 12       | 11                     |
| 4     | Pd <sub>2</sub> (dba) <sub>3</sub> | <i>t</i> BuMePhos | NaH   | 1,4-dioxane | 70         | 12       | 17                     |

<sup>a</sup>Isolated yield for compound **5a**; <sup>b</sup>No product.

**General procedure for the synthesis of compounds 5a-5h with *t*BuXPhos-Pd-G3 as catalyst**

Compound **1a-1b** (2.2 equiv), **2a-2g** (1.0 equiv), *t*BuXPhos-Pd-G3 (2 mol%), sodium hydride (60% dispersion in mineral oil, 4.6 equiv) and anhydrous 1,4-dioxane (0.1 mmol ml<sup>-1</sup>) were added in a schlenk tube. The mixture was stirred at 70 °C for 12 h in the absence of light, then the solvent was removed under vacuum. Subsequently, 15 mL HCl aqueous solution (0.05 M) was added, and the mixture was stirred in air for 10 min. The resulting precipitate was collected by filtration, and dissolved in CH<sub>2</sub>Cl<sub>2</sub>. After stirring in air for 20 min, the solution was washed by brine and dried with anhydrous MgSO<sub>4</sub>. The crude product was purified by chromatography on silica gel to afford the corresponding product.

### Synthesis of compound 5a

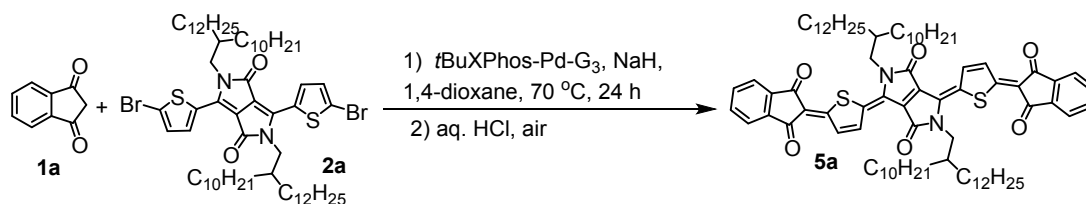

Compound **5a** was obtained from **1a** (38.5 mg, 0.26 mmol) and **2a** (140.0 mg, 0.12 mmol) as a blue solid following the general procedure (141.8 mg, yield: 91%; eluent: CH<sub>2</sub>Cl<sub>2</sub>). <sup>1</sup>H NMR (400 MHz, CDCl<sub>3</sub>, ppm): δ 9.49 (d, *J* = 5.6 MHz, 2H), 8.43 (d, *J* = 5.6 MHz), 7.86 (m, 4H), 7.65 (m, 4H), 4.15 (d, *J* = 7.6 MHz, 4H), 2.07 (m, 2H), 1.21 (m, 80H), 0.84 (m, 12H). <sup>13</sup>C NMR (100 MHz, CDCl<sub>3</sub>, ppm): δ 189.48, 186.79, 161.59, 158.89, 145.79, 141.55, 141.11, 134.55, 134.50, 134.42, 134.39, 133.47, 132.64, 122.86, 122.45, 119.45, 47.32, 38.24, 31.94, 31.92, 31.02, 30.17, 29.76, 29.74, 29.70, 29.67, 29.40, 29.38, 26.11, 22.68, 14.08. HRMS (MALDI-TOF): calcd for C<sub>80</sub>H<sub>110</sub>N<sub>2</sub>O<sub>6</sub>S<sub>2</sub> [M]<sup>+</sup>: 1258.7805, found: 1258.7843.

### Synthesis of compound 2b

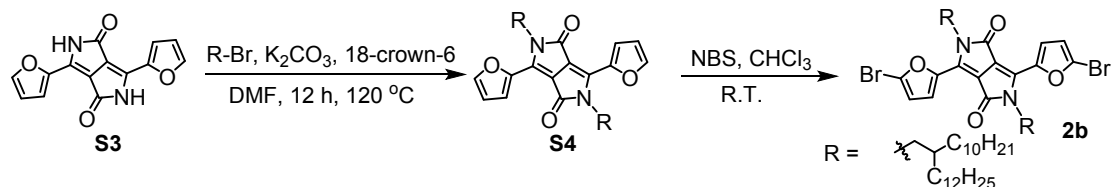

**Compound S4:** Compound **S4** was obtained from **S3** (200 mg, 0.75 mmol) as a red solid following the same procedure as **S2** (315.9 mg, yield: 45%). <sup>1</sup>H NMR (400 MHz, CDCl<sub>3</sub>, ppm): δ 8.33 (d, *J* = 3.6 MHz, 2H), 7.68 (m, 2H), 7.27 (m, 2H), 4.03 (d, *J* = 7.6 MHz, 4H), 1.79 (m, 2H), 1.22 (m, 80 H), 0.87 (m, 12H).

**Compound 2b:** Compound **2b** was obtained from **S4** (300.0 mg, 0.32 mmol) as a dark red solid following the same procedure as **2a** (241.5 mg, yield: 69%). <sup>1</sup>H NMR (400 MHz, CDCl<sub>3</sub>, ppm): δ 8.30 (d, *J* = 3.6 MHz, 2H), 6.62 (d, *J* = 3.6 MHz, 2H), 3.99 (d, *J* = 7.2 MHz, 2H), 1.77 (m, 2H),

1.22 (m, 80H), 0.87 (m, 12H).

### Synthesis of compound 5b

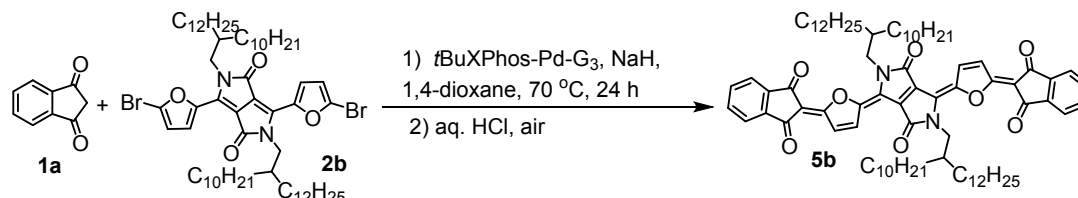

Compound **5b** was obtained from **1a** (38.5 mg, 0.26 mmol) and **2b** (135.0 mg, 0.12 mmol) as a blue solid following the general procedure (134.2 mg, yield: 89%; eluent: CH<sub>2</sub>Cl<sub>2</sub>). <sup>1</sup>H NMR (400 MHz, CDCl<sub>3</sub>, ppm): δ 9.02 (d, *J* = 5.6 MHz, 2H), 8.04 (d, *J* = 5.6 MHz, 2H), 7.90 (m, 4H), 7.74 (m, 4H), 4.38 (d, *J* = 7.6 MHz, 4H), 1.92 (m, 2H), 1.18 (m, 80 H), 0.84 (m, 12H). <sup>13</sup>C NMR (100 MHz, CDCl<sub>3</sub>, ppm): δ 188.99, 186.59, 164.94, 160.80, 145.03, 141.79, 141.40, 138.28, 134.72, 134.56, 134.24, 126.75, 122.51, 122.42, 121.57, 108.51, 47.66, 37.94, 31.89, 30.45, 30.04, 29.69, 29.65, 29.61, 29.34, 26.34, 22.65, 14.07. HRMS (MALDI-TOF): calcd for C<sub>80</sub>H<sub>110</sub>N<sub>2</sub>O<sub>8</sub> [M]<sup>+</sup>: 1226.8262, found: 1226.8284.

### Synthesis of compound 2c

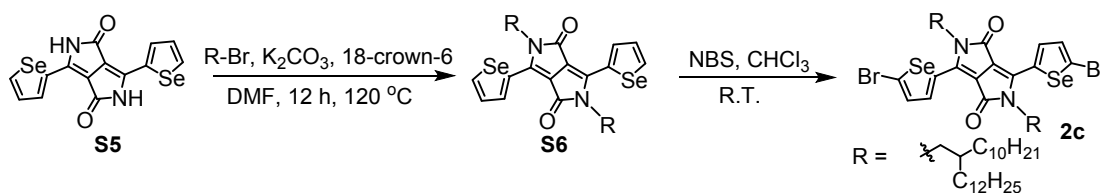

**Compound S6:** Compound **S6** was obtained from **S5** (500 mg, 1.27 mmol) as a red solid following the same procedure as **S2** (378.0 mg, yield: 28%). <sup>1</sup>H NMR (400 MHz, CDCl<sub>3</sub>, ppm): δ 8.82 (dd, *J*<sub>1</sub> = 4.0 MHz, *J*<sub>2</sub> = 0.8 MHz, 2H), 8.38 (dd, *J*<sub>1</sub> = 5.6 MHz, *J*<sub>2</sub> = 0.8 MHz, 2H), 7.48 (m, 2H), 3.97 (d, *J* = 7.6 MHz, 4H), 1.91 (m, 2H), 1.21 (m, 80 H), 0.87 (m, 12H).

**Compound 2c:** Compound **2c** was obtained from **S6** (350.0 mg, 0.33 mmol) as a dark red solid following the same procedure as **2a** (301.3 mg, yield: 75%). <sup>1</sup>H NMR (400 MHz, CDCl<sub>3</sub>, ppm): δ

8.40 (d,  $J = 4.4$  MHz, 2H), 7.40 (d,  $J = 4.0$  MHz, 2H), 3.89 (d,  $J = 8.0$  MHz, 2H), 1.88 (m, 2H), 1.21 (m, 80H), 0.88 (t,  $J = 6.4$  MHz, 12H).

### Synthesis of compound 5c

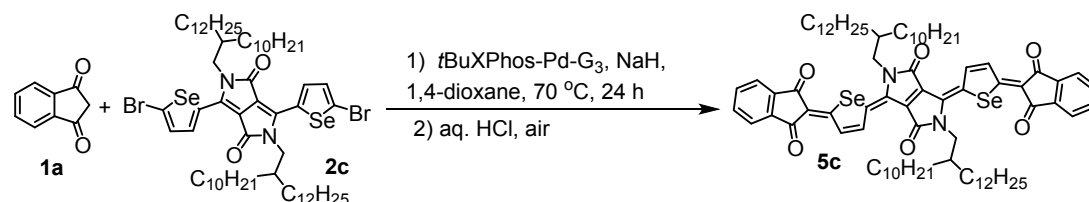

Compound **5c** was obtained from **1a** (38.5 mg, 0.26 mmol) and **2c** (151.0 mg, 0.12 mmol) as a dark blue solid following the general procedure (158.5 mg, yield: 95%; eluent:  $\text{CH}_2\text{Cl}_2$ ).  $^1\text{H}$  NMR (400 MHz,  $\text{CDCl}_3$ , ppm):  $\delta$  9.61 (d,  $J = 6.0$  MHz, 2H), 8.43 (d,  $J = 6.4$  MHz, 2H), 7.84 (m, 4H), 7.64 (m, 4H), 4.07 (d,  $J = 8.0$  MHz, 4H), 2.07 (m, 2H), 1.21 (m, 80 H), 0.83 (m, 12H).  $^{13}\text{C}$  NMR (100 MHz,  $\text{CDCl}_3$ , ppm):  $\delta$  190.33, 186.07, 162.28, 161.94, 148.71, 141.37, 140.92, 137.55, 135.68, 134.62, 134.33, 133.93, 133.20, 123.06, 122.52, 122.03, 122.01, 47.18, 38.20, 31.92, 31.91, 31.02, 30.10, 29.75, 29.69, 29.39, 29.37, 26.08, 22.67, 14.08. HRMS (MALDI-TOF): calcd for  $\text{C}_{80}\text{H}_{110}\text{N}_2\text{O}_6\text{Se}_2$   $[\text{M}]^+$ : 1354.6694, found: 1354.6741.

### Synthesis of compound 2d

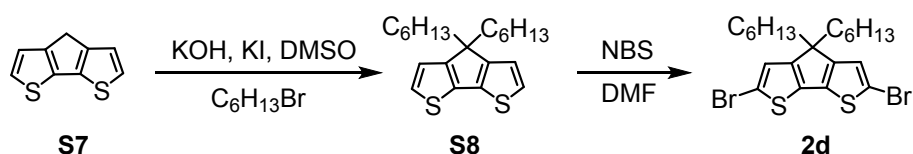

**Compound S8:** To the solution of **S7** (200.0 mg 1.12 mmol) in anhydrous DMSO (5 mL), KI (5.6 mg, 0.034 mmol) and KOH (188.8 mg 3.37 mmol) were added. After stirring at room temperature for 1 h, 1-bromohexane (555.6mg 3.37 mmol) was added. The mixture was stirred at room temperature for overnight, then poured into water, and extracted with ether. The organic layer was washed with brine and dried with anhydrous  $\text{MgSO}_4$ . After removal of the solvent, the crude

product was purified by chromatography on silica gel using PE as the eluent, affording compound **S8** as a yellow oil (330.5 mg, yield: 85%). <sup>1</sup>H NMR (400 MHz, CDCl<sub>3</sub>, ppm): δ 7.15 (d, *J* = 4.8 MHz, 2H), 6.93 (d, *J* = 4.8 MHz, 2H), 1.82 (m, 4H), 1.13 (m, 12H), 0.94 (m, 4 H), 0.81 (t, *J* = 6.8 MHz, 6H).

**Compound 2d:** To the solution of **S8** (300.0 mg, 0.86 mmol) in DMF (8 mL), NBS (323.5 mg, 1.82 mmol) was added in one portion. The mixture was stirred at room temperature for 12 h in the absence of light, then poured into water and extracted with ether. The organic layer was washed with brine and dried with anhydrous MgSO<sub>4</sub>. After removal of the solvent, the crude product was purified by chromatography on silica gel using PE as the eluent, affording compound **2d** as a yellow oil (375.5 mg, yield: 86%). <sup>1</sup>H NMR (400 MHz, CDCl<sub>3</sub>, ppm): δ 6.93 (s, 2H), 1.75 (m, 4H), 1.13 (m, 12H), 0.90 (m, 4 H), 0.83 (t, *J* = 6.8 MHz, 6H).

### Synthesis of compound 5d

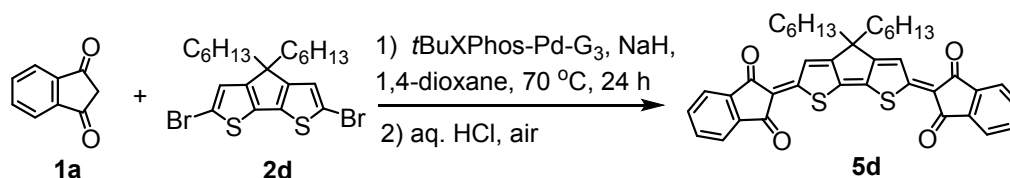

Compound **5d** was obtained from **1a** (76.5 mg, 0.52 mmol) and **2d** (120.0 mg, 0.24 mmol) as a purple solid following the general procedure (128.0 mg, yield: 85%; eluent: PE/DCM = 1/3). <sup>1</sup>H NMR (400 MHz, CDCl<sub>3</sub>, ppm): δ 8.02 (s, 2H), 7.93 (m, 4H), 7.76 (m, 4H), 1.98 (m, 4H), 1.18 (m, 12 H), 1.06 (m, 4H), 0.81 (m, 6H).

### Synthesis of compound 5e

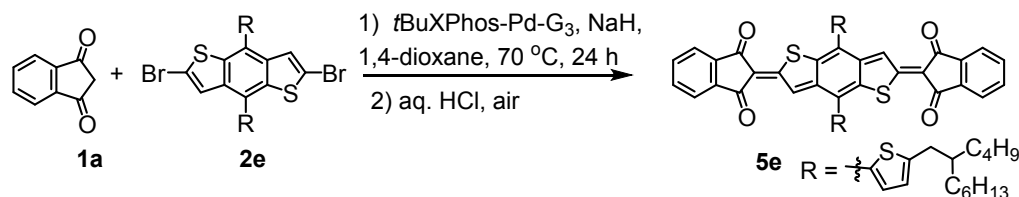

Compound **5e** was obtained from **1a** (75.7 mg, 0.31 mmol) and **2e** (120.0 mg, 0.14 mmol) as a dark blue solid following the general procedure (118.8 mg, yield: 86%; eluent: PE/CH<sub>2</sub>Cl<sub>2</sub> = 1/3).

<sup>1</sup>H NMR (400 MHz, CDCl<sub>3</sub>, ppm): δ 8.77 (s, 2H), 7.80 (m, 4H), 7.53 (m, 4H), 7.41 (d, *J* = 3.6 MHz, 4H), 6.94 (d, *J* = 3.2 MHz, 4H), 2.91 (d, *J* = 6.8 MHz, 2H), 1.78 (m, 2 H), 1.39 (m, 32H), 0.96 (m, 12 H). <sup>13</sup>C NMR (100 MHz, CDCl<sub>3</sub>, ppm): δ 189.68, 186.92, 157.32, 148.83, 146.82, 144.06, 141.48, 141.18, 134.41, 134.16, 133.63, 133.29, 131.01, 128.71, 126.33, 122.78, 122.20, 39.90, 34.83, 33.36, 32.97, 32.00, 29.74, 28.89, 26.69, 23.08, 22.72, 14.25, 14.26. HRMS (MALDI-TOF): calcd for C<sub>60</sub>H<sub>64</sub>O<sub>4</sub>S<sub>4</sub> [M]<sup>+</sup>: 976.3721, found: 976.3710.

### Synthesis of compound 5f

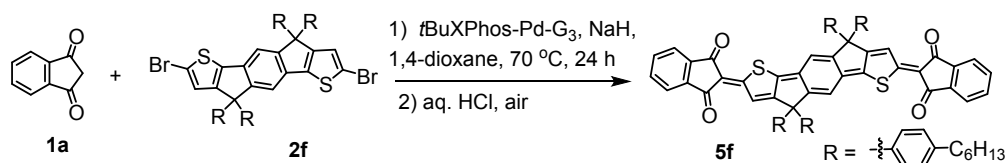

Compound **5f** was obtained from **1a** (41.7 mg, 0.29 mmol) and **2f** (140.0 mg, 0.13 mmol) as a purple solid following the general procedure (142.3 mg, yield: 92%; eluent: PE/DCM = 1/1). <sup>1</sup>H NMR (400 MHz, CDCl<sub>3</sub>, ppm): δ 8.17 (s, 2H), 7.84 (m, 4H), 7.67 (m, 4H), 7.15 (M, 18 H), 2.59 (t, *J* = 7.6 MHz, 8H), 1.59 (m, 8 H), 1.31 (m, 24H), 0.87 (t, *J* = 6.8 MHz, 12H).

### Synthesis of compound 2g

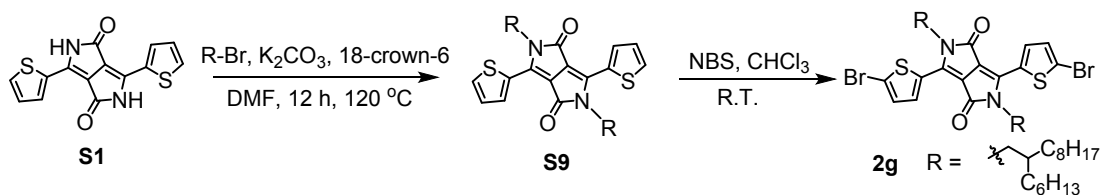

**Compound S9:** Compound **S9** was obtained from **S1** (500 mg, 1.66 mmol) as a red solid following the same procedure as **S2** (475 mg, yield: 38%). <sup>1</sup>H NMR (400 MHz, CDCl<sub>3</sub>, ppm): δ 8.87 (d, *J* = 2.8 MHz, 2H), 7.62 (d, *J* = 4.8 MHz, 2H), 7.27 (m, 2H), 4.03 (d, *J* = 8.0 MHz, 4H), 1.90 (m, 2H), 1.21 (m, 80 H), 0.84 (m, 12H).

**Compound 2g:** Compound **2g** was obtained from **S9** (400.0 mg, 0.53 mmol) as a dark red solid following the same procedure as **2a** (411.4 mg, yield: 85%). <sup>1</sup>H NMR (400 MHz, CDCl<sub>3</sub>, ppm): δ 8.62 (d, *J* = 4.0 MHz, 2H), 7.22 (d, *J* = 4.0 MHz, 2H), 3.93 (d, *J* = 8.0 MHz, 2H), 1.88 (m, 2H), 1.22 (m, 80H), 0.86 (m, 12H).

### Synthesis of compound 5g

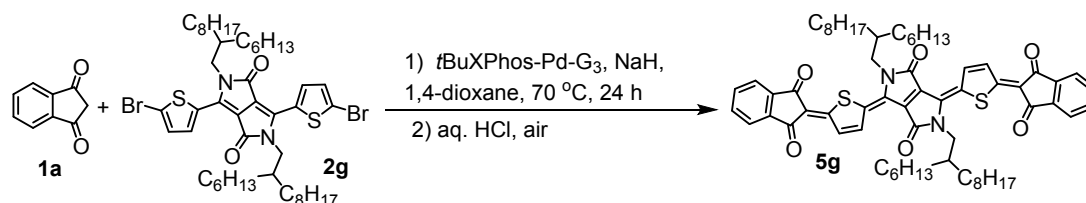

Compound **5g** was obtained from **1a** (46.1 mg, 0.31 mmol) and **2g** (130.0 mg, 0.14 mmol) as a dark blue solid following the general procedure (133.6 mg, yield: 90%; eluent: DCM). <sup>1</sup>H NMR (400 MHz, CDCl<sub>3</sub>, ppm): δ 9.45 (d, *J* = 5.6 MHz, 2H), 8.37 (d, *J* = 12.8 MHz), 7.82 (m, 4H), 7.60 (m, 4H), 4.12 (d, *J* = 7.6 MHz, 4H), 2.04 (m, 2H), 1.29 (m, 48H), 0.83 (m, 12H).



## Synthesis of compound 5h

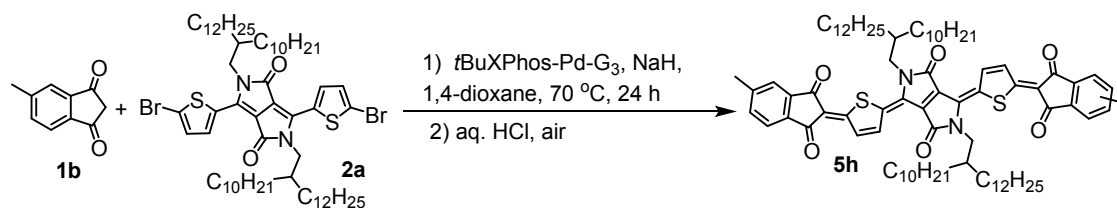

Compound **5h** was obtained from **1b** (46.7 mg, 0.29 mmol) and **2a** (150.0 mg, 0.013 mmol) as a blue solid following the general procedure (147.1 mg, yield: 86%; eluent: DCM). <sup>1</sup>H NMR (400 MHz, CDCl<sub>3</sub>, ppm): δ 9.45 (dd, *J*<sub>1</sub> = 6.0 MHz, *J*<sub>2</sub> = 1.2 MHz, 2H), 8.36 (t, *J* = 5.2 MHz, 2H), 7.72 (dd, *J*<sub>1</sub> = 7.6 MHz, *J*<sub>2</sub> = 4.0 MHz, 2H), 7.62 (s, 2H), 7.40 (dd, *J*<sub>1</sub> = 11.2 MHz, *J*<sub>2</sub> = 8.0 MHz, 2H), 4.12 (d, *J* = 7.6 MHz, 4H), 2.42 (d, *J* = 11.6 MHz, 6H), 2.04 (m, 2H), 1.21 (m, 80H), 0.83 (m, 12H). <sup>13</sup>C NMR (100 MHz, CDCl<sub>3</sub>, ppm): δ 189.53, 189.19, 186.86, 186.56, 161.56, 158.25, 146.14, 145.95, 145.52, 141.95, 141.50, 139.41, 139.00, 135.37, 135.31, 133.21, 133.54, 123.10, 122.83, 122.69, 122.42, 119.88, 99.95, 47.23, 38.24, 31.92, 30.96, 30.19, 29.77, 29.71, 29.42, 29.40, 26.08, 22.69, 22.08, 14.11. HRMS (MALDI-TOF): calcd for C<sub>82</sub>H<sub>114</sub>N<sub>2</sub>O<sub>6</sub>Se<sub>2</sub> [M]<sup>+</sup>: 1286.8118, found: 1286.8085.

## 5. NMR study of the coupling product

Compound **1a** (38.5 mg, 0.26 mmol), **2a** (140 mg, 0.12 mmol), *t*BuXPhos-Pd-G3 (2.0 mg, 2.47  $\mu$ mol, 2 mol%), sodium hydride (60% dispersion in mineral oil, 22.1 mg, 0.55 mmol) and anhydrous 1,4-dioxane (1.2 mL) were added in a schlenk tube. The mixture was stirred at 70 °C for 12 h in the absence of light, then the solvent was removed under vacuum. Subsequently, 15 mL HCl aqueous solution (0.05 M, degassed) was added, and the mixture was stirred for 10 min. The resulting precipitate was collected by filtration under argon, and then dried by argon flow. After that, 5 mg of the solid was transferred to a LPV-NMR tube in an argon-filled glovebox.

## 6. Supplementary Date

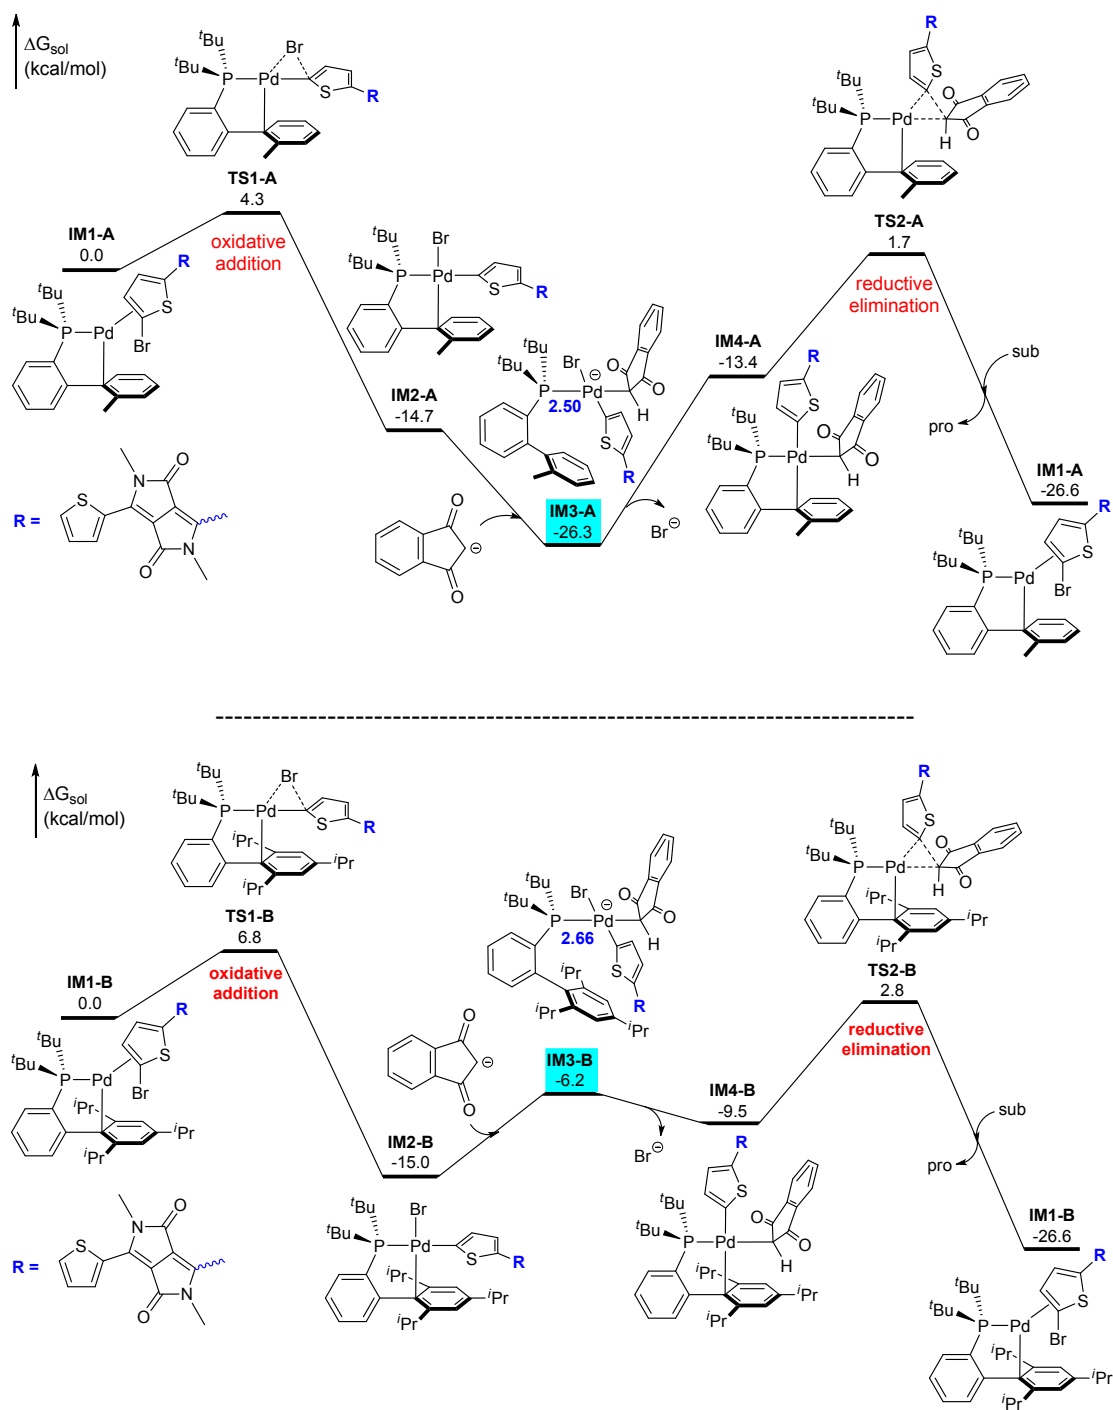

**Figure S2.** Free-energy profiles for the coupling of **1a** and **2a** with *t*BuMePhos (top) and *t*BuXPhos (bottom) as the ligand.

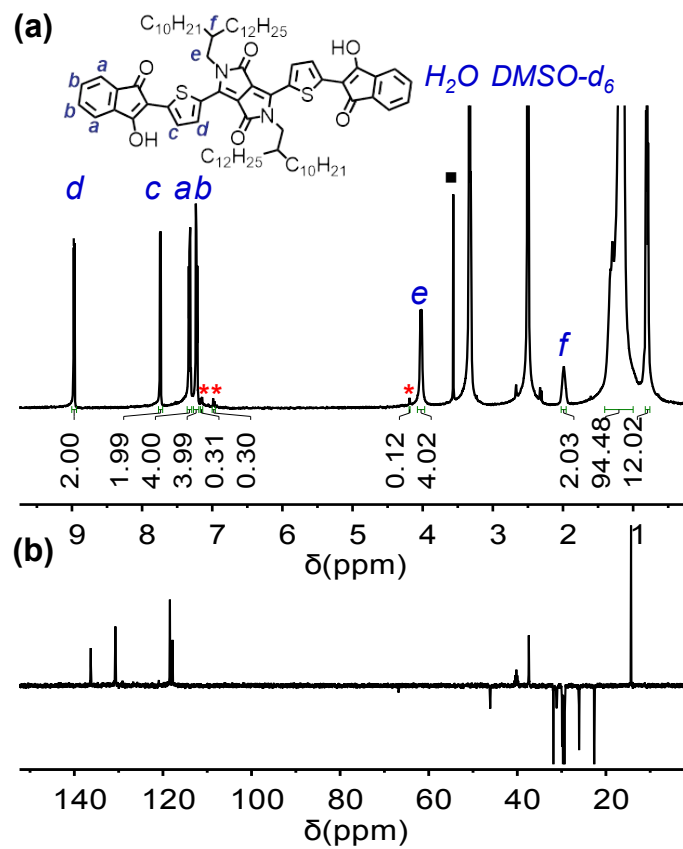

**Figure S3.**  $^1\text{H}$  NMR (a) and  $^{13}\text{C}$  DEPT-135 NMR (b) spectra of compound 4 in  $\text{DMSO-d}_6$ ; (■) signal for 1,4-dioxane; (\*) signal for the residual indandione.

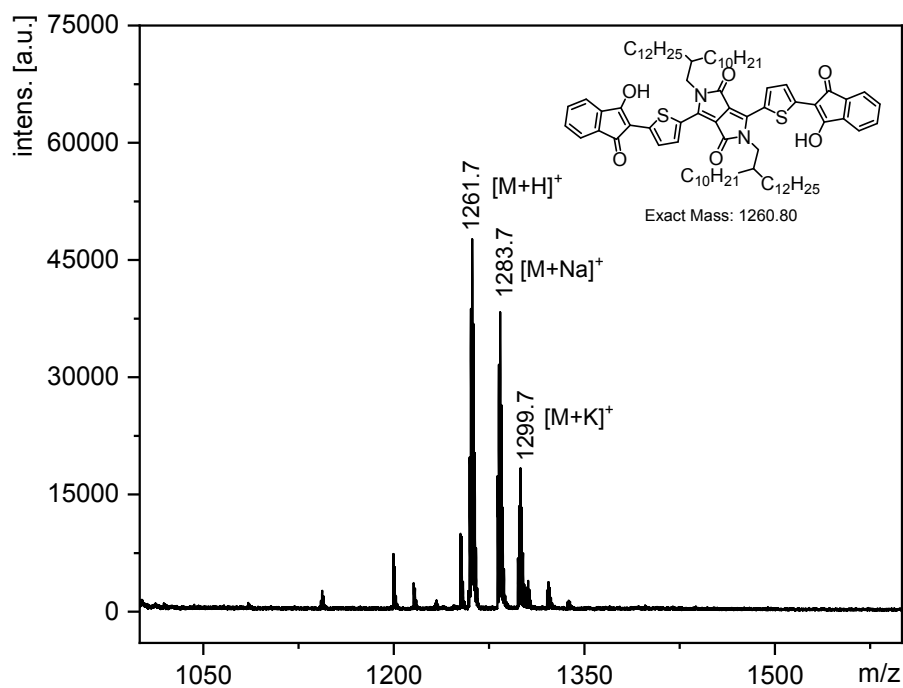

**Figure S4.** MALDI-TOF mass spectrum of compound **4**.

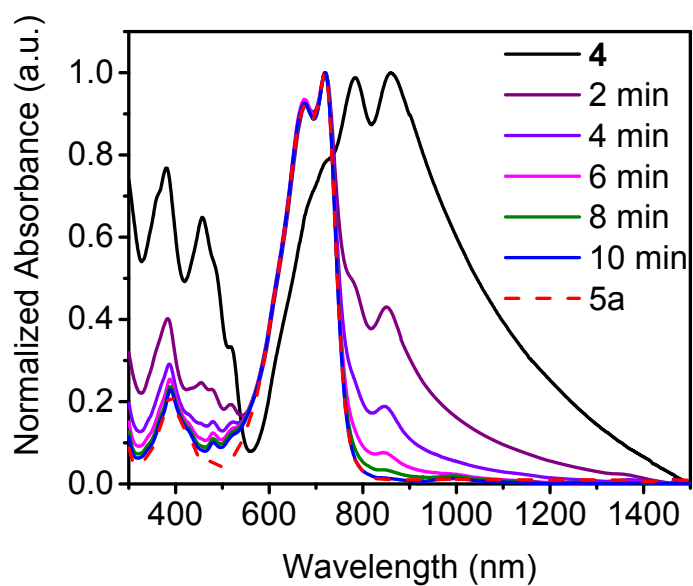

**Figure S5.** Time dependence of UV-vis-NIR spectra of compound **4** in solution ( $\text{CH}_2\text{Cl}_2$ ,  $1 \times 10^{-5}$  mol  $\text{L}^{-1}$ ) under bubbling air with the irradiation of UV light (254 nm).

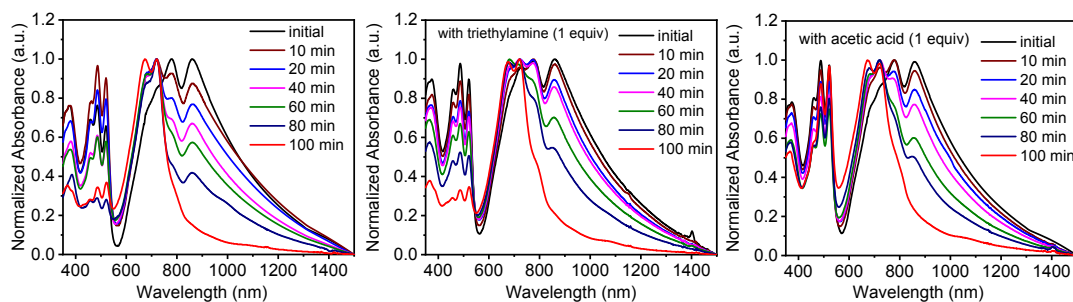

**Figure S6.** The oxidation process of compound **4** by electrochemical method under argon monitored by solution UV-vis-NIR absorption (in  $\text{CH}_2\text{Cl}_2$ ,  $1 \times 10^{-5}$  mol  $\text{L}^{-1}$ ).

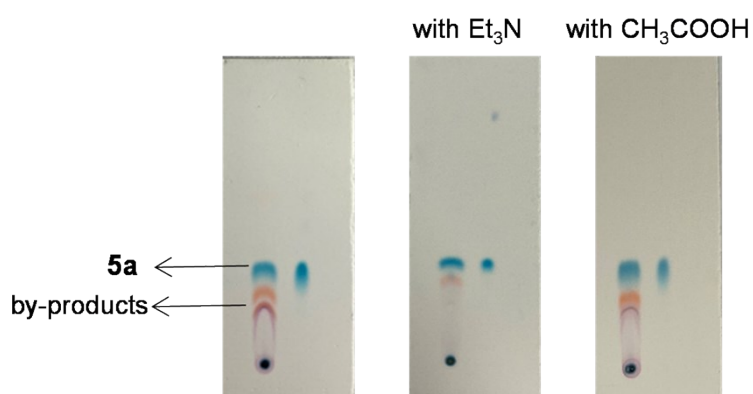

**Figure S7.** Thin layer chromatography analysis of electrochemical oxidation of compound **4**.

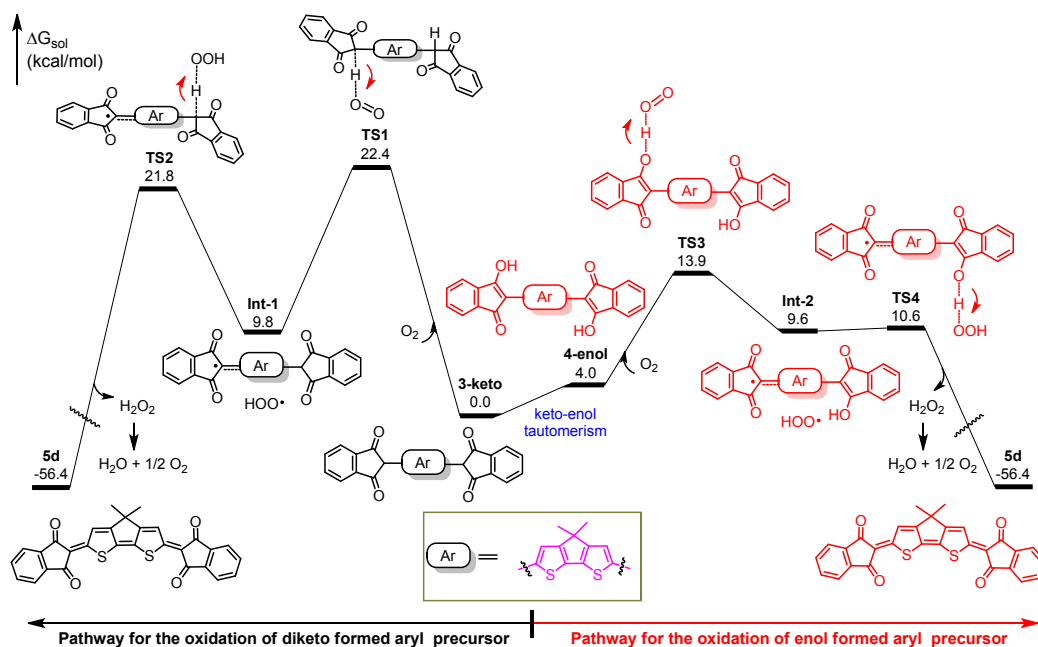

**Figure S8.** Free energy profiles for the formation of compound **5d**.

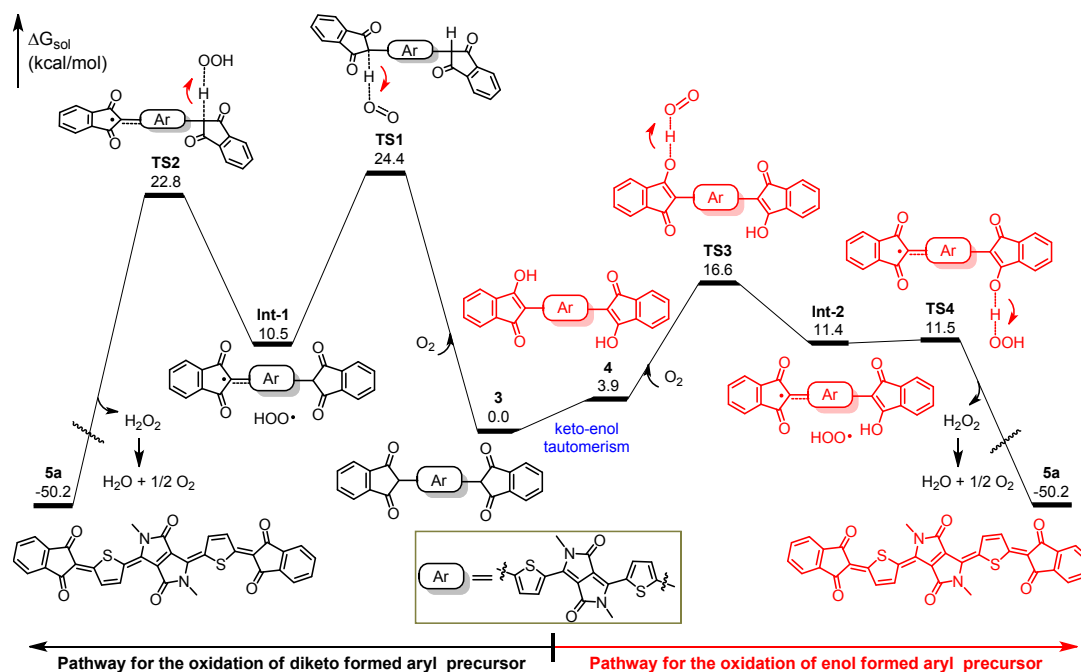

**Figure S9.** Free-energy profiles for the oxidation of intermediates **3** and **4** to give quinoid **5a** obtained from M06L/SMD-6-31++G(d,p)//M06L-6-31G(d,p) calculations.

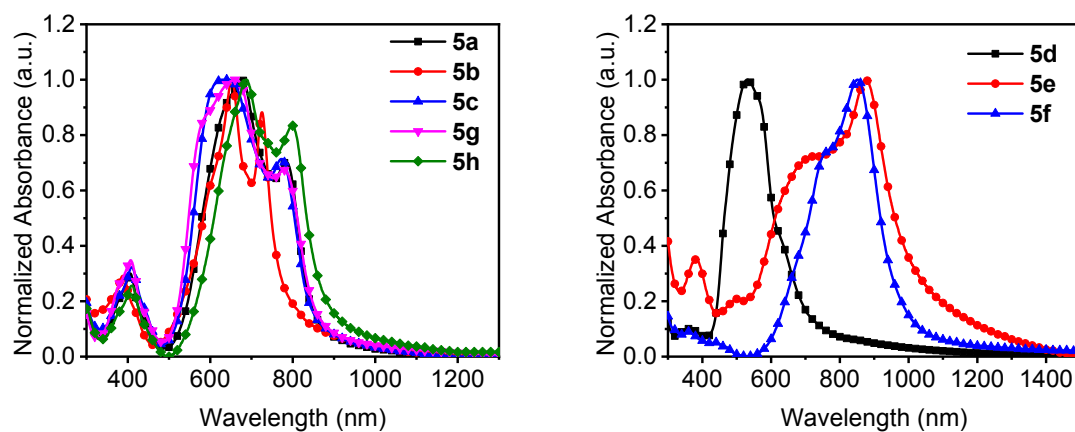

**Figure S10.** Thin-film absorption spectra of **5a-5h**.

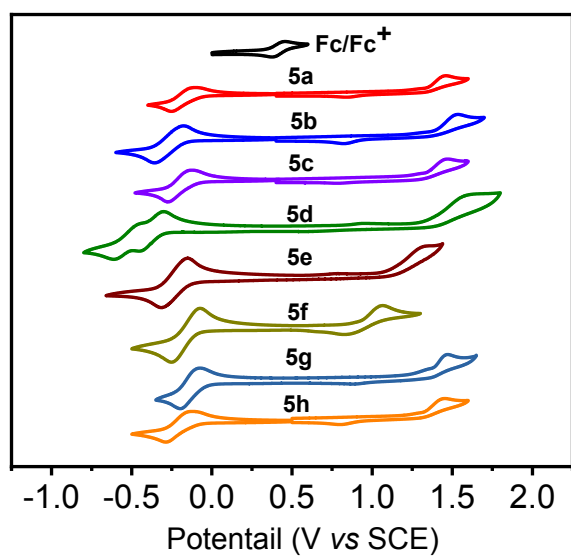

**Figure S11.** Solution cyclic voltammograms (CVs) of **5a-5h**.



**Table S4. Optical and electrochemical properties of 5a-5h.**

| Compound  | $\lambda_{max}^{sol}$ [nm] <sup>a</sup> | $\lambda_{max}^{film}$ [nm] <sup>b</sup> | $E_g$ [eV] <sup>c</sup> | $E_{LUMO}$ [eV] <sup>d</sup> | $E_{HOMO}$ [eV] <sup>d</sup> |
|-----------|-----------------------------------------|------------------------------------------|-------------------------|------------------------------|------------------------------|
| <b>5a</b> | 721, 679                                | 783, 676                                 | 1.45                    | -4.33                        | -5.74                        |
| <b>5b</b> | 675, 641                                | 725, 652                                 | 1.60                    | -4.23                        | -5.81                        |
| <b>5c</b> | 715, 673                                | 773, 637                                 | 1.42                    | -4.32                        | -5.69                        |
| <b>5d</b> | 610, 562, 522                           | 530                                      | 1.91                    | -4.06                        | -5.73                        |
| <b>5e</b> | 661, 611                                | 877, 710                                 | 1.26                    | -4.22                        | -5.62                        |
| <b>5f</b> | 790, 727                                | 851, 761                                 | 1.32                    | -4.29                        | -5.29                        |
| <b>5g</b> | 721, 679                                | 779, 660                                 | 1.45                    | -4.32                        | -5.74                        |
| <b>5h</b> | 721, 680                                | 799, 688                                 | 1.43                    | -4.27                        | -5.68                        |

<sup>a</sup>In toluene solution. <sup>b</sup>Thin-films were prepared by spin-casting from toluene solutions on the quartz substrates <sup>c</sup>Calculated from the onset of thin-film absorption according to the equation of  $E_g^{opt} = 1240/\lambda_{onset}$ . <sup>d</sup>The highest occupied molecular orbital (HOMO) and the lowest unoccupied molecular orbital (LUMO) energy levels were calculated according to the equation of  $E_{HOMO} = -(4.80 + E_{onset}^{ox})$  eV and  $E_{LUMO} = -(4.80 + E_{onset}^{red})$  eV, in which  $E_{onset}^{ox}$  and  $E_{onset}^{red}$  represent the oxidation and reduction onset-potentials.

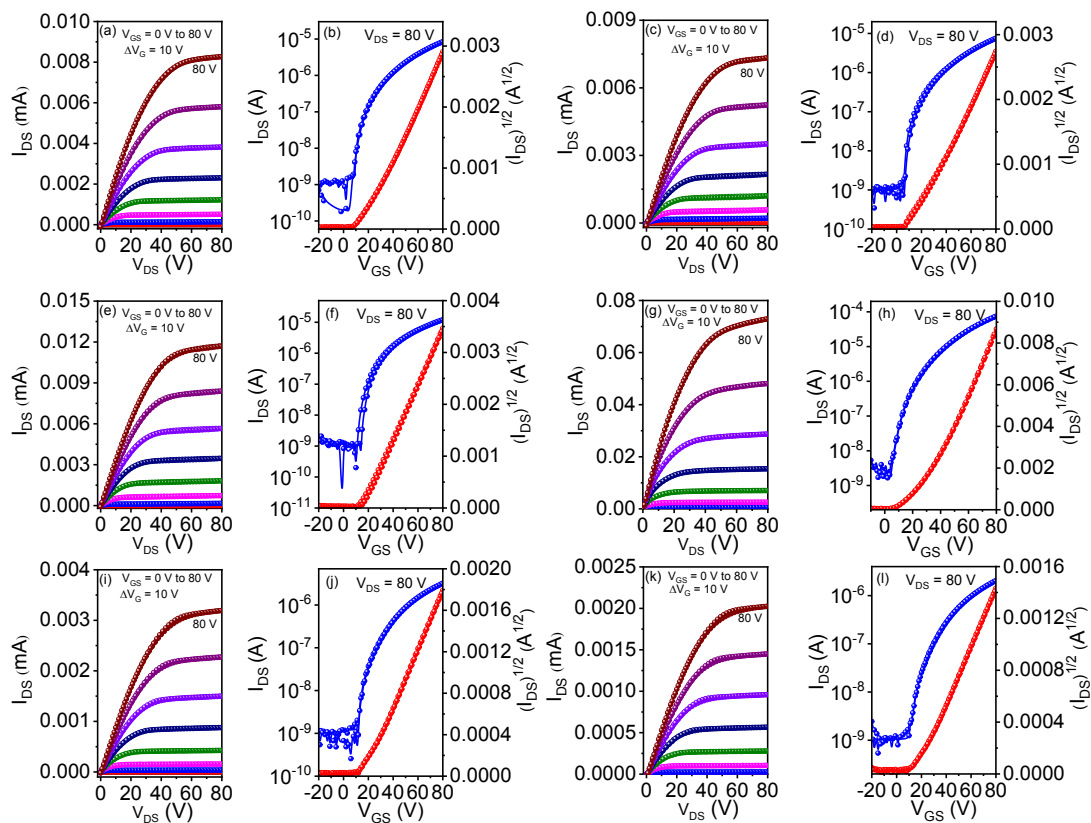

**Figure S12.** Output (a, c, e, g, i, k) and transfer (b, d, f, h, j, l) curves of the TGBC OFETs based on **5a** (a, b), **5b** (c, d), **5c** (e, f), **5f** (g, h), **5g** (i, j) and **5h** (k, l).

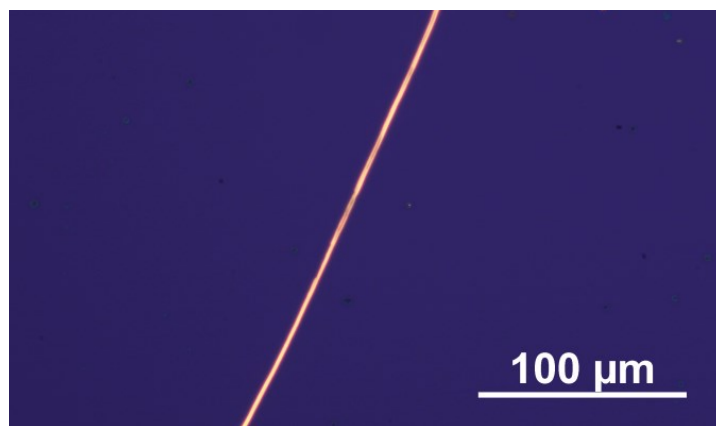

**Figure S13.** The cross-polarized optical micrograph of the micro-wire of compound **5g** with rotation of 45°.

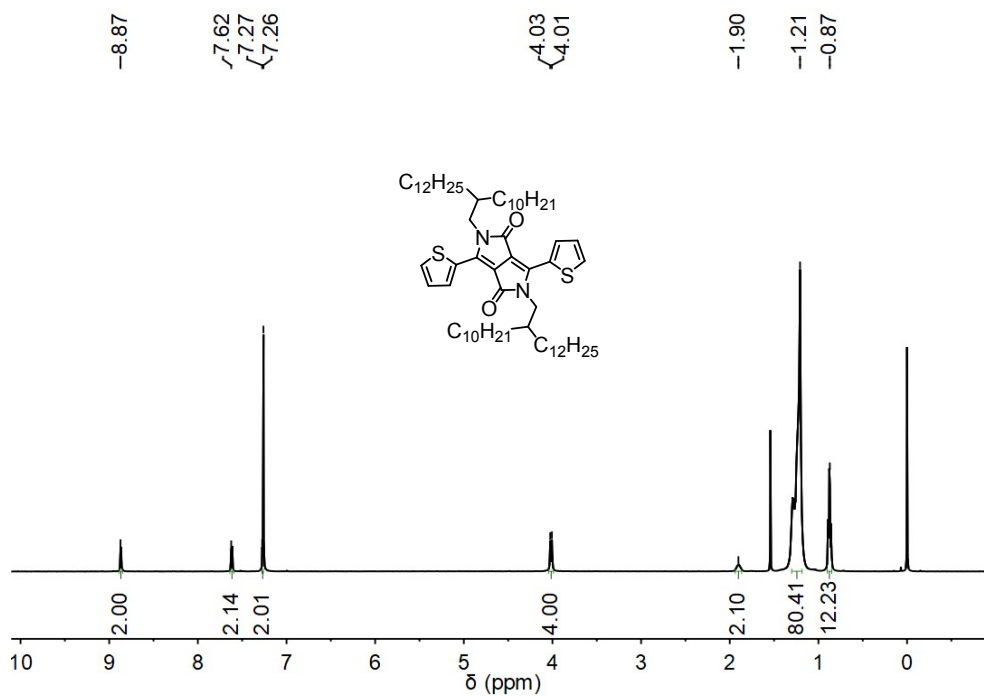

**Figure S14.**  $^1\text{H}$  NMR spectrum of compound S2 (400 MHz,  $\text{CDCl}_3$ ).

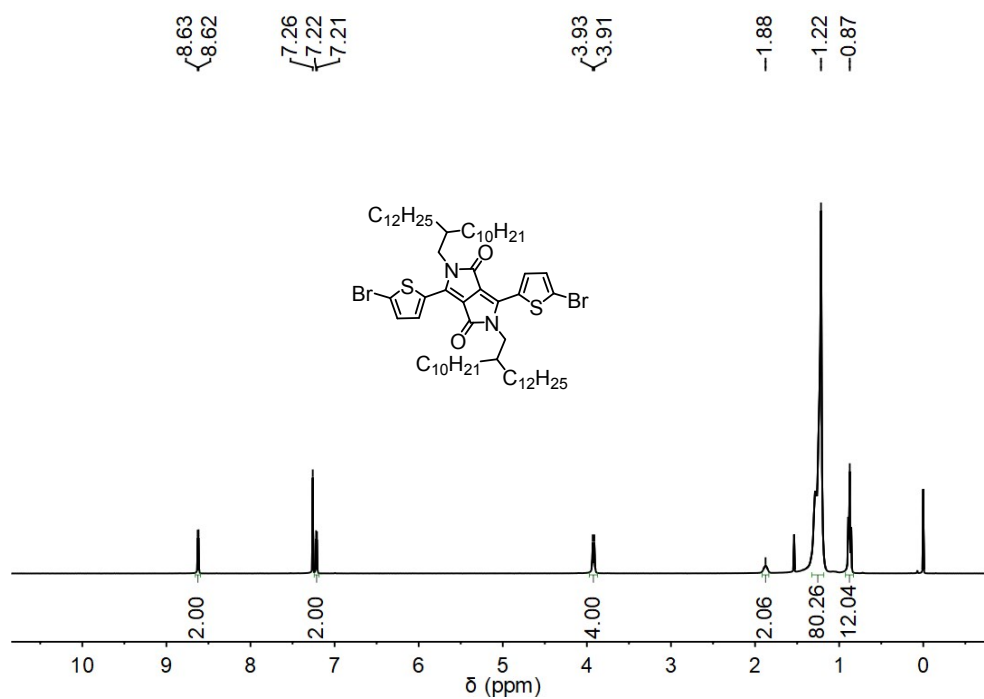

**Figure S15.**  $^1\text{H}$  NMR spectrum of compound 2a (400 MHz,  $\text{CDCl}_3$ ).

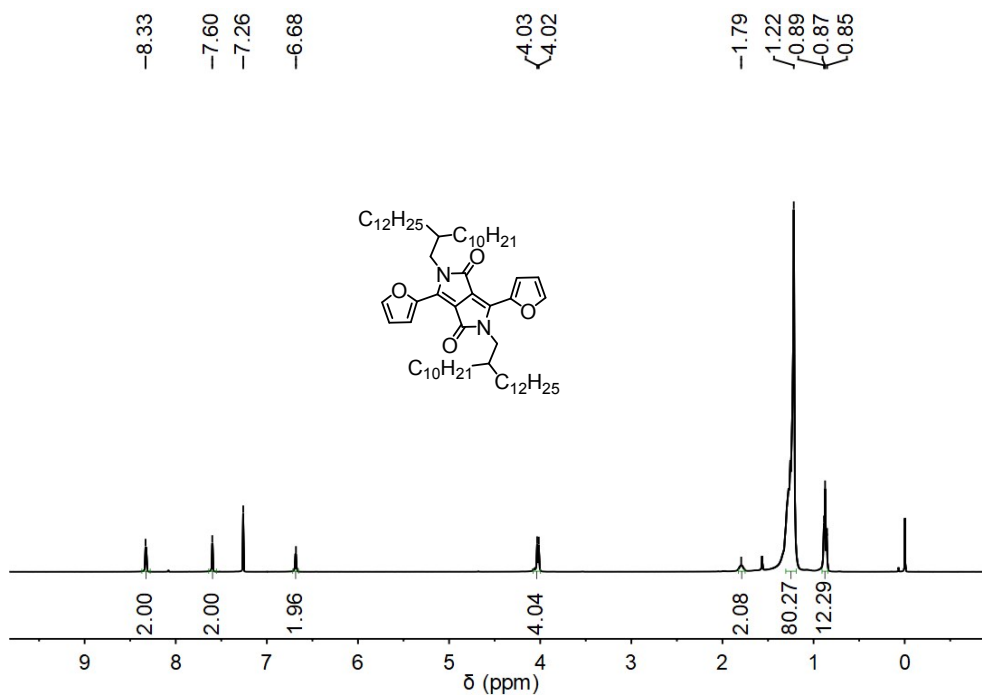

**Figure S16.** <sup>1</sup>H NMR spectrum of compound **S4** (400 MHz, CDCl<sub>3</sub>).

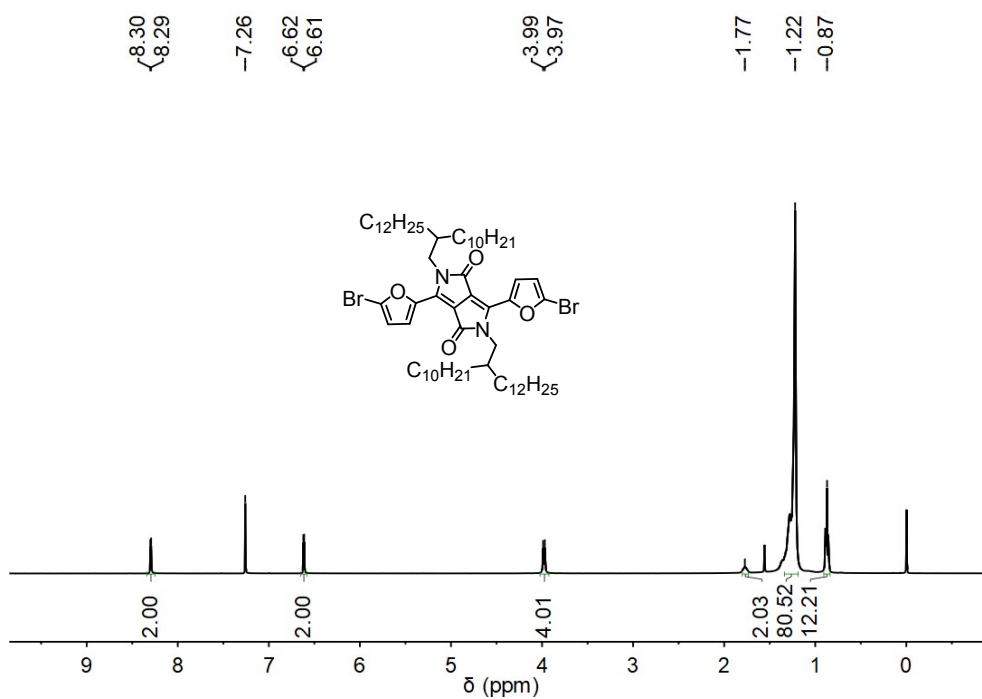

**Figure S17.** <sup>1</sup>H NMR spectrum of compound **2b** (400 MHz, CDCl<sub>3</sub>).

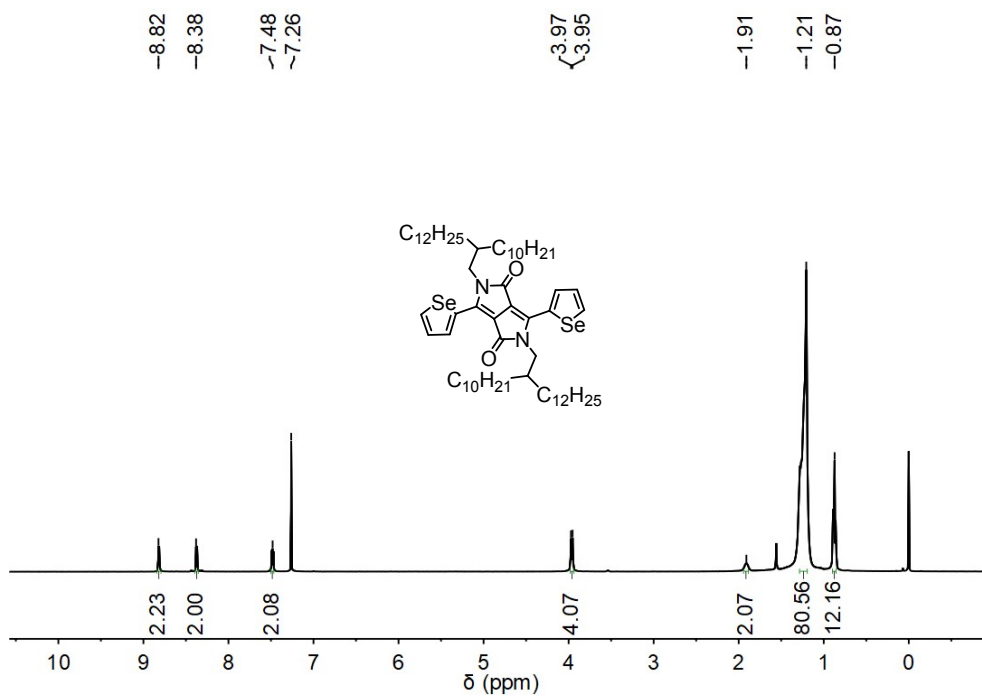

**Figure S18.**  $^1\text{H}$  NMR spectrum of compound S6 (400 MHz,  $\text{CDCl}_3$ ).

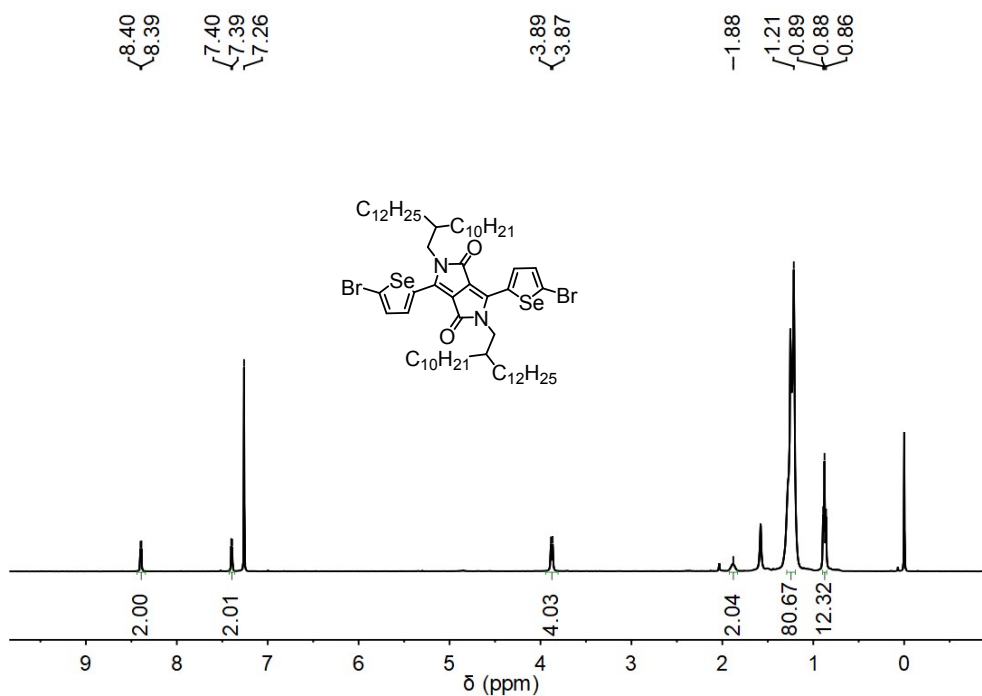

**Figure S19.**  $^1\text{H}$  NMR spectrum of compound 2c (400 MHz,  $\text{CDCl}_3$ ).

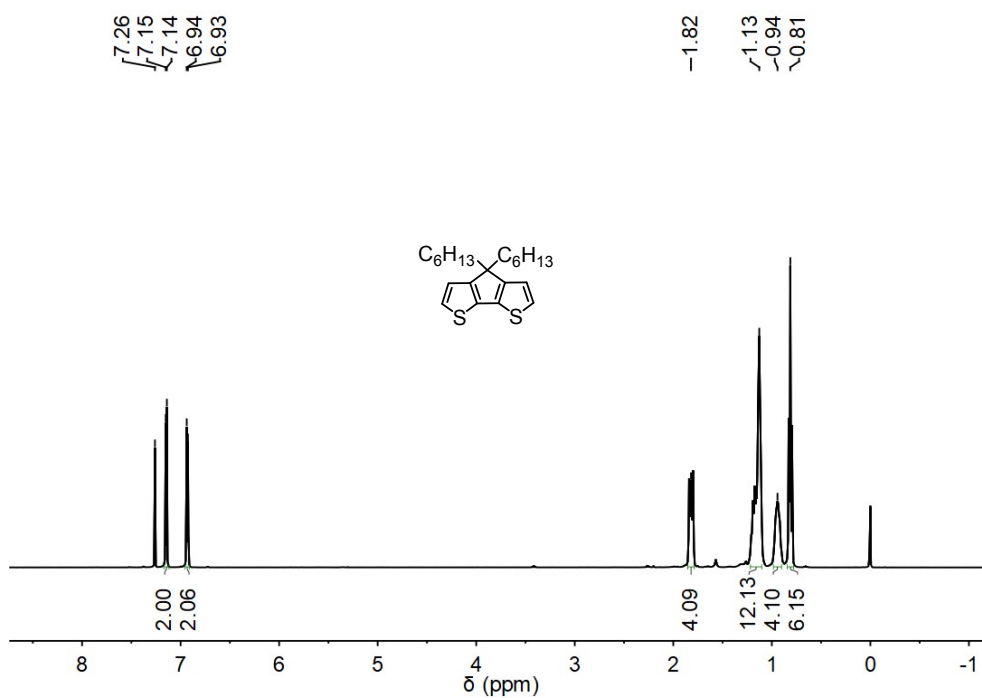

**Figure S20.**  $^1\text{H}$  NMR spectrum of compound **S8** (400 MHz,  $\text{CDCl}_3$ ).

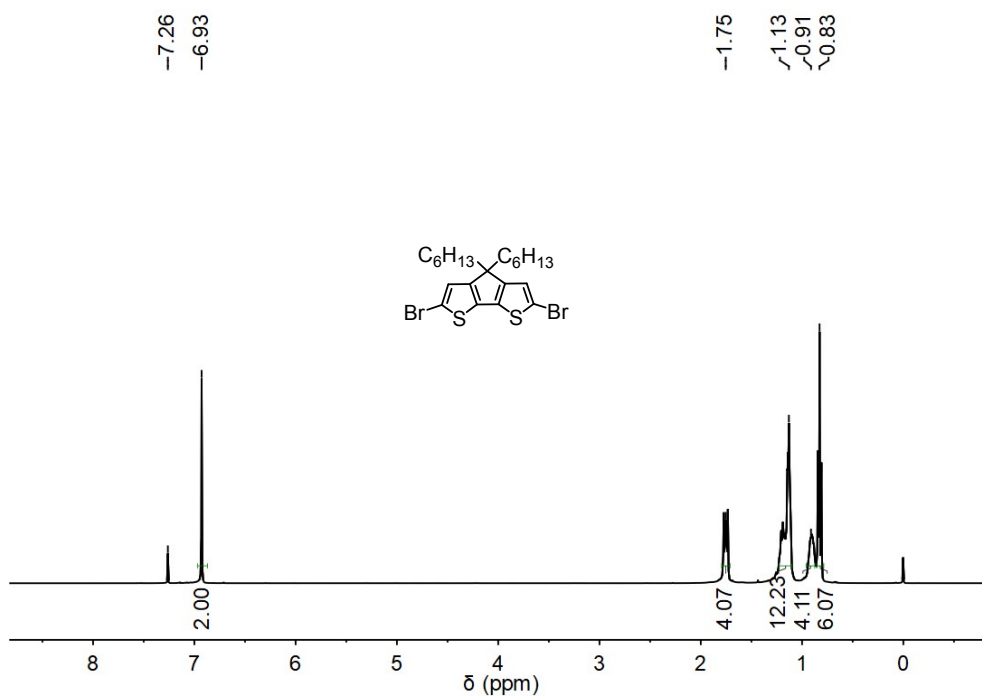

**Figure S21.**  $^1\text{H}$  NMR spectrum of compound **2d** (400 MHz,  $\text{CDCl}_3$ ).

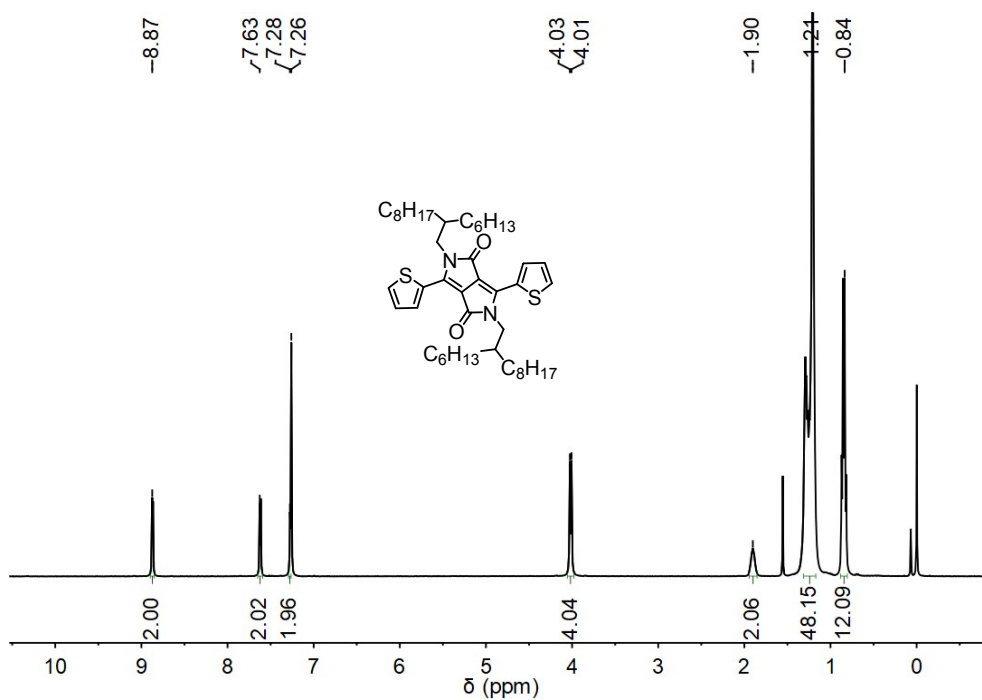

**Figure S22.** <sup>1</sup>H NMR spectrum of compound **S9** (400 MHz, CDCl<sub>3</sub>).

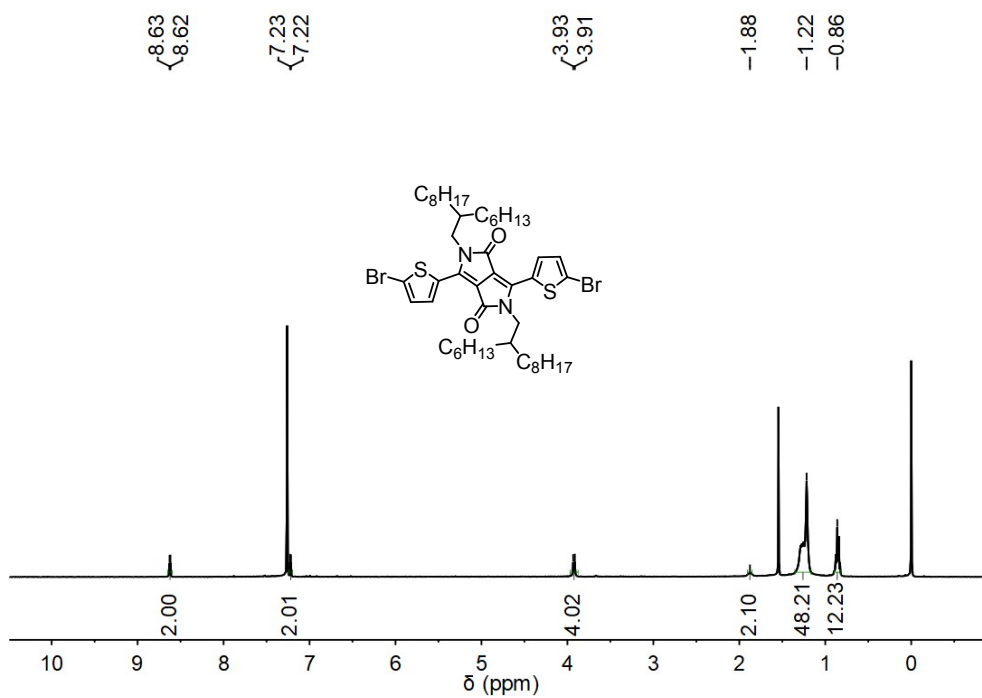

**Figure S23.** <sup>1</sup>H NMR spectrum of compound **2g** (400 MHz, CDCl<sub>3</sub>).

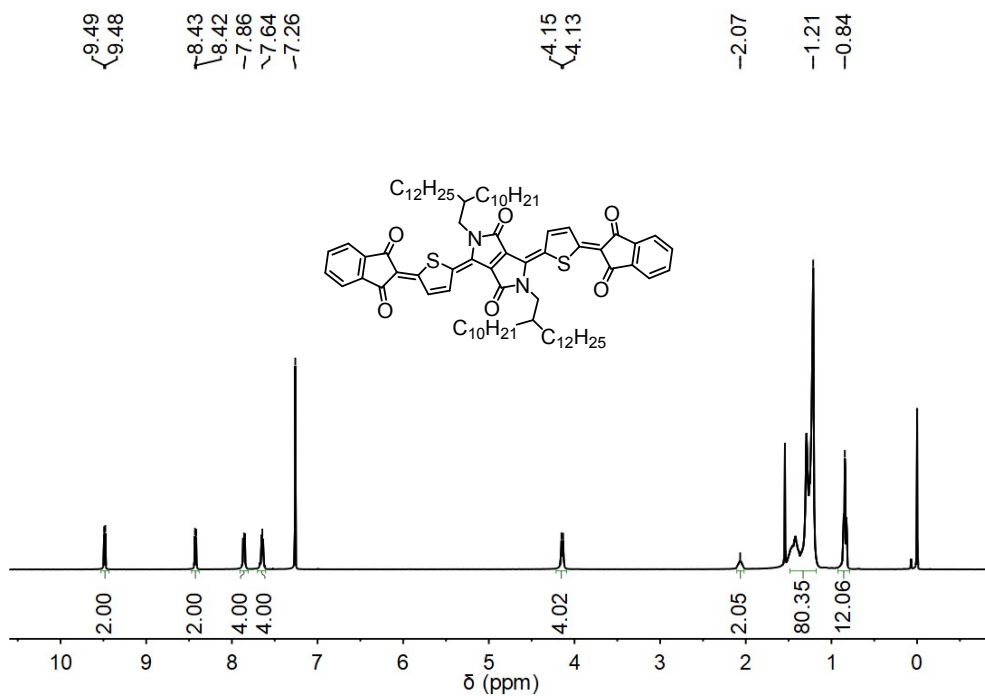

**Figure S24.** <sup>1</sup>H NMR spectrum of compound **5a** (400 MHz, CDCl<sub>3</sub>).

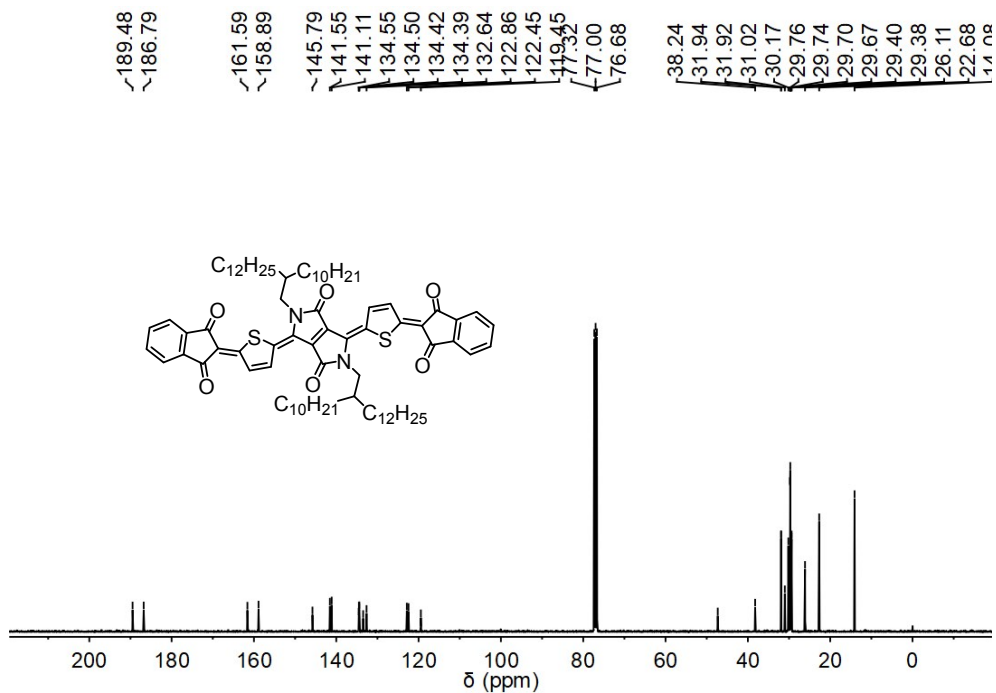

**Figure S25.** <sup>13</sup>C NMR spectrum of compound **5a** (100 MHz, CDCl<sub>3</sub>).



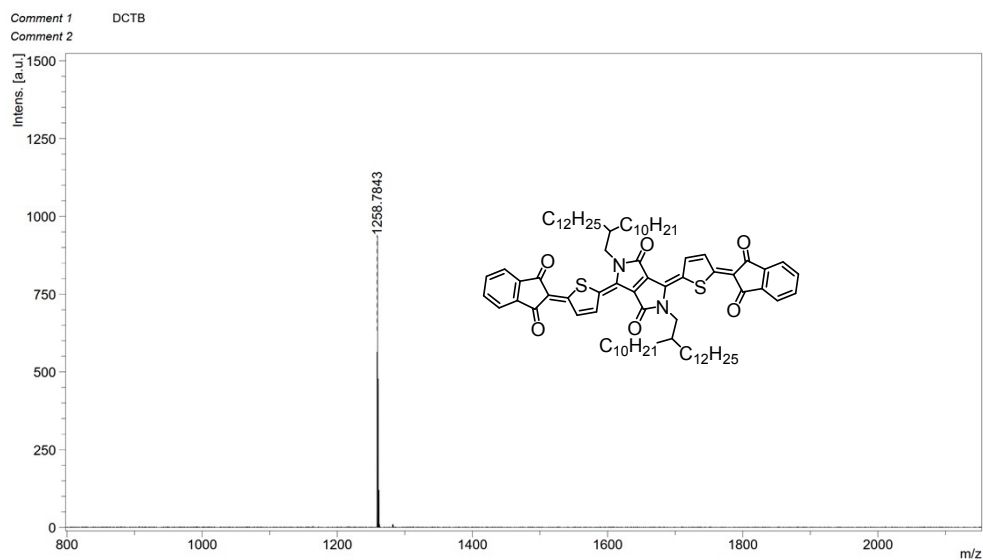

**Figure S26.** MALDI-TOF mass spectrum of compound **5a**.

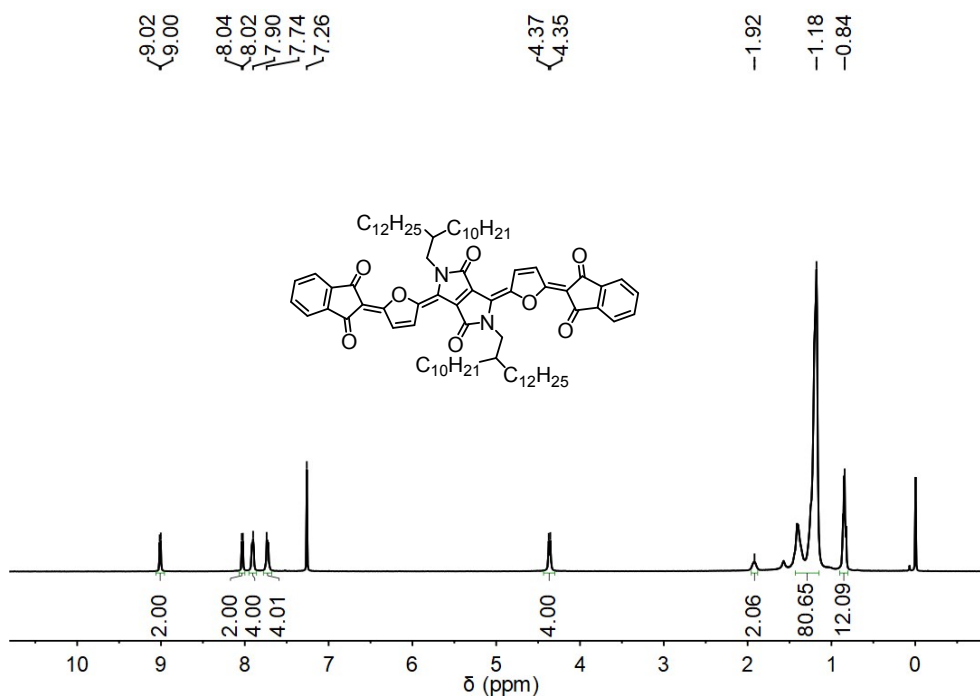

**Figure S27.**  $^1H$  NMR spectrum of compound **5b** (400 MHz,  $CDCl_3$ ).

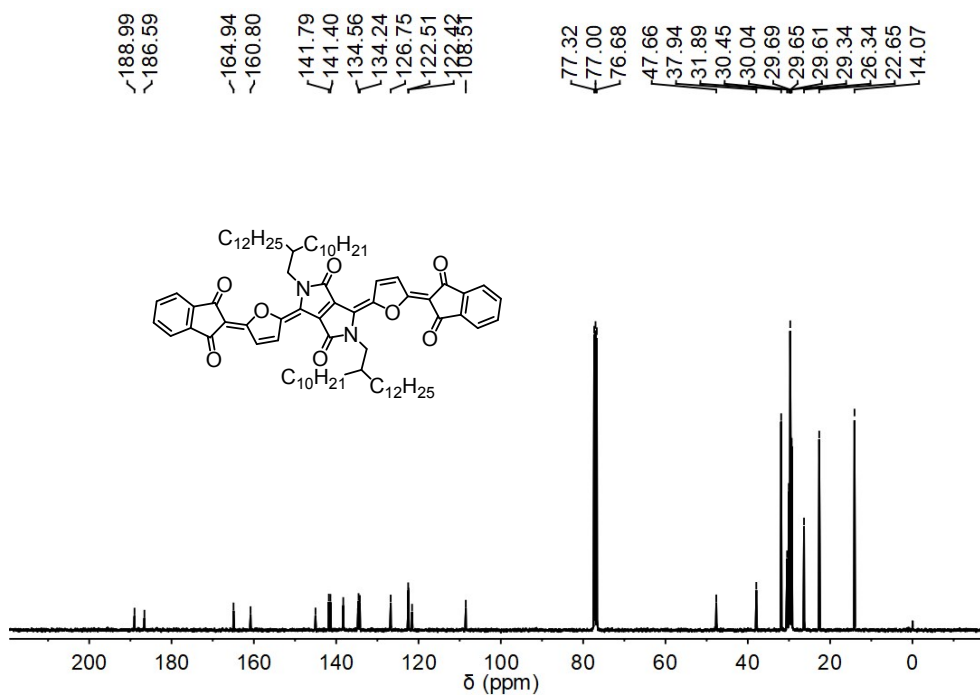

**Figure S28.**  $^{13}C$  NMR spectrum of compound **5b** (100 MHz,  $CDCl_3$ ).

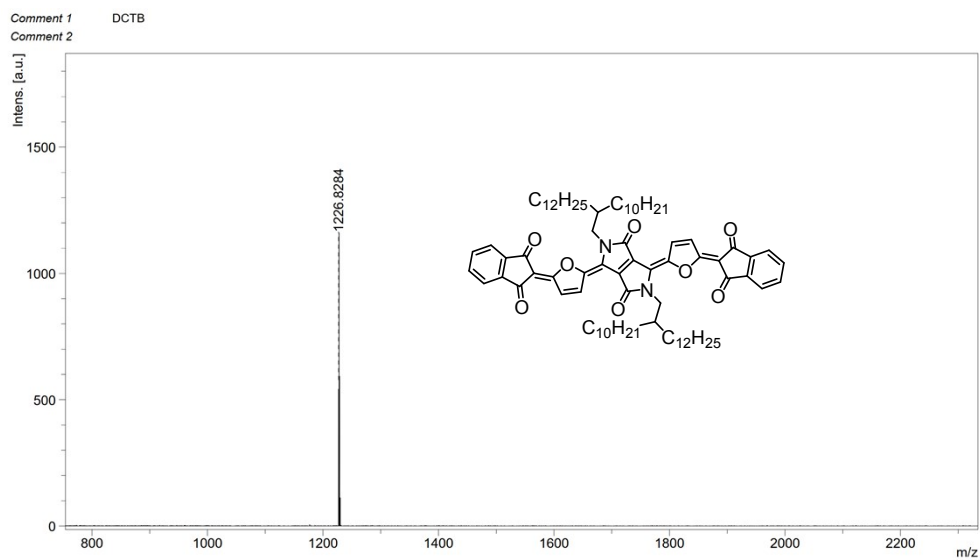

**Figure S29.** MALDI-TOF mass spectrum of compound **5b**.

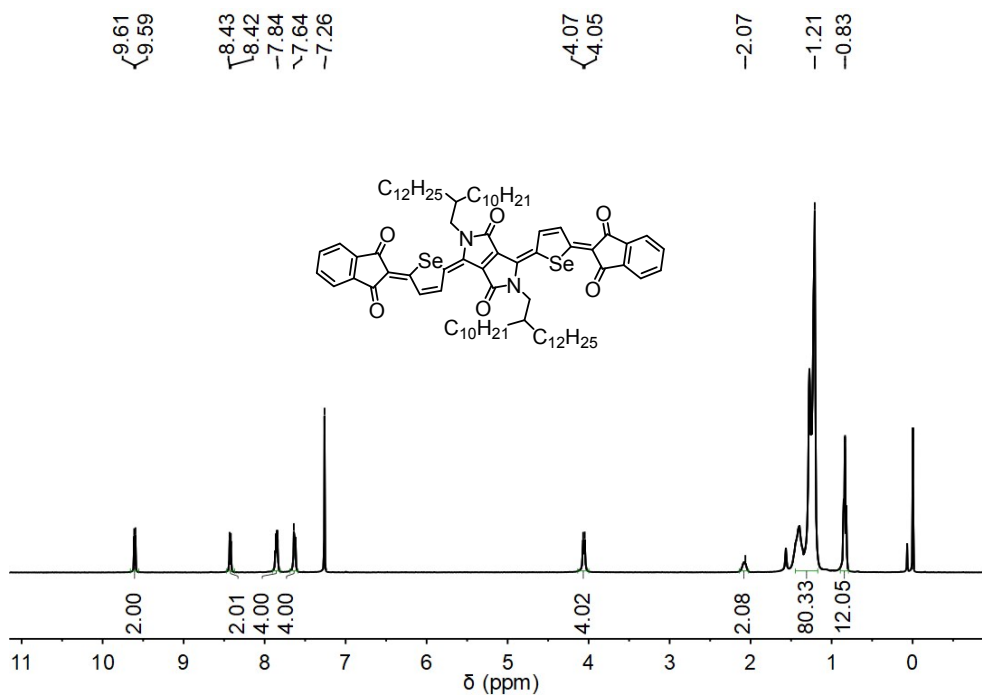

**Figure S30.** <sup>1</sup>H NMR spectrum of compound **5c** (400 MHz, CDCl<sub>3</sub>).

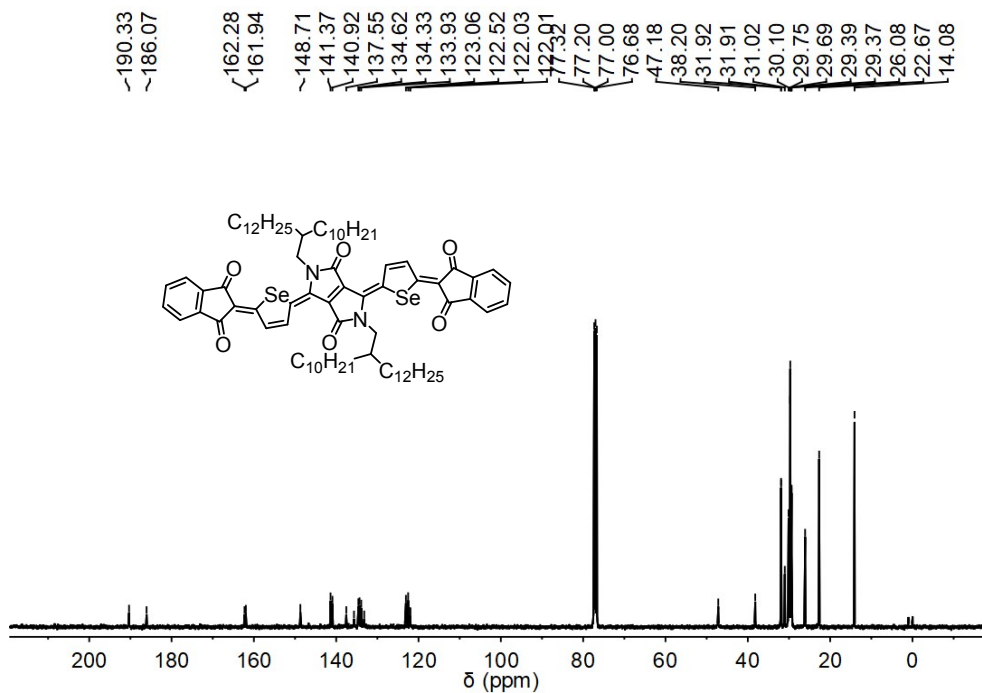

**Figure S31.** <sup>13</sup>C NMR spectrum of compound **5c** (100 MHz, CDCl<sub>3</sub>).

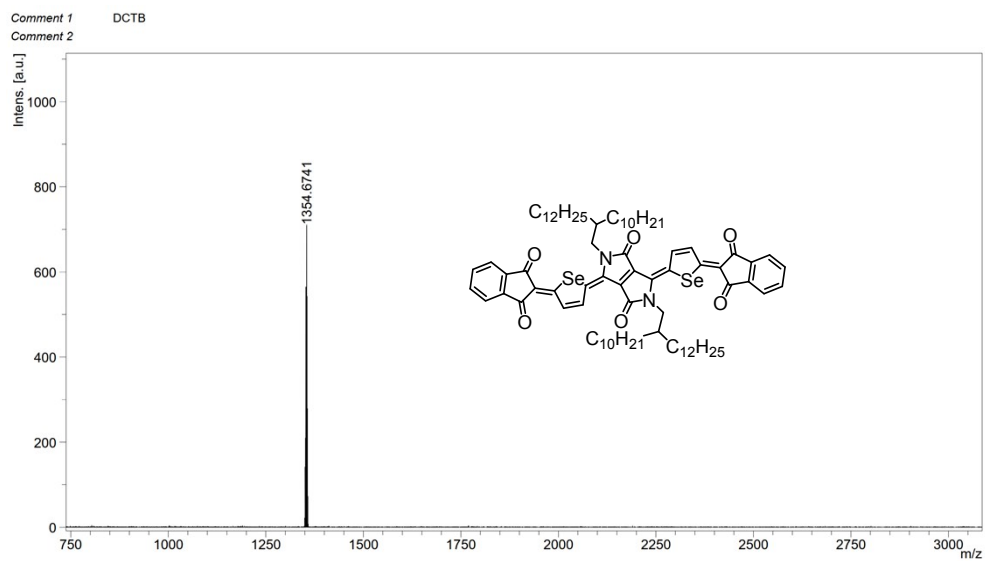

**Figure S32.** MALDI-TOF mass spectrum of compound **5c**.

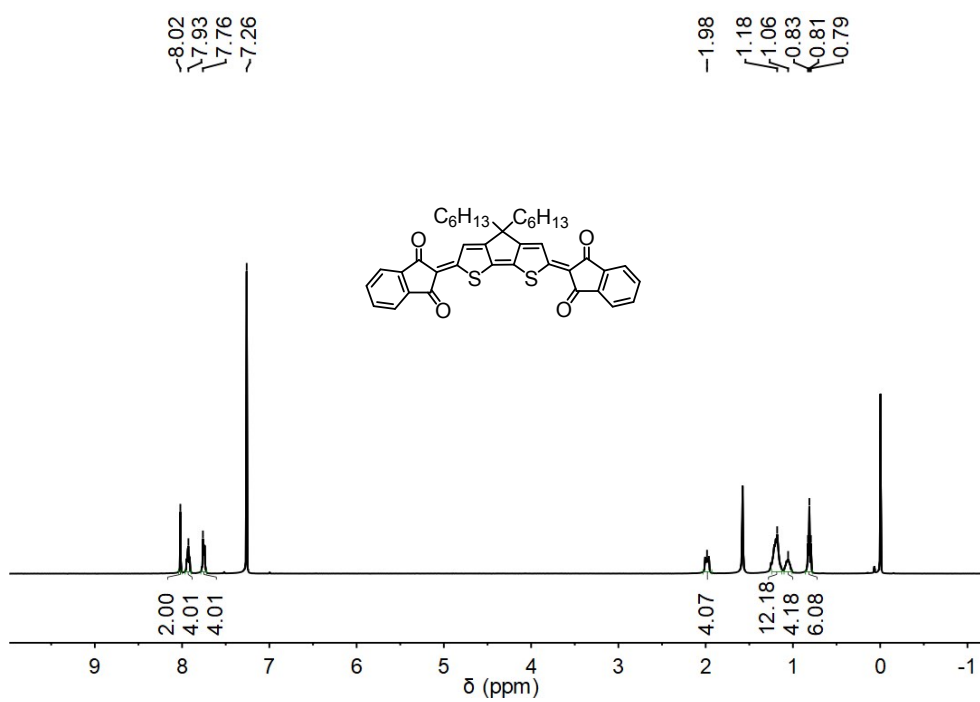

**Figure S33.**  $^1\text{H}$  NMR spectrum of compound **5d** (400 MHz,  $\text{CDCl}_3$ ).

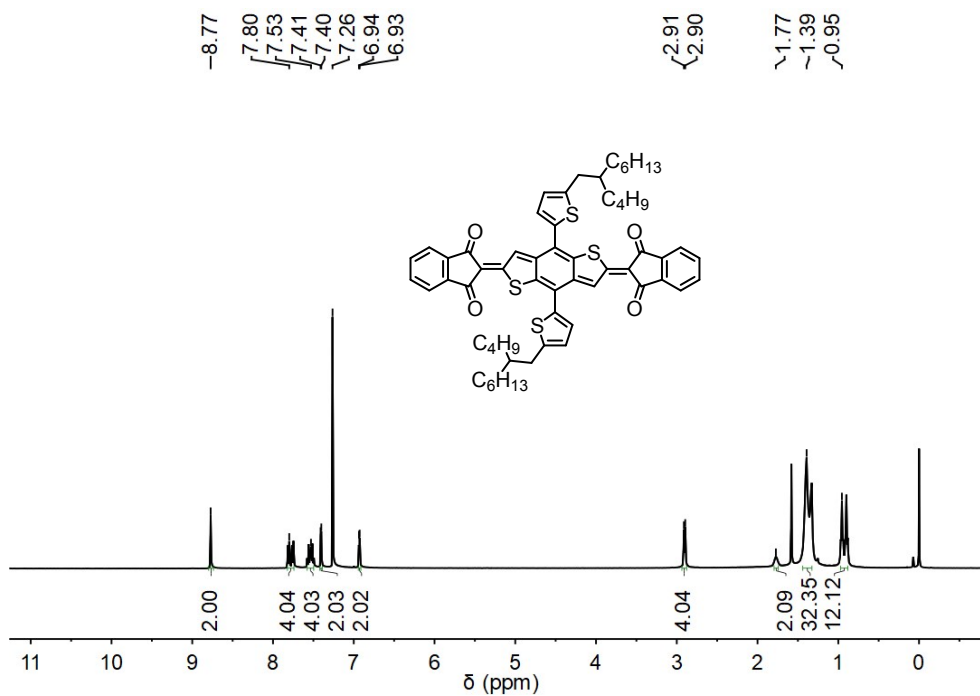

**Figure S34.** <sup>1</sup>H NMR spectrum of compound **5e** (400 MHz, CDCl<sub>3</sub>).

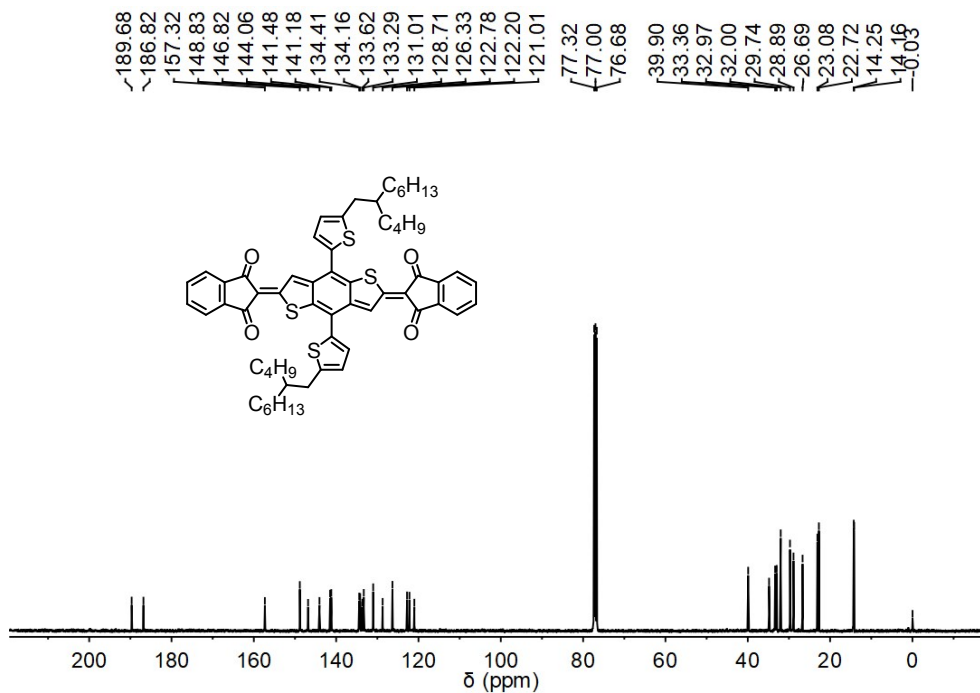

**Figure S35.** <sup>13</sup>C NMR spectrum of compound **5e** (100 MHz, CDCl<sub>3</sub>).

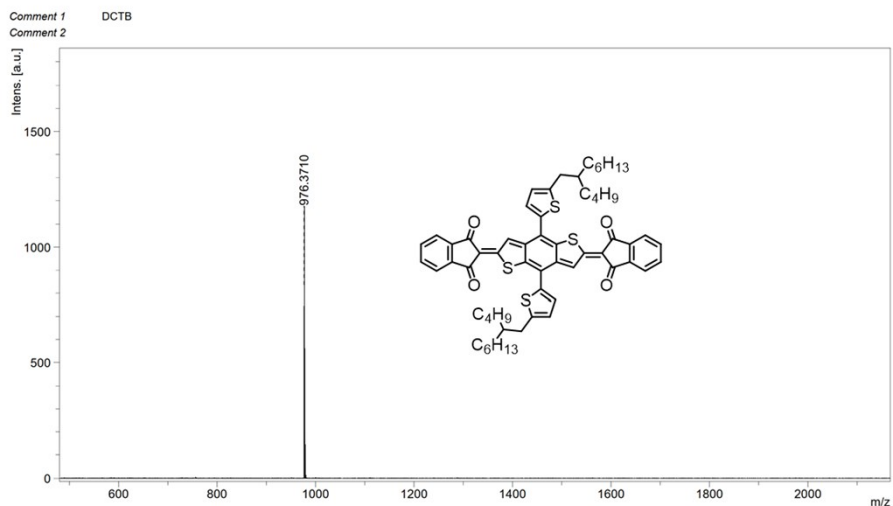

**Figure S36.** MALDI-TOF mass spectrum of compound **5e**.

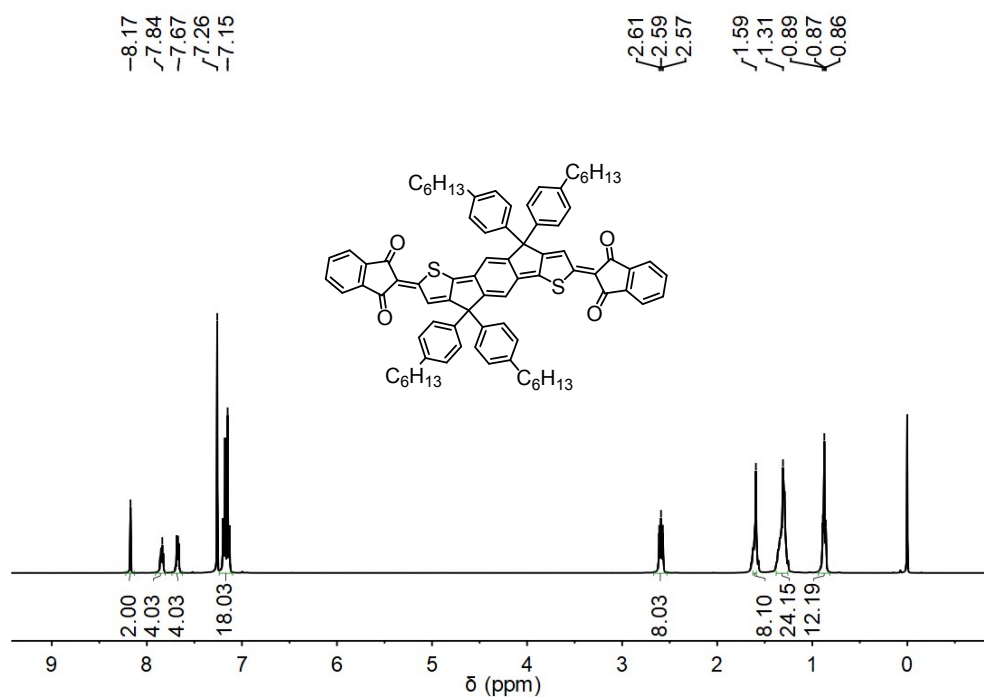

**Figure S37.**  $^1\text{H}$  NMR spectrum of compound **5f** (400 MHz,  $\text{CDCl}_3$ ).

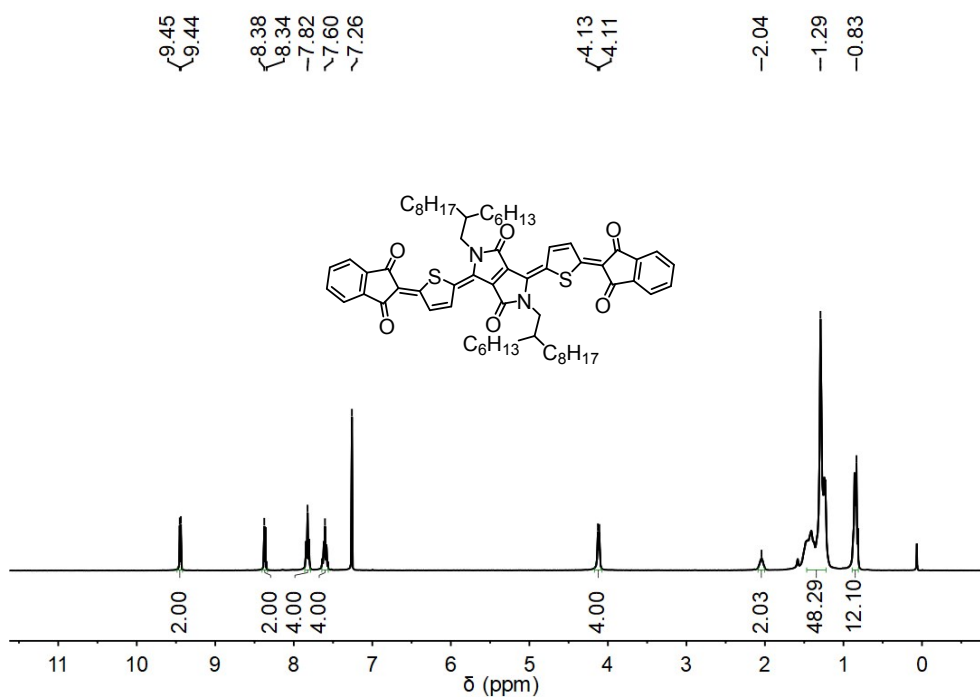

**Figure S38.** <sup>1</sup>H NMR spectrum of compound **5g** (400 MHz, CDCl<sub>3</sub>).

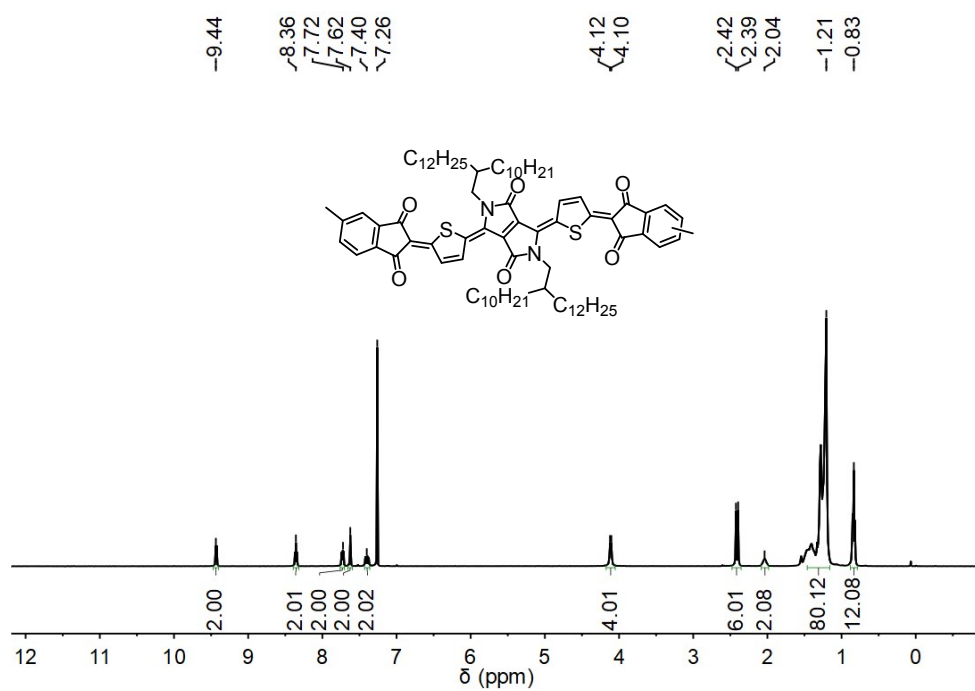

**Figure S39.** <sup>1</sup>H NMR spectrum of compound **5h** (400 MHz, CDCl<sub>3</sub>).

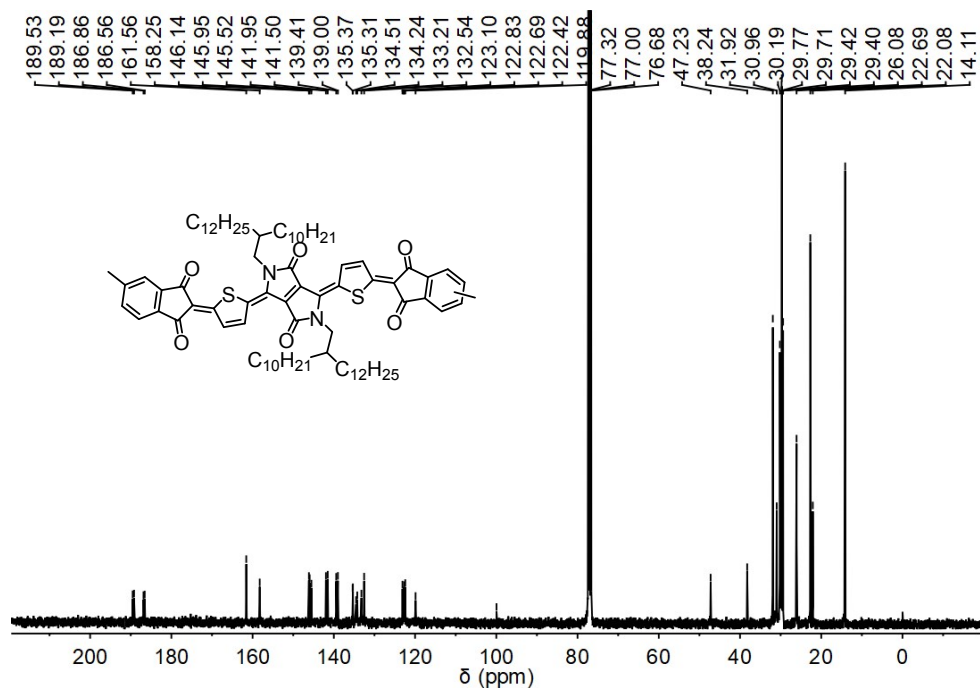

**Figure S40.**  $^{13}C$  NMR spectrum of compound **5g** (100 MHz,  $CDCl_3$ ).

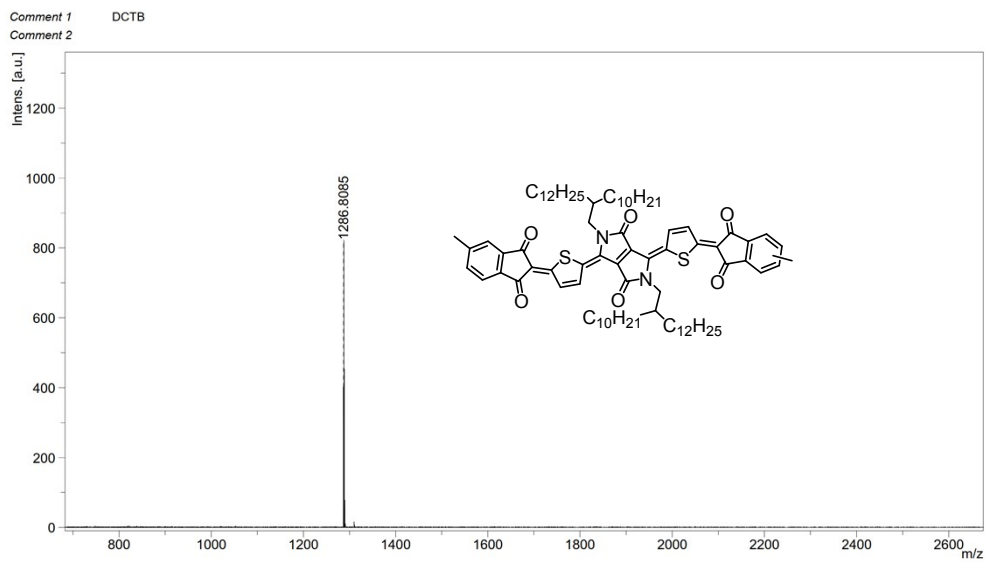

**Figure S41** MALDI-TOF mass spectrum of compound **5g**.



## 7. X-ray crystallography

The single crystals of compound **5g** was grown by slow diffusion of methanol into their toluene solution. The data were collected on a “Bruker APEX-II CCD” diffractometer. In the Olex2, the structure was solved with the ShelXT structure solution program using Intrinsic Phasing and refined with the ShelXL refinement package using Least Squares minimisation.

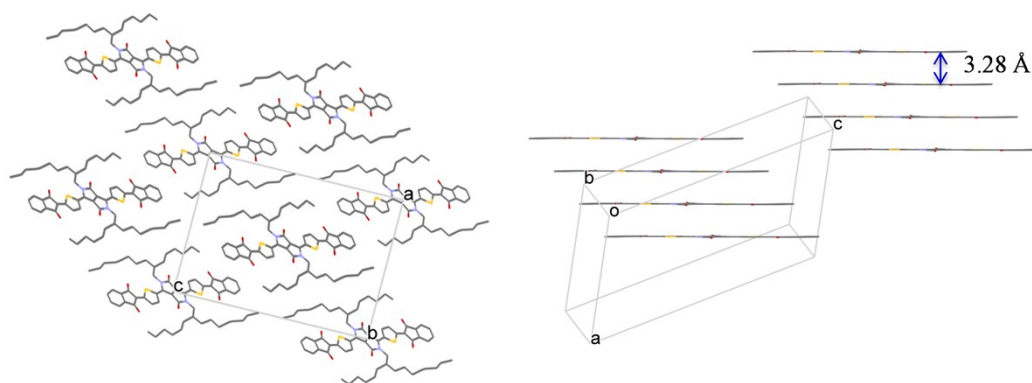

**Figure S42.** The molecular packing arrangement of compound **5g**.

**Table S5.** Crystal data and structure refinement for compound **5g**.

|                                   |                                                                              |                 |
|-----------------------------------|------------------------------------------------------------------------------|-----------------|
| Identification code               | 190708dyf_2_0m                                                               |                 |
| Empirical formula                 | C <sub>64</sub> H <sub>78</sub> N <sub>2</sub> O <sub>6</sub> S <sub>2</sub> |                 |
| Formula weight                    | 1035.40                                                                      |                 |
| Temperature                       | 170.01 K                                                                     |                 |
| Wavelength                        | 1.34139 Å                                                                    |                 |
| Crystal system                    | Monoclinic                                                                   |                 |
| Space group                       | P 1 21/n 1                                                                   |                 |
| Unit cell dimensions              | a = 19.8786(11) Å                                                            | a = 90°.        |
|                                   | b = 5.1836(3) Å                                                              | b = 90.923(4)°. |
|                                   | c = 27.5685(17) Å                                                            | g = 90°.        |
| Volume                            | 2840.4(3) Å <sup>3</sup>                                                     |                 |
| Z                                 | 2                                                                            |                 |
| Density (calculated)              | 1.211 Mg/m <sup>3</sup>                                                      |                 |
| Absorption coefficient            | 0.818 mm <sup>-1</sup>                                                       |                 |
| F(000)                            | 1112                                                                         |                 |
| Crystal size                      | 0.1 x 0.02 x 0.01 mm <sup>3</sup>                                            |                 |
| Theta range for data collection   | 2.789 to 55.037°.                                                            |                 |
| Index ranges                      | -24 ≤ h ≤ 24, -3 ≤ k ≤ 6, -33 ≤ l ≤ 32                                       |                 |
| Reflections collected             | 19822                                                                        |                 |
| Independent reflections           | 5234 [R(int) = 0.0500]                                                       |                 |
| Completeness to theta = 53.594°   | 96.5 %                                                                       |                 |
| Absorption correction             | Semi-empirical from equivalents                                              |                 |
| Max. and min. transmission        | 0.7508 and 0.5864                                                            |                 |
| Refinement method                 | Full-matrix least-squares on F <sup>2</sup>                                  |                 |
| Data / restraints / parameters    | 5234 / 83 / 336                                                              |                 |
| Goodness-of-fit on F <sup>2</sup> | 0.886                                                                        |                 |
| Final R indices [I > 2σ(I)]       | R1 = 0.0946, wR2 = 0.2388                                                    |                 |
| R indices (all data)              | R1 = 0.1385, wR2 = 0.2707                                                    |                 |
| Extinction coefficient            | n/a                                                                          |                 |
| Largest diff. peak and hole       | 0.673 and -0.484 e.Å <sup>-3</sup>                                           |                 |

## 8. Cartesian coordinates (Å) and energies for the optimized structures

|                                                    |            |           |           |    |          |           |           |
|----------------------------------------------------|------------|-----------|-----------|----|----------|-----------|-----------|
| <b>IM1-A</b>                                       |            |           |           | Pd | 1.891465 | -0.302538 | -0.630915 |
| B3LYP SCF energy in gas phase: -2973.018581 a.u.   |            |           |           | Br | 2.473259 | -3.595170 | -1.523725 |
| M06-L SCF energy in 1,4-dioxane: -2003.093021 a.u. |            |           |           | P  | 3.370388 | 0.268045  | 1.137680  |
|                                                    |            |           |           | C  | 2.620456 | -0.003197 | 2.900357  |
| C                                                  | -2.693413  | -1.534824 | -0.135221 | C  | 3.568754 | 0.143682  | 4.105468  |
| C                                                  | -3.567730  | -0.488125 | -0.451911 | C  | 1.462155 | 1.007140  | 3.040562  |
| C                                                  | -4.785342  | -0.661928 | 0.262592  | C  | 2.011171 | -1.421665 | 2.934196  |
| C                                                  | -5.633279  | 0.412275  | 0.000103  | H  | 4.379378 | -0.590350 | 4.087816  |
| N                                                  | -3.363178  | -2.356805 | 0.768878  | H  | 4.004756 | 1.142372  | 4.191149  |
| C                                                  | -4.681275  | -1.868061 | 1.054052  | H  | 2.995280 | -0.032692 | 5.025520  |
| O                                                  | -5.452697  | -2.448656 | 1.814765  | H  | 0.754463 | 0.918109  | 2.208481  |
| C                                                  | -2.926192  | -3.619873 | 1.338793  | H  | 0.912331 | 0.796891  | 3.967312  |
| H                                                  | -2.095967  | -3.481706 | 2.038963  | H  | 1.813992 | 2.042235  | 3.086520  |
| H                                                  | -3.783522  | -4.020384 | 1.883469  | H  | 1.481114 | -1.556743 | 3.886822  |
| H                                                  | -2.628186  | -4.325403 | 0.557419  | H  | 1.296265 | -1.571731 | 2.122107  |
| C                                                  | -1.370039  | -1.752118 | -0.645283 | H  | 2.768634 | -2.206923 | 2.866884  |
| C                                                  | -0.822565  | -1.042932 | -1.698391 | C  | 5.137300 | -0.493482 | 1.005248  |
| S                                                  | -0.176244  | -2.876112 | 0.053402  | C  | 6.237289 | 0.185687  | 1.842429  |
| C                                                  | 0.545609   | -1.345069 | -1.987526 | C  | 5.061505 | -1.988346 | 1.375453  |
| H                                                  | -1.396180  | -0.302858 | -2.245735 | C  | 5.532933 | -0.377320 | -0.482142 |
| C                                                  | 1.103521   | -2.234867 | -1.013728 | H  | 6.393802 | 1.225623  | 1.542728  |
| H                                                  | 0.987652   | -1.170594 | -2.963443 | H  | 6.033903 | 0.161891  | 2.916103  |
| C                                                  | -6.955266  | 0.627755  | 0.532225  | H  | 7.183744 | -0.347098 | 1.678811  |
| C                                                  | -7.614927  | -0.241730 | 1.390461  | H  | 4.267641 | -2.506628 | 0.828747  |
| S                                                  | -7.972567  | 2.030398  | 0.203544  | H  | 6.013648 | -2.469463 | 1.115201  |
| C                                                  | -8.902514  | 0.210489  | 1.770651  | H  | 4.904870 | -2.139978 | 2.447786  |
| H                                                  | -7.161089  | -1.169286 | 1.725396  | H  | 6.508059 | -0.858630 | -0.634979 |
| C                                                  | -9.235051  | 1.417726  | 1.211854  | H  | 4.802405 | -0.864617 | -1.135611 |
| H                                                  | -9.559463  | -0.340545 | 2.434516  | H  | 5.631829 | 0.669619  | -0.789879 |
| H                                                  | -10.148836 | 1.984945  | 1.330079  | C  | 3.629041 | 2.108498  | 0.992525  |
| N                                                  | -4.949990  | 1.253539  | -0.880231 | C  | 3.059018 | 2.811370  | -0.096925 |
| C                                                  | -5.401037  | 2.490992  | -1.489385 | C  | 4.337095 | 2.846152  | 1.962062  |
| H                                                  | -4.588701  | 2.820248  | -2.140430 | C  | 3.217127 | 4.208793  | -0.162081 |
| H                                                  | -6.303313  | 2.338092  | -2.090400 | C  | 2.318402 | 2.208079  | -1.266249 |
| H                                                  | -5.592785  | 3.264432  | -0.738250 | C  | 4.480039 | 4.229060  | 1.883826  |
| C                                                  | -3.649682  | 0.740848  | -1.198386 | H  | 4.788335 | 2.331347  | 2.800168  |
| O                                                  | -2.878334  | 1.324170  | -1.966875 | C  | 3.913077 | 4.917428  | 0.812120  |

|   |           |          |           |
|---|-----------|----------|-----------|
| H | 2.784481  | 4.740010 | -1.005571 |
| C | 3.069636  | 1.732808 | -2.368011 |
| C | 0.924404  | 2.427676 | -1.441622 |
| H | 5.030615  | 4.761514 | 2.654680  |
| H | 4.015252  | 5.996234 | 0.730939  |
| C | 2.482477  | 1.514841 | -3.613573 |
| H | 4.138862  | 1.592367 | -2.247279 |
| C | 0.351495  | 2.188866 | -2.702749 |
| C | 1.118200  | 1.760815 | -3.784453 |
| H | 3.092236  | 1.168793 | -4.443787 |
| H | -0.717280 | 2.341650 | -2.820754 |
| H | 0.650106  | 1.608110 | -4.753511 |
| C | 0.052377  | 2.985235 | -0.339141 |
| H | 0.074711  | 4.083582 | -0.335095 |
| H | -0.985819 | 2.674422 | -0.489669 |
| H | 0.378303  | 2.654254 | 0.650045  |

**TS1-A**

B3LYP SCF energy in gas phase: -2973.009332 a.u.

M06-L SCF energy in 1,4-dioxane: -2972.964389 a.u.

|   |           |           |           |
|---|-----------|-----------|-----------|
| C | -3.003681 | -1.315121 | 0.254311  |
| C | -4.027908 | -0.610516 | -0.393712 |
| C | -5.136051 | -0.479072 | 0.485624  |
| C | -6.137313 | 0.265376  | -0.139517 |
| N | -3.477025 | -1.621447 | 1.530722  |
| C | -4.807834 | -1.130202 | 1.735374  |
| O | -5.423450 | -1.302312 | 2.785394  |
| C | -2.835261 | -2.413144 | 2.564969  |
| H | -1.957927 | -1.904871 | 2.979369  |
| H | -3.576510 | -2.537242 | 3.357061  |
| H | -2.539374 | -3.396497 | 2.186227  |
| C | -1.723505 | -1.663577 | -0.275809 |
| C | -1.343462 | -1.463441 | -1.608949 |
| S | -0.351080 | -2.255115 | 0.665930  |
| C | -0.014457 | -1.790437 | -1.889308 |
| H | -2.037537 | -1.063167 | -2.341036 |
| C | 0.715998  | -2.161398 | -0.745541 |
| H | 0.423638  | -1.778858 | -2.879701 |
| C | -7.415020 | 0.638761  | 0.410550  |
| C | -7.870880 | 0.278255  | 1.672086  |
| S | -8.627468 | 1.627274  | -0.403959 |

|    |            |           |           |
|----|------------|-----------|-----------|
| C  | -9.159362  | 0.784497  | 1.971188  |
| H  | -7.273777  | -0.329799 | 2.344677  |
| C  | -9.694283  | 1.529129  | 0.951224  |
| H  | -9.672064  | 0.602493  | 2.909209  |
| H  | -10.654775 | 2.025922  | 0.913639  |
| N  | -5.658726  | 0.591057  | -1.408588 |
| C  | -6.320492  | 1.326550  | -2.470964 |
| H  | -5.627009  | 1.326869  | -3.314313 |
| H  | -7.254375  | 0.841819  | -2.773063 |
| H  | -6.526406  | 2.361465  | -2.178202 |
| C  | -4.340855  | 0.069705  | -1.626445 |
| O  | -3.731376  | 0.234488  | -2.686382 |
| Pd | 2.224151   | -0.906710 | -0.265654 |
| Br | 2.143361   | -3.723356 | -0.925671 |
| P  | 4.143457   | 0.392665  | 0.377141  |
| C  | 4.700638   | -0.254158 | 2.122277  |
| C  | 6.188393   | -0.121588 | 2.505796  |
| C  | 3.840071   | 0.474999  | 3.175376  |
| C  | 4.341205   | -1.757737 | 2.180628  |
| H  | 6.843553   | -0.677493 | 1.829521  |
| H  | 6.537803   | 0.912558  | 2.551767  |
| H  | 6.328321   | -0.546410 | 3.508886  |
| H  | 2.771078   | 0.378469  | 2.955975  |
| H  | 4.016977   | 0.021631  | 4.159530  |
| H  | 4.078268   | 1.539861  | 3.246858  |
| H  | 4.572501   | -2.142092 | 3.183341  |
| H  | 3.275744   | -1.926442 | 1.990212  |
| H  | 4.905176   | -2.354325 | 1.458467  |
| C  | 5.535668   | 0.127248  | -0.933697 |
| C  | 6.828996   | 0.938936  | -0.736480 |
| C  | 5.874309   | -1.375580 | -0.997026 |
| C  | 4.917449   | 0.545069  | -2.285627 |
| H  | 6.643153   | 2.016112  | -0.763510 |
| H  | 7.347196   | 0.701075  | 0.195678  |
| H  | 7.518407   | 0.705538  | -1.558947 |
| H  | 4.977299   | -1.991264 | -1.124048 |
| H  | 6.531314   | -1.559334 | -1.857432 |
| H  | 6.405208   | -1.720010 | -0.104292 |
| H  | 5.640607   | 0.349713  | -3.088684 |
| H  | 4.001643   | -0.013202 | -2.507164 |
| H  | 4.679805   | 1.613543  | -2.306161 |
| C  | 4.039340   | 2.251760  | 0.533003  |
| C  | 2.936733   | 3.002397  | 0.051643  |

|   |           |          |           |
|---|-----------|----------|-----------|
| C | 5.093436  | 2.955604 | 1.151627  |
| C | 2.946935  | 4.401960 | 0.215571  |
| C | 1.723854  | 2.473756 | -0.663715 |
| C | 5.081429  | 4.338144 | 1.311884  |
| H | 5.954111  | 2.412136 | 1.516978  |
| C | 3.995056  | 5.071124 | 0.838163  |
| H | 2.098963  | 4.965886 | -0.163184 |
| C | 1.723847  | 2.457739 | -2.066584 |
| C | 0.519987  | 2.210793 | 0.030581  |
| H | 5.916889  | 4.833987 | 1.798709  |
| H | 3.964223  | 6.151884 | 0.947221  |
| C | 0.567202  | 2.162623 | -2.788982 |
| H | 2.639956  | 2.704606 | -2.595730 |
| C | -0.630492 | 1.921099 | -0.713581 |
| C | -0.619269 | 1.892782 | -2.108876 |
| H | 0.593111  | 2.160442 | -3.875631 |
| H | -1.558936 | 1.718294 | -0.185480 |
| H | -1.533369 | 1.659208 | -2.646947 |
| C | 0.447147  | 2.261629 | 1.539781  |
| H | 0.866000  | 3.192423 | 1.938669  |
| H | -0.589543 | 2.181546 | 1.881271  |
| H | 1.010451  | 1.436640 | 1.992096  |

#### IM2-A

B3LYP SCF energy in gas phase: -2973.040818 a.u.

M06-L SCF energy in 1,4-dioxane: -2972.998497 a.u.

|   |           |           |           |
|---|-----------|-----------|-----------|
| C | -3.582051 | -0.200732 | 0.359522  |
| C | -4.768550 | -0.188823 | -0.382945 |
| C | -5.875997 | -0.056770 | 0.500383  |
| C | -7.057023 | -0.025911 | -0.239098 |
| N | -3.950425 | -0.077506 | 1.699929  |
| C | -5.372948 | 0.014292  | 1.853792  |
| O | -5.914528 | 0.122044  | 2.953188  |
| C | -3.102210 | -0.101848 | 2.877216  |
| H | -2.438289 | 0.768365  | 2.915315  |
| H | -3.775349 | -0.073141 | 3.736463  |
| H | -2.500137 | -1.014981 | 2.915626  |
| C | -2.244184 | -0.318483 | -0.139055 |
| C | -1.910967 | -0.532803 | -1.473516 |
| S | -0.755772 | -0.166563 | 0.806352  |
| C | -0.518623 | -0.575484 | -1.711619 |
| H | -2.669953 | -0.644476 | -2.242353 |

|    |            |           |           |
|----|------------|-----------|-----------|
| C  | 0.259043   | -0.361288 | -0.588626 |
| H  | -0.095194  | -0.771902 | -2.690859 |
| C  | -8.399639  | 0.099966  | 0.272228  |
| C  | -8.730469  | 0.201973  | 1.616408  |
| S  | -9.864112  | 0.149341  | -0.709259 |
| C  | -10.123985 | 0.316419  | 1.847123  |
| H  | -7.972705  | 0.193141  | 2.393819  |
| C  | -10.863377 | 0.303218  | 0.692655  |
| H  | -10.562350 | 0.404598  | 2.835176  |
| H  | -11.937248 | 0.373156  | 0.580317  |
| N  | -6.691660  | -0.138952 | -1.579912 |
| C  | -7.540037  | -0.181280 | -2.755607 |
| H  | -6.865845  | -0.292942 | -3.607549 |
| H  | -8.226808  | -1.033909 | -2.728061 |
| H  | -8.115380  | 0.743219  | -2.873027 |
| C  | -5.265545  | -0.246569 | -1.734082 |
| O  | -4.728946  | -0.363093 | -2.836531 |
| Pd | 2.273439   | -0.371650 | -0.368631 |
| Br | 1.861878   | -2.826620 | -0.022643 |
| P  | 4.675216   | -0.469548 | 0.115009  |
| C  | 5.041990   | -1.136247 | 1.891985  |
| C  | 6.350760   | -0.623177 | 2.525436  |
| C  | 3.864846   | -0.645333 | 2.764085  |
| C  | 5.062547   | -2.678873 | 1.903771  |
| H  | 7.242438   | -0.899823 | 1.954970  |
| H  | 6.348521   | 0.460677  | 2.665610  |
| H  | 6.449756   | -1.080629 | 3.518442  |
| H  | 2.909174   | -1.050364 | 2.419110  |
| H  | 4.022931   | -0.979705 | 3.797822  |
| H  | 3.799101   | 0.448910  | 2.779164  |
| H  | 5.113014   | -3.013539 | 2.948248  |
| H  | 4.164105   | -3.110180 | 1.457490  |
| H  | 5.942201   | -3.082805 | 1.393259  |
| C  | 5.794850   | -1.291391 | -1.221754 |
| C  | 7.278141   | -1.456986 | -0.836715 |
| C  | 5.216850   | -2.680278 | -1.570732 |
| C  | 5.702601   | -0.410974 | -2.486588 |
| H  | 7.785120   | -0.501896 | -0.676238 |
| H  | 7.412010   | -2.078654 | 0.052431  |
| H  | 7.798092   | -1.959218 | -1.663105 |
| H  | 4.170199   | -2.624977 | -1.877805 |
| H  | 5.799272   | -3.098739 | -2.402368 |
| H  | 5.276566   | -3.384068 | -0.737750 |

|   |           |           |           |
|---|-----------|-----------|-----------|
| H | 6.293046  | -0.876641 | -3.285875 |
| H | 4.671135  | -0.336153 | -2.847093 |
| H | 6.094729  | 0.598422  | -2.326446 |
| C | 5.178613  | 1.311824  | 0.174847  |
| C | 4.183073  | 2.290166  | -0.021696 |
| C | 6.502084  | 1.736788  | 0.406785  |
| C | 4.542109  | 3.651579  | 0.039690  |
| C | 2.751802  | 2.035653  | -0.431963 |
| C | 6.842309  | 3.084983  | 0.461053  |
| H | 7.280796  | 1.002530  | 0.563499  |
| C | 5.851525  | 4.051047  | 0.281817  |
| H | 3.774550  | 4.401791  | -0.129257 |
| C | 2.522662  | 1.733625  | -1.806125 |
| C | 1.679270  | 2.622981  | 0.321799  |
| H | 7.872450  | 3.377132  | 0.644441  |
| H | 6.097910  | 5.108590  | 0.317499  |
| C | 1.321185  | 2.080872  | -2.440926 |
| H | 3.360179  | 1.396412  | -2.407706 |
| C | 0.497054  | 2.941934  | -0.339188 |
| C | 0.320920  | 2.703015  | -1.710430 |
| H | 1.191204  | 1.872064  | -3.498329 |
| H | -0.311729 | 3.396438  | 0.226202  |
| H | -0.610161 | 2.989815  | -2.189788 |
| C | 1.817170  | 2.907122  | 1.799569  |
| H | 1.873037  | 1.971737  | 2.369245  |
| H | 2.720535  | 3.479783  | 2.032050  |
| H | 0.952679  | 3.466673  | 2.167893  |

### IM3-A

B3LYP SCF energy in gas phase: -3469.545875 a.u.

M06-L SCF energy in 1,4-dioxane: -3469.527456 a.u.

|   |          |           |           |
|---|----------|-----------|-----------|
| C | 3.396650 | -0.320519 | -0.175839 |
| C | 4.583036 | -0.239346 | 0.578428  |
| C | 5.650190 | -0.819476 | -0.160363 |
| C | 6.825750 | -0.750899 | 0.582591  |
| N | 3.739489 | -0.951797 | -1.376661 |
| C | 5.126628 | -1.283048 | -1.428571 |
| O | 5.644859 | -1.837924 | -2.398641 |
| C | 2.886458 | -1.240717 | -2.515963 |
| H | 2.438379 | -0.327351 | -2.918786 |
| H | 3.531327 | -1.694852 | -3.270842 |
| H | 2.088208 | -1.941806 | -2.253177 |

|    |           |           |           |
|----|-----------|-----------|-----------|
| C  | 2.099278  | 0.139453  | 0.180597  |
| C  | 1.795874  | 0.822821  | 1.362467  |
| S  | 0.610937  | -0.032883 | -0.766808 |
| C  | 0.439882  | 1.177480  | 1.477547  |
| H  | 2.556729  | 1.048378  | 2.104275  |
| C  | -0.373024 | 0.778512  | 0.414865  |
| H  | 0.051570  | 1.741823  | 2.318247  |
| C  | 8.131993  | -1.226255 | 0.195148  |
| C  | 8.436033  | -1.834578 | -1.014372 |
| S  | 9.586613  | -1.124632 | 1.190862  |
| C  | 9.799404  | -2.206611 | -1.134370 |
| H  | 7.678643  | -1.996583 | -1.775192 |
| C  | 10.546807 | -1.891129 | -0.030069 |
| H  | 10.210301 | -2.692395 | -2.013305 |
| H  | 11.601472 | -2.059861 | 0.142464  |
| N  | 6.493103  | -0.127708 | 1.786694  |
| C  | 7.347480  | 0.202973  | 2.907823  |
| H  | 6.700069  | 0.694416  | 3.638151  |
| H  | 7.787764  | -0.691269 | 3.363497  |
| H  | 8.150318  | 0.890936  | 2.619460  |
| C  | 5.094975  | 0.217812  | 1.840601  |
| O  | 4.598258  | 0.781667  | 2.819717  |
| Pd | -2.320324 | 1.123366  | 0.065896  |
| Br | -4.803854 | 1.857198  | -0.593160 |
| P  | -3.240901 | -0.795729 | 1.375887  |
| C  | -2.127204 | -2.304770 | 1.911919  |
| C  | -2.933361 | -3.461795 | 2.539342  |
| C  | -1.450045 | -2.856084 | 0.642664  |
| C  | -1.005968 | -1.872508 | 2.877762  |
| H  | -3.398415 | -3.199356 | 3.491232  |
| H  | -3.717675 | -3.822311 | 1.867430  |
| H  | -2.248078 | -4.299779 | 2.729615  |
| H  | -0.882874 | -2.094111 | 0.106662  |
| H  | -0.752290 | -3.653297 | 0.935814  |
| H  | -2.171693 | -3.287129 | -0.048502 |
| H  | -0.346760 | -2.734884 | 3.048008  |
| H  | -0.396462 | -1.068430 | 2.460030  |
| H  | -1.375291 | -1.554565 | 3.855267  |
| C  | -3.863825 | 0.069830  | 3.038565  |
| C  | -4.101042 | -0.841891 | 4.264321  |
| C  | -2.745621 | 1.075668  | 3.410708  |
| C  | -5.139484 | 0.912147  | 2.814555  |
| H  | -4.875972 | -1.598229 | 4.111343  |

|   |           |           |           |
|---|-----------|-----------|-----------|
| H | -3.196443 | -1.352350 | 4.600561  |
| H | -4.437036 | -0.205732 | 5.094562  |
| H | -2.611054 | 1.829848  | 2.628971  |
| H | -3.038525 | 1.594100  | 4.334235  |
| H | -1.780237 | 0.598098  | 3.592416  |
| H | -5.315229 | 1.495726  | 3.729394  |
| H | -5.031739 | 1.605550  | 1.980990  |
| H | -6.033886 | 0.313860  | 2.629994  |
| C | -4.705427 | -1.673734 | 0.567102  |
| C | -4.781319 | -2.077813 | -0.800197 |
| C | -5.832939 | -1.920814 | 1.372568  |
| C | -6.003004 | -2.590182 | -1.276828 |
| C | -3.677528 | -2.088564 | -1.825346 |
| C | -7.021987 | -2.456015 | 0.883126  |
| H | -5.789832 | -1.687937 | 2.425164  |
| C | -7.120015 | -2.768310 | -0.468090 |
| H | -6.060794 | -2.853030 | -2.329368 |
| C | -3.193172 | -0.898424 | -2.383651 |
| C | -3.197857 | -3.326119 | -2.326173 |
| H | -7.861051 | -2.611443 | 1.556720  |
| H | -8.043910 | -3.157672 | -0.888459 |
| C | -2.217721 | -0.903408 | -3.383844 |
| H | -3.601824 | 0.045921  | -2.046809 |
| C | -2.217190 | -3.312257 | -3.326475 |
| C | -1.722508 | -2.118244 | -3.852707 |
| H | -1.854295 | 0.046393  | -3.764727 |
| H | -1.836709 | -4.262362 | -3.697731 |
| H | -0.959054 | -2.141556 | -4.627142 |
| C | -3.700892 | -4.666624 | -1.826006 |
| H | -4.660195 | -4.941487 | -2.283258 |
| H | -2.984431 | -5.458637 | -2.070502 |
| H | -3.859716 | -4.676265 | -0.742941 |
| C | 0.447008  | 4.048331  | -0.512636 |
| C | 0.485366  | 3.464226  | -1.780760 |
| C | 1.625130  | 3.546232  | -2.577573 |
| C | 2.733430  | 4.228811  | -2.069723 |
| C | 2.694685  | 4.815756  | -0.793758 |
| C | 1.547242  | 4.732070  | -0.001084 |
| C | -0.914199 | 3.832639  | 0.092439  |
| C | -1.695742 | 2.984897  | -0.858651 |
| C | -0.846610 | 2.830054  | -2.077963 |
| H | 1.636507  | 3.091764  | -3.564522 |
| H | 3.639775  | 4.309254  | -2.665422 |

|   |           |          |           |
|---|-----------|----------|-----------|
| H | 3.572257  | 5.339440 | -0.421943 |
| H | 1.500818  | 5.182478 | 0.986484  |
| O | -1.131665 | 2.325791 | -3.159698 |
| O | -1.268410 | 4.312500 | 1.163702  |
| H | -2.706366 | 3.338889 | -1.057776 |

#### IM4-A

B3LYP SCF energy in gas phase: -3456.035650 a.u.

M06-L SCF energy in 1,4-dioxane: -3455.993167 a.u.

|   |           |           |           |
|---|-----------|-----------|-----------|
| C | 3.282539  | -0.127273 | -0.414894 |
| C | 4.448722  | -0.412129 | 0.303570  |
| C | 5.557993  | -0.430768 | -0.587171 |
| C | 6.718090  | -0.730953 | 0.124720  |
| N | 3.664527  | 0.034221  | -1.746962 |
| C | 5.077184  | -0.140940 | -1.919273 |
| O | 5.629100  | -0.034619 | -3.013657 |
| C | 2.841005  | 0.387906  | -2.888706 |
| H | 2.097881  | -0.386454 | -3.105446 |
| H | 3.521961  | 0.475773  | -3.737713 |
| H | 2.330167  | 1.343163  | -2.731929 |
| C | 1.948635  | -0.016543 | 0.098661  |
| C | 1.604596  | -0.110339 | 1.442211  |
| S | 0.479487  | 0.238103  | -0.852130 |
| C | 0.216929  | 0.019078  | 1.687276  |
| H | 2.349985  | -0.272637 | 2.215569  |
| C | -0.554208 | 0.185601  | 0.550050  |
| H | -0.200479 | 0.013718  | 2.686786  |
| C | 8.054975  | -0.850307 | -0.402976 |
| C | 8.401495  | -0.665363 | -1.734279 |
| S | 9.490429  | -1.256029 | 0.537872  |
| C | 9.784119  | -0.845524 | -1.987306 |
| H | 7.662447  | -0.409435 | -2.487265 |
| C | 10.499384 | -1.166792 | -0.862575 |
| H | 10.232169 | -0.740106 | -2.969285 |
| H | 11.560756 | -1.356217 | -0.771336 |
| N | 6.338420  | -0.897525 | 1.455795  |
| C | 7.164812  | -1.202389 | 2.608263  |
| H | 6.487179  | -1.228626 | 3.464365  |
| H | 7.924560  | -0.431615 | 2.775636  |
| H | 7.653858  | -2.177277 | 2.508922  |
| C | 4.923550  | -0.707124 | 1.631742  |
| O | 4.377755  | -0.799440 | 2.731705  |

|    |           |           |           |
|----|-----------|-----------|-----------|
| Pd | -2.534096 | 0.443561  | 0.350743  |
| P  | -3.207630 | -1.909492 | 0.296289  |
| C  | -3.355556 | -2.711301 | 2.049848  |
| C  | -3.481209 | -4.246784 | 2.070348  |
| C  | -4.594375 | -2.103148 | 2.739975  |
| C  | -2.115546 | -2.302093 | 2.870935  |
| H  | -2.601000 | -4.743578 | 1.654444  |
| H  | -4.368827 | -4.609043 | 1.544142  |
| H  | -3.572965 | -4.573828 | 3.114441  |
| H  | -4.515632 | -1.013964 | 2.818499  |
| H  | -4.658121 | -2.497819 | 3.762138  |
| H  | -5.527093 | -2.353048 | 2.225293  |
| H  | -2.195440 | -2.737594 | 3.875674  |
| H  | -2.056088 | -1.216364 | 2.977793  |
| H  | -1.178031 | -2.649358 | 2.430433  |
| C  | -2.174908 | -3.010509 | -0.906866 |
| C  | -2.785693 | -4.365941 | -1.319844 |
| C  | -0.789273 | -3.277838 | -0.280709 |
| C  | -2.022645 | -2.171475 | -2.194891 |
| H  | -3.692334 | -4.246121 | -1.917559 |
| H  | -3.005449 | -5.021471 | -0.474050 |
| H  | -2.051318 | -4.886298 | -1.948594 |
| H  | -0.312263 | -2.373960 | 0.099647  |
| H  | -0.131918 | -3.703507 | -1.049560 |
| H  | -0.847893 | -4.006954 | 0.533649  |
| H  | -1.401626 | -2.725527 | -2.910895 |
| H  | -1.543440 | -1.208830 | -2.009668 |
| H  | -2.993705 | -1.990717 | -2.669700 |
| C  | -4.920355 | -1.949238 | -0.416439 |
| C  | -5.532717 | -0.746697 | -0.830014 |
| C  | -5.622494 | -3.156590 | -0.607210 |
| C  | -6.776688 | -0.807074 | -1.488599 |
| C  | -5.076789 | 0.651116  | -0.497465 |
| C  | -6.862300 | -3.196965 | -1.238552 |
| H  | -5.191453 | -4.087932 | -0.265653 |
| C  | -7.433676 | -2.013252 | -1.704966 |
| H  | -7.240928 | 0.122155  | -1.806473 |
| C  | -4.825784 | 1.607659  | -1.521586 |
| C  | -5.371979 | 1.115520  | 0.810047  |
| H  | -7.372208 | -4.147220 | -1.370254 |
| H  | -8.394500 | -2.025087 | -2.212025 |
| C  | -4.961654 | 2.966856  | -1.215573 |
| C  | -5.503620 | 2.475560  | 1.088573  |

|   |           |          |           |
|---|-----------|----------|-----------|
| C | -5.327057 | 3.401938 | 0.059876  |
| H | -4.772029 | 3.696318 | -1.997780 |
| H | -5.754603 | 2.801551 | 2.093300  |
| C | -0.070271 | 3.699999 | -0.174307 |
| C | -0.013570 | 3.576195 | 1.218639  |
| C | 1.068374  | 4.073039 | 1.942373  |
| C | 2.097884  | 4.697317 | 1.234636  |
| C | 2.039170  | 4.825644 | -0.163838 |
| C | 0.950924  | 4.329111 | -0.884534 |
| C | -1.348002 | 3.102990 | -0.678490 |
| C | -2.064305 | 2.515779 | 0.502945  |
| C | -1.258871 | 2.901804 | 1.710048  |
| H | 1.098423  | 3.972545 | 3.023301  |
| H | 2.957920  | 5.092518 | 1.768786  |
| H | 2.853721  | 5.319839 | -0.686951 |
| H | 0.889835  | 4.426192 | -1.964730 |
| O | -1.558683 | 2.748808 | 2.886887  |
| O | -1.719922 | 3.134705 | -1.847207 |
| H | -3.101866 | 2.837770 | 0.580641  |
| H | -5.448140 | 4.464102 | 0.253984  |
| H | -5.608942 | 0.387355 | 1.578066  |
| C | -4.434489 | 1.210883 | -2.925276 |
| H | -5.151200 | 1.594659 | -3.661831 |
| H | -4.372349 | 0.127375 | -3.046645 |
| H | -3.455540 | 1.646600 | -3.154575 |

#### TS2-A

B3LYP SCF energy in gas phase: -3456.010370 a.u.

M06-L SCF energy in 1,4-dioxane: -3455.965465 a.u.

|   |          |           |           |
|---|----------|-----------|-----------|
| C | 3.340050 | 0.052926  | 0.411617  |
| C | 4.452525 | -0.200332 | -0.403190 |
| C | 5.587541 | -0.455039 | 0.414301  |
| C | 6.692440 | -0.717296 | -0.395150 |
| N | 3.786382 | -0.045013 | 1.731976  |
| C | 5.183136 | -0.358190 | 1.799045  |
| O | 5.782580 | -0.485289 | 2.865966  |
| C | 3.037703 | 0.154810  | 2.958895  |
| H | 2.237770 | -0.584901 | 3.069427  |
| H | 3.753685 | 0.029170  | 3.773713  |
| H | 2.607016 | 1.159943  | 3.008123  |
| C | 2.009137 | 0.352198  | -0.009731 |
| C | 1.610240 | 0.497612  | -1.337958 |



|    |           |           |           |   |           |           |           |
|----|-----------|-----------|-----------|---|-----------|-----------|-----------|
| S  | 0.604095  | 0.578877  | 1.047160  | H | -0.650068 | -3.038563 | 2.938964  |
| C  | 0.246663  | 0.792518  | -1.500708 | H | -0.590530 | -3.774377 | 1.336558  |
| H  | 2.313762  | 0.390331  | -2.159147 | H | -2.616462 | -1.878763 | 3.801093  |
| C  | -0.487146 | 0.834440  | -0.308788 | H | -2.408413 | -0.642250 | 2.541797  |
| H  | -0.209170 | 0.987879  | -2.463974 | H | -3.977488 | -1.443753 | 2.758311  |
| C  | 8.033161  | -1.026122 | 0.035845  | C | -4.782212 | -2.316235 | -0.050056 |
| C  | 8.444801  | -1.102626 | 1.359406  | C | -5.657145 | -1.213899 | -0.207610 |
| S  | 9.394094  | -1.366477 | -1.033619 | C | -5.353349 | -3.603203 | 0.033083  |
| C  | 9.816785  | -1.425776 | 1.505704  | C | -7.045866 | -1.448014 | -0.259947 |
| H  | 7.758804  | -0.928037 | 2.182496  | C | -5.265600 | 0.225209  | -0.411889 |
| C  | 10.460306 | -1.597866 | 0.307416  | C | -6.727598 | -3.816455 | -0.024468 |
| H  | 10.309089 | -1.526841 | 2.466783  | H | -4.711889 | -4.464723 | 0.155038  |
| H  | 11.498383 | -1.846221 | 0.130254  | C | -7.584427 | -2.726409 | -0.167866 |
| N  | 6.249676  | -0.624810 | -1.714319 | H | -7.707136 | -0.595870 | -0.391465 |
| C  | 7.001061  | -0.799021 | -2.942674 | C | -5.585215 | 1.221202  | 0.549006  |
| H  | 6.290246  | -0.631624 | -3.754752 | C | -4.854556 | 0.627329  | -1.702241 |
| H  | 7.816407  | -0.072468 | -3.024375 | H | -7.121634 | -4.826744 | 0.043475  |
| H  | 7.409395  | -1.811764 | -3.027004 | H | -8.660468 | -2.868712 | -0.217600 |
| C  | 4.850778  | -0.301102 | -1.783252 | C | -5.497913 | 2.567093  | 0.169312  |
| O  | 4.256906  | -0.166165 | -2.854975 | C | -4.780530 | 1.975948  | -2.059253 |
| Pd | -2.434516 | 0.251865  | -0.225890 | C | -5.111900 | 2.949672  | -1.117935 |
| P  | -2.932243 | -2.080547 | 0.047273  | H | -5.748826 | 3.331405  | 0.900922  |
| C  | -2.201507 | -3.194212 | -1.350695 | H | -4.458523 | 2.256379  | -3.056687 |
| C  | -2.277330 | -4.718690 | -1.142557 | C | -0.482364 | 4.188537  | 0.842866  |
| C  | -2.966368 | -2.822966 | -2.639497 | C | -0.444617 | 4.346415  | -0.548675 |
| C  | -0.719405 | -2.806127 | -1.546777 | C | 0.261745  | 5.393807  | -1.136728 |
| H  | -1.752257 | -5.043510 | -0.239721 | C | 0.939254  | 6.277878  | -0.294285 |
| H  | -3.302820 | -5.094811 | -1.106913 | C | 0.900242  | 6.120442  | 1.101726  |
| H  | -1.788297 | -5.211311 | -1.993464 | C | 0.183865  | 5.074507  | 1.687405  |
| H  | -2.897131 | -1.750005 | -2.850524 | C | -1.325797 | 3.008500  | 1.194791  |
| H  | -2.518307 | -3.355886 | -3.487915 | C | -1.741875 | 2.361993  | -0.105833 |
| H  | -4.023925 | -3.100933 | -2.588950 | C | -1.268714 | 3.286569  | -1.203074 |
| H  | -0.334400 | -3.324917 | -2.434627 | H | 0.279741  | 5.506681  | -2.216487 |
| H  | -0.592878 | -1.732492 | -1.700238 | H | 1.505472  | 7.101598  | -0.720432 |
| H  | -0.092564 | -3.100046 | -0.701291 | H | 1.436373  | 6.825631  | 1.731032  |
| C  | -2.463970 | -2.719997 | 1.807366  | H | 0.141731  | 4.944073  | 2.764532  |
| C  | -3.135786 | -4.026479 | 2.271125  | O | -1.531413 | 3.215644  | -2.392145 |
| C  | -0.934352 | -2.893716 | 1.888248  | O | -1.645307 | 2.660348  | 2.319843  |
| C  | -2.892579 | -1.595983 | 2.776541  | H | -2.848163 | 2.283321  | -0.135420 |
| H  | -4.220479 | -3.925103 | 2.359708  | H | -5.070321 | 4.002784  | -1.381533 |
| H  | -2.918013 | -4.876161 | 1.617785  | H | -4.661241 | -0.135887 | -2.450014 |
| H  | -2.749614 | -4.277566 | 3.267981  | C | -5.996461 | 0.876871  | 1.962903  |
| H  | -0.397563 | -2.016757 | 1.517782  | H | -6.474755 | 1.734021  | 2.446660  |

|                                  |                   |           |           |   |          |           |           |
|----------------------------------|-------------------|-----------|-----------|---|----------|-----------|-----------|
| H                                | -6.689348         | 0.031439  | 2.001549  | C | 2.606760 | -2.370214 | 2.533928  |
| H                                | -5.120457         | 0.608459  | 2.566032  | C | 3.661612 | -3.121116 | 3.371701  |
|                                  |                   |           |           | C | 1.734360 | -1.536741 | 3.492978  |
| <b>IM1-B</b>                     |                   |           |           | C | 1.687045 | -3.409219 | 1.854006  |
| B3LYP SCF energy in gas phase:   | -3287.518286 a.u. |           |           | H | 4.284660 | -3.787992 | 2.771436  |
| M06-L SCF energy in 1,4-dioxane: | -3287.468758 a.u. |           |           | H | 4.316027 | -2.450845 | 3.936190  |
|                                  |                   |           |           | H | 3.138154 | -3.746850 | 4.107187  |
| C                                | -3.106350         | -1.442278 | -0.750066 | H | 0.918295 | -1.039341 | 2.963441  |
| C                                | -3.965985         | -0.366467 | -0.488693 | H | 1.283086 | -2.208655 | 4.234982  |
| C                                | -5.214108         | -0.866038 | -0.024482 | H | 2.311509 | -0.781137 | 4.034328  |
| C                                | -6.057663         | 0.201438  | 0.276798  | H | 1.222713 | -4.034742 | 2.628604  |
| N                                | -3.816010         | -2.602961 | -0.449180 | H | 0.890971 | -2.925053 | 1.282121  |
| C                                | -5.144533         | -2.310087 | 0.006017  | H | 2.227436 | -4.074096 | 1.175295  |
| O                                | -5.946963         | -3.188461 | 0.314796  | C | 4.839944 | -1.969095 | 0.335082  |
| C                                | -3.404383         | -3.986430 | -0.615872 | C | 6.105054 | -2.005749 | 1.214140  |
| H                                | -2.590297         | -4.250763 | 0.066611  | C | 4.504520 | -3.395961 | -0.146030 |
| H                                | -4.279091         | -4.593876 | -0.375037 | C | 5.158398 | -1.114315 | -0.906724 |
| H                                | -3.094467         | -4.187351 | -1.645827 | H | 6.438544 | -1.001161 | 1.489098  |
| C                                | -1.765675         | -1.384218 | -1.255485 | H | 5.980559 | -2.591928 | 2.127498  |
| C                                | -1.159944         | -0.222353 | -1.696650 | H | 6.915580 | -2.471764 | 0.637891  |
| S                                | -0.626341         | -2.756017 | -1.319800 | H | 3.595713 | -3.417920 | -0.753995 |
| C                                | 0.204949          | -0.363127 | -2.092537 | H | 5.329261 | -3.759311 | -0.773328 |
| H                                | -1.693396         | 0.722211  | -1.721762 | H | 4.392191 | -4.103110 | 0.680075  |
| C                                | 0.702644          | -1.683828 | -1.847971 | H | 6.008489 | -1.559273 | -1.441269 |
| H                                | 0.685806          | 0.332112  | -2.773478 | H | 4.308892 | -1.070176 | -1.593480 |
| C                                | -7.406834         | 0.130728  | 0.778979  | H | 5.440095 | -0.093894 | -0.632982 |
| C                                | -8.096549         | -1.046767 | 1.035023  | C | 3.850933 | 0.351278  | 2.008123  |
| S                                | -8.428429         | 1.516967  | 1.160174  | C | 3.366058 | 1.631567  | 1.628907  |
| C                                | -9.409365         | -0.836125 | 1.524284  | C | 4.745746 | 0.272069  | 3.093593  |
| H                                | -7.647556         | -2.021084 | 0.868948  | C | 3.807244 | 2.754810  | 2.356834  |
| C                                | -9.731846         | 0.491098  | 1.644753  | C | 2.388932 | 1.956985  | 0.513213  |
| H                                | -10.090917        | -1.640871 | 1.776939  | C | 5.168664 | 1.396214  | 3.797933  |
| H                                | -10.659247        | 0.929641  | 1.988711  | H | 5.122155 | -0.694982 | 3.399754  |
| N                                | -5.339220         | 1.366204  | -0.000560 | C | 4.694147 | 2.651757  | 3.424430  |
| C                                | -5.764677         | 2.748006  | 0.123994  | H | 3.429741 | 3.732268  | 2.071112  |
| H                                | -4.917673         | 3.354726  | -0.202450 | C | 2.883305 | 2.518530  | -0.706513 |
| H                                | -6.627361         | 2.963218  | -0.515009 | C | 0.995469 | 2.068234  | 0.800715  |
| H                                | -6.009009         | 3.002325  | 1.160612  | H | 5.858791 | 1.288134  | 4.630285  |
| C                                | -4.022354         | 1.072244  | -0.482638 | H | 5.005535 | 3.544377  | 3.960287  |
| O                                | -3.217935         | 1.958769  | -0.791810 | C | 1.990410 | 3.128762  | -1.590562 |
| Pd                               | 1.615610          | -0.442846 | -0.411774 | C | 0.146822 | 2.682595  | -0.138040 |
| Br                               | 1.947486          | -2.557477 | -3.155604 | C | 0.617985 | 3.227418  | -1.330058 |
| P                                | 3.261078          | -1.190436 | 1.135672  | H | 2.384396 | 3.564207  | -2.504725 |

|                                                    |           |           |           |    |            |           |           |
|----------------------------------------------------|-----------|-----------|-----------|----|------------|-----------|-----------|
| H                                                  | -0.915629 | 2.748808  | 0.075817  | C  | -3.489184  | -3.952929 | -0.366153 |
| C                                                  | 0.411507  | 1.710829  | 2.168443  | H  | -2.655506  | -4.120105 | 0.324466  |
| C                                                  | -0.867904 | 0.859477  | 2.080429  | H  | -4.319741  | -4.599612 | -0.076090 |
| C                                                  | 0.146587  | 2.991787  | 2.988757  | H  | -3.171744  | -4.200482 | -1.383837 |
| H                                                  | 1.160206  | 1.130344  | 2.712720  | C  | -2.056875  | -1.311444 | -1.271566 |
| H                                                  | -0.694982 | -0.060113 | 1.510870  | C  | -1.551069  | -0.161070 | -1.885159 |
| H                                                  | -1.205896 | 0.586149  | 3.087639  | S  | -0.788141  | -2.533069 | -1.129994 |
| H                                                  | -1.685386 | 1.398579  | 1.591195  | C  | -0.205182  | -0.246500 | -2.260480 |
| H                                                  | 1.059716  | 3.582589  | 3.118094  | H  | -2.163591  | 0.724352  | -2.017622 |
| H                                                  | -0.599218 | 3.626472  | 2.496267  | C  | 0.403657   | -1.436466 | -1.839691 |
| H                                                  | -0.233647 | 2.734869  | 3.984994  | H  | 0.332473   | 0.522745  | -2.799540 |
| C                                                  | 4.374944  | 2.567332  | -1.040090 | C  | -7.693842  | 0.011735  | 0.876093  |
| C                                                  | 4.945328  | 3.988330  | -0.843576 | C  | -8.296296  | -1.181628 | 1.252792  |
| C                                                  | 4.685558  | 2.070554  | -2.465570 | S  | -8.773672  | 1.362585  | 1.222166  |
| H                                                  | 4.897680  | 1.911116  | -0.337771 | C  | -9.589770  | -1.010152 | 1.803845  |
| H                                                  | 4.813087  | 4.338208  | 0.184975  | H  | -7.798631  | -2.138553 | 1.129274  |
| H                                                  | 6.018344  | 4.004247  | -1.070439 | C  | -9.983613  | 0.302617  | 1.852228  |
| H                                                  | 4.450444  | 4.705632  | -1.508948 | H  | -10.207050 | -1.831280 | 2.151099  |
| H                                                  | 4.250414  | 1.084836  | -2.653439 | H  | -10.915342 | 0.711883  | 2.219841  |
| H                                                  | 4.299735  | 2.758673  | -3.226390 | N  | -5.754016  | 1.299390  | -0.113664 |
| H                                                  | 5.769963  | 2.000392  | -2.612641 | C  | -6.265527  | 2.657521  | -0.089816 |
| C                                                  | -0.332063 | 3.949339  | -2.278417 | H  | -5.481315  | 3.282659  | -0.521572 |
| C                                                  | -0.247613 | 3.426976  | -3.724610 | H  | -7.174986  | 2.755812  | -0.691416 |
| C                                                  | -0.097273 | 5.473111  | -2.235697 | H  | -6.468424  | 2.993833  | 0.932286  |
| H                                                  | -1.350480 | 3.756945  | -1.919147 | C  | -4.444449  | 1.046198  | -0.641081 |
| H                                                  | -0.460539 | 2.353569  | -3.775497 | O  | -3.718058  | 1.945956  | -1.070109 |
| H                                                  | -0.977797 | 3.943154  | -4.358939 | Pd | 1.935183   | -1.179438 | -0.565343 |
| H                                                  | 0.744436  | 3.594897  | -4.161015 | Br | 1.878802   | -2.377694 | -3.123379 |
| H                                                  | -0.200431 | 5.861355  | -1.216343 | P  | 3.729263   | -1.058904 | 1.016223  |
| H                                                  | 0.908423  | 5.728994  | -2.591598 | C  | 3.360254   | -2.304203 | 2.467327  |
| H                                                  | -0.820973 | 5.994010  | -2.874196 | C  | 4.564783   | -2.884519 | 3.235754  |
| <b>TS1-B</b>                                       |           |           |           | C  | 2.430814   | -1.597953 | 3.473763  |
| B3LYP SCF energy in gas phase: -3287.508575 a.u.   |           |           |           | C  | 2.573250   | -3.487225 | 1.856109  |
| M06-L SCF energy in 1,4-dioxane: -3287.455374 a.u. |           |           |           | H  | 5.239765   | -3.457621 | 2.594623  |
| C                                                  | -3.374283 | -1.419044 | -0.727214 | H  | 5.147634   | -2.123709 | 3.761016  |
| C                                                  | -4.297645 | -0.384200 | -0.532448 | H  | 4.186830   | -3.575891 | 4.000909  |
| C                                                  | -5.486237 | -0.917399 | 0.034342  | H  | 1.528484   | -1.217034 | 2.988037  |
| C                                                  | -6.380617 | 0.121307  | 0.294257  | H  | 2.113788   | -2.323270 | 4.234793  |
| N                                                  | -3.988254 | -2.591593 | -0.288076 | H  | 2.924317   | -0.768314 | 3.988154  |
| C                                                  | -5.315417 | -2.345743 | 0.194184  | H  | 2.276075   | -4.173605 | 2.660772  |
| O                                                  | -6.045023 | -3.242184 | 0.612381  | H  | 1.664564   | -3.144566 | 1.349797  |
|                                                    |           |           |           | H  | 3.162625   | -4.059041 | 1.134691  |
|                                                    |           |           |           | C  | 5.371643   | -1.566793 | 0.125781  |

|   |           |           |           |
|---|-----------|-----------|-----------|
| C | 6.683251  | -1.415276 | 0.920084  |
| C | 5.233459  | -3.024243 | -0.362429 |
| C | 5.473629  | -0.659608 | -1.116548 |
| H | 6.880351  | -0.373237 | 1.186352  |
| H | 6.711263  | -2.017000 | 1.831777  |
| H | 7.514247  | -1.751163 | 0.285366  |
| H | 4.305087  | -3.179768 | -0.922249 |
| H | 6.068821  | -3.251950 | -1.037551 |
| H | 5.272415  | -3.749327 | 0.455724  |
| H | 6.362488  | -0.940757 | -1.697306 |
| H | 4.599828  | -0.760605 | -1.767497 |
| H | 5.579968  | 0.392878  | -0.840633 |
| C | 4.102495  | 0.574229  | 1.852439  |
| C | 3.432489  | 1.798232  | 1.570177  |
| C | 5.081624  | 0.579588  | 2.869127  |
| C | 3.783666  | 2.935227  | 2.329267  |
| C | 2.355097  | 2.089159  | 0.544576  |
| C | 5.412356  | 1.716580  | 3.599754  |
| H | 5.604209  | -0.337808 | 3.101513  |
| C | 4.751583  | 2.911418  | 3.327496  |
| H | 3.263362  | 3.864360  | 2.116645  |
| C | 2.708157  | 2.705265  | -0.684571 |
| C | 0.988722  | 2.030911  | 0.918646  |
| H | 6.173684  | 1.662710  | 4.373214  |
| H | 4.982467  | 3.815618  | 3.884298  |
| C | 1.698650  | 3.226365  | -1.503206 |
| C | 0.020120  | 2.562191  | 0.058181  |
| C | 0.347431  | 3.178459  | -1.151391 |
| H | 1.985702  | 3.717452  | -2.428792 |
| H | -1.027882 | 2.513782  | 0.343083  |
| C | 0.534000  | 1.490240  | 2.273181  |
| C | -0.569215 | 0.423126  | 2.144729  |
| C | 0.073771  | 2.635821  | 3.198670  |
| H | 1.394486  | 1.017340  | 2.754234  |
| H | -0.254708 | -0.393830 | 1.484426  |
| H | -0.806533 | 0.000537  | 3.129110  |
| H | -1.495334 | 0.841398  | 1.735784  |
| H | 0.871941  | 3.370735  | 3.351240  |
| H | -0.790069 | 3.161651  | 2.775572  |
| H | -0.218285 | 2.243933  | 4.180791  |
| C | 4.160994  | 2.914267  | -1.114394 |
| C | 4.591988  | 4.384945  | -0.931948 |
| C | 4.424758  | 2.461564  | -2.563517 |

|   |           |          |           |
|---|-----------|----------|-----------|
| H | 4.796451  | 2.311517 | -0.458373 |
| H | 4.493814  | 4.706071 | 0.110084  |
| H | 5.639272  | 4.518836 | -1.229976 |
| H | 3.978871  | 5.053212 | -1.548154 |
| H | 4.081393  | 1.436562 | -2.733379 |
| H | 3.917669  | 3.108526 | -3.288353 |
| H | 5.497949  | 2.505578 | -2.785279 |
| C | -0.737133 | 3.850698 | -1.986913 |
| C | -0.618138 | 3.578583 | -3.496405 |
| C | -0.753349 | 5.370006 | -1.714572 |
| H | -1.700255 | 3.445402 | -1.654086 |
| H | -0.634671 | 2.505745 | -3.717809 |
| H | -1.457039 | 4.040425 | -4.029831 |
| H | 0.305111  | 3.994213 | -3.917831 |
| H | -0.885155 | 5.579339 | -0.647236 |
| H | 0.186931  | 5.836988 | -2.033719 |
| H | -1.572738 | 5.853265 | -2.260689 |

#### IM2-B

B3LYP SCF energy in gas phase: -3287.539204 a.u.

M06-L SCF energy in 1,4-dioxane: -3287.493428 a.u.

|   |           |           |           |
|---|-----------|-----------|-----------|
| C | -3.762911 | -0.995266 | 0.061639  |
| C | -4.895373 | -0.408748 | -0.512989 |
| C | -6.052544 | -0.812958 | 0.208831  |
| C | -7.172396 | -0.173502 | -0.319406 |
| N | -4.212177 | -1.768943 | 1.131447  |
| C | -5.637390 | -1.702036 | 1.272372  |
| O | -6.247162 | -2.321812 | 2.142158  |
| C | -3.442787 | -2.659516 | 1.981859  |
| H | -2.783265 | -2.105310 | 2.658386  |
| H | -4.168756 | -3.217665 | 2.576418  |
| H | -2.842852 | -3.353420 | 1.385494  |
| C | -2.399617 | -0.836925 | -0.347518 |
| C | -1.994036 | -0.224686 | -1.529509 |
| S | -0.968504 | -1.265216 | 0.598949  |
| C | -0.591502 | -0.114335 | -1.658119 |
| H | -2.708165 | 0.145254  | -2.258031 |
| C | 0.122091  | -0.590214 | -0.571999 |
| H | -0.113186 | 0.302150  | -2.537274 |
| C | -8.536520 | -0.295635 | 0.132041  |
| C | -8.958657 | -1.117385 | 1.168006  |
| S | -9.913773 | 0.581099  | -0.534972 |

|    |            |           |           |   |           |           |           |
|----|------------|-----------|-----------|---|-----------|-----------|-----------|
| C  | -10.351887 | -1.041660 | 1.415865  | C | 6.397978  | 1.116394  | 0.843209  |
| H  | -8.264814  | -1.742865 | 1.721215  | C | 4.443272  | 3.015606  | 1.270066  |
| C  | -11.000525 | -0.169931 | 0.579750  | C | 2.564332  | 1.633391  | 0.497579  |
| H  | -10.855184 | -1.614839 | 2.186781  | C | 6.754242  | 2.358073  | 1.360839  |
| H  | -12.053932 | 0.075175  | 0.548931  | H | 7.179545  | 0.386560  | 0.680185  |
| N  | -6.719138  | 0.622747  | -1.371670 | C | 5.766281  | 3.318123  | 1.575685  |
| C  | -7.484181  | 1.461509  | -2.274479 | H | 3.671897  | 3.761028  | 1.440815  |
| H  | -6.761747  | 1.882043  | -2.977433 | C | 2.014246  | 2.358656  | -0.621085 |
| H  | -8.230365  | 0.882828  | -2.829016 | C | 1.708804  | 1.399952  | 1.634188  |
| H  | -7.982704  | 2.279261  | -1.743021 | H | 7.793913  | 2.571060  | 1.593336  |
| C  | -5.295253  | 0.516463  | -1.542116 | H | 6.020962  | 4.294096  | 1.979633  |
| O  | -4.686964  | 1.129750  | -2.420934 | C | 0.685076  | 2.775938  | -0.585543 |
| Pd | 2.126554   | -0.675844 | -0.316664 | C | 0.383082  | 1.839837  | 1.594990  |
| Br | 1.815686   | -2.911143 | -1.427702 | C | -0.148929 | 2.547908  | 0.515519  |
| P  | 4.566785   | -0.879636 | -0.112976 | H | 0.292358  | 3.321188  | -1.436659 |
| C  | 5.246497   | -2.156729 | 1.180965  | H | -0.251890 | 1.654658  | 2.457048  |
| C  | 6.768372   | -2.404132 | 1.133246  | C | 2.242812  | 0.844931  | 2.953579  |
| C  | 4.891768   | -1.648317 | 2.591797  | C | 1.449283  | -0.375345 | 3.455290  |
| C  | 4.516668   | -3.502837 | 0.978591  | C | 2.280448  | 1.945136  | 4.036144  |
| H  | 7.107146   | -2.805821 | 0.176429  | H | 3.273559  | 0.526984  | 2.788548  |
| H  | 7.351000   | -1.507718 | 1.361301  | H | 1.432795  | -1.176484 | 2.708649  |
| H  | 7.017996   | -3.148529 | 1.900787  | H | 1.902425  | -0.767304 | 4.373833  |
| H  | 3.811885   | -1.547996 | 2.721419  | H | 0.409310  | -0.118786 | 3.684841  |
| H  | 5.240156   | -2.385502 | 3.326782  | H | 2.888368  | 2.798751  | 3.719100  |
| H  | 5.368355   | -0.692199 | 2.828429  | H | 1.274468  | 2.313545  | 4.266617  |
| H  | 4.854516   | -4.199857 | 1.757246  | H | 2.712559  | 1.547885  | 4.962205  |
| H  | 3.432738   | -3.395908 | 1.061679  | C | 2.870873  | 2.795063  | -1.809120 |
| H  | 4.725603   | -3.959854 | 0.009969  | C | 3.082287  | 4.324289  | -1.820068 |
| C  | 5.483672   | -1.118899 | -1.806091 | C | 2.287272  | 2.329447  | -3.156907 |
| C  | 6.928176   | -0.583257 | -1.841737 | H | 3.857730  | 2.338112  | -1.696380 |
| C  | 5.483961   | -2.608492 | -2.211511 | H | 3.567296  | 4.671206  | -0.902118 |
| C  | 4.668394   | -0.345423 | -2.861312 | H | 3.717507  | 4.611201  | -2.666475 |
| H  | 6.972212   | 0.495529  | -1.667975 | H | 2.129695  | 4.856495  | -1.920856 |
| H  | 7.590210   | -1.078534 | -1.126684 | H | 2.124177  | 1.247959  | -3.170289 |
| H  | 7.337590   | -0.770207 | -2.843078 | H | 1.330294  | 2.817705  | -3.372963 |
| H  | 4.479163   | -3.036580 | -2.193391 | H | 2.974899  | 2.582119  | -3.972657 |
| H  | 5.861283   | -2.682119 | -3.239924 | C | -1.573854 | 3.083901  | 0.607107  |
| H  | 6.139929   | -3.218169 | -1.585139 | C | -2.195878 | 3.500549  | -0.732514 |
| H  | 5.133379   | -0.491627 | -3.845267 | C | -1.632526 | 4.255237  | 1.613659  |
| H  | 3.636850   | -0.702163 | -2.919696 | H | -2.186892 | 2.267962  | 1.014603  |
| H  | 4.659967   | 0.729250  | -2.661597 | H | -2.194448 | 2.681688  | -1.457050 |
| C  | 5.063464   | 0.791121  | 0.526302  | H | -3.239222 | 3.795168  | -0.578672 |
| C  | 4.061342   | 1.763171  | 0.747476  | H | -1.676643 | 4.362175  | -1.170845 |

|   |           |          |          |
|---|-----------|----------|----------|
| H | -1.247313 | 3.967741 | 2.597851 |
| H | -1.037422 | 5.104195 | 1.254998 |
| H | -2.666159 | 4.596810 | 1.740401 |

**IM3-B**

B3LYP SCF energy in gas phase: -3784.025744 a.u.

M06-L SCF energy in 1,4-dioxane: -3783.993039 a.u.

|    |           |           |           |
|----|-----------|-----------|-----------|
| C  | 4.001625  | 0.325508  | -0.105032 |
| C  | 5.207298  | 0.676716  | 0.533989  |
| C  | 6.301690  | 0.145430  | -0.202072 |
| C  | 7.497078  | 0.474079  | 0.431859  |
| N  | 4.362225  | -0.417992 | -1.234707 |
| C  | 5.777004  | -0.562856 | -1.350769 |
| O  | 6.311601  | -1.176539 | -2.275610 |
| C  | 3.496119  | -0.973410 | -2.258058 |
| H  | 2.900943  | -0.193213 | -2.742187 |
| H  | 4.154832  | -1.437511 | -2.994788 |
| H  | 2.821551  | -1.730202 | -1.847122 |
| C  | 2.674630  | 0.645646  | 0.293230  |
| C  | 2.353212  | 1.437620  | 1.400480  |
| S  | 1.162743  | 0.111788  | -0.472700 |
| C  | 0.971590  | 1.593314  | 1.604568  |
| H  | 3.120960  | 1.880300  | 2.028660  |
| C  | 0.154603  | 0.909441  | 0.703065  |
| H  | 0.557969  | 2.234170  | 2.374786  |
| C  | 8.832752  | 0.124721  | 0.011969  |
| C  | 9.149948  | -0.604251 | -1.125302 |
| S  | 10.313380 | 0.558905  | 0.870853  |
| C  | 10.543125 | -0.806190 | -1.298491 |
| H  | 8.380882  | -0.971921 | -1.797669 |
| C  | 11.300624 | -0.240371 | -0.306712 |
| H  | 10.967378 | -1.353697 | -2.133726 |
| H  | 12.376714 | -0.241822 | -0.194500 |
| N  | 7.150085  | 1.212450  | 1.564329  |
| C  | 8.012824  | 1.812485  | 2.560285  |
| H  | 7.345790  | 2.314436  | 3.265354  |
| H  | 8.601575  | 1.059968  | 3.097200  |
| H  | 8.691497  | 2.551198  | 2.119243  |
| C  | 5.722610  | 1.372878  | 1.680742  |
| O  | 5.209830  | 1.999708  | 2.611974  |
| Pd | -1.843837 | 1.007319  | 0.522197  |
| Br | -4.371155 | 1.666730  | 0.123593  |

|   |           |           |           |
|---|-----------|-----------|-----------|
| P | -2.474923 | -1.002242 | 2.143203  |
| C | -1.015835 | -1.664632 | 3.262542  |
| C | -1.337406 | -2.858563 | 4.187286  |
| C | 0.090727  | -2.150094 | 2.314645  |
| C | -0.459827 | -0.503639 | 4.111683  |
| H | -2.086584 | -2.640413 | 4.947850  |
| H | -1.661389 | -3.738031 | 3.624360  |
| H | -0.412411 | -3.131992 | 4.713968  |
| H | 0.430123  | -1.370902 | 1.635840  |
| H | 0.953568  | -2.482404 | 2.908373  |
| H | -0.249798 | -3.002117 | 1.725270  |
| H | 0.475251  | -0.831997 | 4.586069  |
| H | -0.226804 | 0.370588  | 3.502529  |
| H | -1.139399 | -0.199249 | 4.911521  |
| C | -3.843779 | -0.322424 | 3.404218  |
| C | -3.909806 | -0.912498 | 4.834603  |
| C | -3.526441 | 1.182290  | 3.588324  |
| C | -5.249360 | -0.477290 | 2.783912  |
| H | -4.168048 | -1.973556 | 4.880341  |
| H | -2.993741 | -0.757455 | 5.407863  |
| H | -4.709883 | -0.377701 | 5.364280  |
| H | -3.584210 | 1.732047  | 2.650023  |
| H | -4.266940 | 1.613751  | 4.276558  |
| H | -2.536436 | 1.345330  | 4.024485  |
| H | -5.957928 | 0.109366  | 3.385339  |
| H | -5.293669 | -0.094927 | 1.764243  |
| H | -5.591201 | -1.516354 | 2.790632  |
| C | -3.178969 | -2.634801 | 1.452805  |
| C | -3.040522 | -3.190283 | 0.142656  |
| C | -3.900462 | -3.400260 | 2.395394  |
| C | -3.635209 | -4.448626 | -0.104069 |
| C | -2.299285 | -2.657396 | -1.069983 |
| C | -4.477618 | -4.635637 | 2.122539  |
| H | -4.007589 | -3.019165 | 3.397978  |
| C | -4.343595 | -5.171781 | 0.847047  |
| H | -3.528766 | -4.859657 | -1.102533 |
| C | -2.949824 | -1.813046 | -2.015607 |
| C | -1.027418 | -3.200322 | -1.395182 |
| H | -5.018814 | -5.164792 | 2.902891  |
| H | -4.778739 | -6.134522 | 0.590737  |
| C | -2.247548 | -1.422661 | -3.161013 |
| C | -0.387192 | -2.788614 | -2.572399 |
| C | -0.960910 | -1.878202 | -3.454341 |

|   |           |           |           |
|---|-----------|-----------|-----------|
| H | -2.723329 | -0.736522 | -3.850194 |
| H | 0.589110  | -3.202612 | -2.813278 |
| C | -2.970772 | 4.211978  | -1.659342 |
| C | -2.649786 | 4.793799  | -0.431579 |
| C | -3.244018 | 5.984495  | -0.020772 |
| C | -4.174918 | 6.581432  | -0.874142 |
| C | -4.493157 | 5.998657  | -2.112703 |
| C | -3.889456 | 4.806874  | -2.520315 |
| C | -2.151173 | 2.969227  | -1.855239 |
| C | -1.335033 | 2.765267  | -0.607567 |
| C | -1.597893 | 3.972083  | 0.254889  |
| H | -2.980144 | 6.424981  | 0.936671  |
| H | -4.659014 | 7.510875  | -0.582695 |
| H | -5.218760 | 6.486485  | -2.759800 |
| H | -4.123141 | 4.344638  | -3.475166 |
| O | -1.050448 | 4.298196  | 1.301705  |
| O | -2.114248 | 2.331408  | -2.900477 |
| H | -0.279417 | 2.642590  | -0.846679 |
| C | -0.223050 | -1.416609 | -4.704059 |
| C | 0.135009  | 0.080455  | -4.623498 |
| C | -1.011057 | -1.727365 | -5.991221 |
| H | 0.717618  | -1.984512 | -4.753016 |
| H | 0.780714  | 0.280807  | -3.762086 |
| H | 0.661576  | 0.401317  | -5.532073 |
| H | -0.756212 | 0.703467  | -4.497011 |
| H | -1.251795 | -2.794620 | -6.063444 |
| H | -1.953109 | -1.168132 | -6.025208 |
| H | -0.427576 | -1.446907 | -6.877234 |
| C | -0.352384 | -4.316646 | -0.589335 |
| C | 1.154166  | -4.086123 | -0.353438 |
| C | -0.545361 | -5.686012 | -1.279067 |
| H | -0.839032 | -4.380212 | 0.388187  |
| H | 1.359244  | -3.083562 | 0.029814  |
| H | 1.538891  | -4.816943 | 0.368727  |
| H | 1.729625  | -4.216007 | -1.277701 |
| H | -1.602667 | -5.945172 | -1.387047 |
| H | -0.098116 | -5.680431 | -2.280283 |
| H | -0.060329 | -6.480740 | -0.697325 |
| C | -4.424009 | -1.404027 | -1.895937 |
| C | -5.365077 | -2.566632 | -2.292240 |
| C | -4.804157 | -0.186974 | -2.759171 |
| H | -4.624281 | -1.138294 | -0.853051 |
| H | -5.277635 | -3.431737 | -1.632405 |

|   |           |           |           |
|---|-----------|-----------|-----------|
| H | -6.407568 | -2.225559 | -2.257192 |
| H | -5.155678 | -2.896348 | -3.318369 |
| H | -4.105294 | 0.642603  | -2.643137 |
| H | -4.859651 | -0.458320 | -3.822716 |
| H | -5.793946 | 0.171226  | -2.457993 |

#### IM4-B

B3LYP SCF energy in gas phase: -3770.535365 a.u.

M06-L SCF energy in 1,4-dioxane: -3770.483507 a.u.

|   |            |           |           |
|---|------------|-----------|-----------|
| C | -4.067015  | -0.120512 | -0.378309 |
| C | -5.181665  | -0.094214 | 0.466897  |
| C | -6.365088  | -0.240717 | -0.309295 |
| C | -7.474526  | -0.241454 | 0.534650  |
| N | -4.554675  | -0.275680 | -1.676187 |
| C | -5.986406  | -0.354644 | -1.699760 |
| O | -6.625300  | -0.484067 | -2.743058 |
| C | -3.813386  | -0.305158 | -2.923505 |
| H | -3.157049  | -1.179713 | -2.983034 |
| H | -4.559520  | -0.366202 | -3.718384 |
| H | -3.216177  | 0.602755  | -3.054290 |
| C | -2.688072  | -0.015568 | -0.001725 |
| C | -2.236135  | 0.218831  | 1.291813  |
| S | -1.289729  | -0.185329 | -1.075009 |
| C | -0.827100  | 0.262592  | 1.404982  |
| H | -2.921418  | 0.347530  | 2.124734  |
| C | -0.150092  | 0.032918  | 0.218081  |
| H | -0.321701  | 0.472977  | 2.340964  |
| C | -8.858545  | -0.373105 | 0.151584  |
| C | -9.311505  | -0.504396 | -1.153909 |
| S | -10.226439 | -0.398106 | 1.264607  |
| C | -10.720225 | -0.621655 | -1.252820 |
| H | -8.628705  | -0.515255 | -1.997909 |
| C | -11.350161 | -0.581454 | -0.035676 |
| H | -11.247718 | -0.731601 | -2.193981 |
| H | -12.409077 | -0.647646 | 0.176530  |
| N | -6.989085  | -0.092314 | 1.833121  |
| C | -7.727236  | -0.015421 | 3.079558  |
| H | -6.978769  | 0.118441  | 3.863540  |
| H | -8.414399  | 0.837189  | 3.090212  |
| H | -8.288593  | -0.935365 | 3.274412  |
| C | -5.554738  | 0.008578  | 1.854991  |
| O | -4.920140  | 0.155750  | 2.899994  |

|    |           |           |           |   |           |           |           |
|----|-----------|-----------|-----------|---|-----------|-----------|-----------|
| Pd | 1.833192  | -0.018441 | -0.013887 | C | 4.927430  | 2.678926  | 0.724294  |
| P  | 2.180400  | -2.440353 | -0.208715 | H | 5.504796  | 2.662147  | -1.345373 |
| C  | 1.301311  | -3.635344 | 1.044149  | H | 4.277562  | 2.349101  | 2.735437  |
| C  | 1.471513  | -5.147988 | 0.790968  | C | -0.180829 | 3.251325  | -1.322694 |
| C  | 1.864008  | -3.305369 | 2.440724  | C | -0.237994 | 3.527872  | 0.047809  |
| C  | -0.211599 | -3.323211 | 1.067016  | C | -1.249348 | 4.324100  | 0.580704  |
| H  | 1.162090  | -5.451467 | -0.212372 | C | -2.208225 | 4.836951  | -0.295944 |
| H  | 2.491959  | -5.496106 | 0.965028  | C | -2.148990 | 4.562317  | -1.673040 |
| H  | 0.830447  | -5.686281 | 1.501244  | C | -1.131197 | 3.765900  | -2.202778 |
| H  | 1.696100  | -2.256697 | 2.701212  | C | 1.017162  | 2.399457  | -1.607033 |
| H  | 1.342131  | -3.919108 | 3.186304  | C | 1.669980  | 2.086518  | -0.293414 |
| H  | 2.933610  | -3.522691 | 2.521670  | C | 0.930230  | 2.887553  | 0.735976  |
| H  | -0.667559 | -3.903908 | 1.879648  | H | -1.280481 | 4.533396  | 1.645899  |
| H  | -0.412030 | -2.268766 | 1.257647  | H | -3.012378 | 5.459387  | 0.087586  |
| H  | -0.717551 | -3.607222 | 0.143143  | H | -2.907073 | 4.979107  | -2.331036 |
| C  | 1.860173  | -3.023495 | -2.035799 | H | -1.070286 | 3.549658  | -3.265485 |
| C  | 2.720609  | -4.215998 | -2.496370 | O | 1.223460  | 3.054399  | 1.913433  |
| C  | 0.376232  | -3.386765 | -2.244506 | O | 1.381913  | 2.052982  | -2.726265 |
| C  | 2.191871  | -1.820167 | -2.941618 | H | 2.745607  | 2.263575  | -0.290526 |
| H  | 3.790716  | -3.995385 | -2.463832 | C | 4.011980  | -0.308688 | 2.915279  |
| H  | 2.535011  | -5.123927 | -1.915410 | C | 2.774250  | 0.194747  | 3.679611  |
| H  | 2.462931  | -4.441722 | -3.539437 | C | 5.246499  | -0.330046 | 3.842164  |
| H  | -0.298749 | -2.595322 | -1.912532 | H | 3.816866  | -1.340590 | 2.615440  |
| H  | 0.207550  | -3.534055 | -3.319370 | H | 1.890968  | 0.209224  | 3.034700  |
| H  | 0.096794  | -4.318752 | -1.745119 | H | 2.573378  | -0.459756 | 4.536464  |
| H  | 1.997524  | -2.096457 | -3.986588 | H | 2.910999  | 1.211221  | 4.062615  |
| H  | 1.587631  | -0.938804 | -2.707423 | H | 6.125062  | -0.743127 | 3.335394  |
| H  | 3.244589  | -1.536756 | -2.871144 | H | 5.499234  | 0.678973  | 4.187747  |
| C  | 4.008367  | -2.695898 | 0.073790  | H | 5.045297  | -0.946960 | 4.726056  |
| C  | 4.872393  | -1.608369 | 0.351757  | C | 5.380572  | 0.101642  | -2.064454 |
| C  | 4.561490  | -3.994145 | 0.063810  | C | 6.913512  | 0.092751  | -2.248216 |
| C  | 6.226506  | -1.882076 | 0.637144  | C | 4.713673  | 0.839279  | -3.243610 |
| C  | 4.547487  | -0.126509 | 0.387389  | H | 5.050477  | -0.941685 | -2.085904 |
| C  | 5.902213  | -4.240722 | 0.342326  | H | 7.414384  | -0.496243 | -1.473689 |
| H  | 3.935012  | -4.839524 | -0.179593 | H | 7.173819  | -0.338579 | -3.222164 |
| C  | 6.744259  | -3.172372 | 0.641909  | H | 7.318497  | 1.110940  | -2.214434 |
| H  | 6.880634  | -1.045076 | 0.862168  | H | 3.634968  | 0.959654  | -3.106599 |
| C  | 4.986068  | 0.687636  | -0.708026 | H | 5.141212  | 1.840053  | -3.378098 |
| C  | 4.302485  | 0.497809  | 1.650954  | H | 4.891463  | 0.287905  | -4.174865 |
| H  | 6.280132  | -5.259157 | 0.324227  | C | 5.183995  | 4.165752  | 0.931046  |
| H  | 7.793343  | -3.337587 | 0.871346  | C | 4.268986  | 5.043858  | 0.056430  |
| C  | 5.157589  | 2.059823  | -0.511086 | C | 6.668186  | 4.516501  | 0.707113  |
| C  | 4.475300  | 1.881623  | 1.776015  | H | 4.946300  | 4.388742  | 1.979320  |



|   |          |          |           |
|---|----------|----------|-----------|
| H | 3.214331 | 4.852800 | 0.276842  |
| H | 4.468390 | 6.105359 | 0.244541  |
| H | 4.434376 | 4.857625 | -1.011500 |
| H | 7.321348 | 3.916753 | 1.350852  |
| H | 6.969226 | 4.341554 | -0.332690 |
| H | 6.847700 | 5.574617 | 0.930372  |

**TS2-B**

B3LYP SCF energy in gas phase: -3770.510995 a.u.

M06-L SCF energy in 1,4-dioxane: -3770.459932 a.u.

|   |            |           |           |
|---|------------|-----------|-----------|
| C | -4.044125  | 0.132697  | -0.398797 |
| C | -5.149636  | -0.023383 | 0.448940  |
| C | -6.324586  | -0.189667 | -0.334255 |
| C | -7.423323  | -0.356569 | 0.508106  |
| N | -4.534859  | 0.064891  | -1.705304 |
| C | -5.953634  | -0.134518 | -1.730563 |
| O | -6.591809  | -0.218896 | -2.779116 |
| C | -3.807918  | 0.192776  | -2.954646 |
| H | -3.075439  | -0.611515 | -3.080629 |
| H | -4.555051  | 0.120973  | -3.747762 |
| H | -3.297558  | 1.158502  | -3.026079 |
| C | -2.681084  | 0.322007  | -0.017683 |
| C | -2.231662  | 0.435551  | 1.297530  |
| S | -1.294144  | 0.428219  | -1.116060 |
| C | -0.843628  | 0.614265  | 1.419044  |
| H | -2.916868  | 0.389005  | 2.139676  |
| C | -0.145505  | 0.591551  | 0.206028  |
| H | -0.347104  | 0.776619  | 2.368112  |
| C | -8.796581  | -0.557151 | 0.117494  |
| C | -9.251179  | -0.603995 | -1.193363 |
| S | -10.148970 | -0.783863 | 1.227138  |
| C | -10.648327 | -0.816088 | -1.298711 |
| H | -8.577559  | -0.487690 | -2.036735 |
| C | -11.268655 | -0.932438 | -0.081609 |
| H | -11.174765 | -0.879893 | -2.244774 |
| H | -12.317762 | -1.095999 | 0.126464  |
| N | -6.936845  | -0.293113 | 1.813493  |
| C | -7.665100  | -0.395937 | 3.063693  |
| H | -6.920638  | -0.281220 | 3.854503  |
| H | -8.415895  | 0.395459  | 3.160232  |
| H | -8.152018  | -1.371260 | 3.169194  |
| C | -5.515060  | -0.083261 | 1.840553  |

|    |           |           |           |
|----|-----------|-----------|-----------|
| O  | -4.881585 | 0.009503  | 2.893835  |
| Pd | 1.733111  | -0.164736 | 0.042745  |
| P  | 2.046276  | -2.515005 | -0.312026 |
| C  | 1.099376  | -3.692522 | 0.907427  |
| C  | 0.959959  | -5.170609 | 0.488116  |
| C  | 1.821178  | -3.638431 | 2.268318  |
| C  | -0.317244 | -3.108423 | 1.107361  |
| H  | 0.409318  | -5.295970 | -0.447120 |
| H  | 1.920303  | -5.684915 | 0.397784  |
| H  | 0.391855  | -5.695938 | 1.267247  |
| H  | 1.887324  | -2.614693 | 2.645251  |
| H  | 1.243029  | -4.219854 | 2.998287  |
| H  | 2.829113  | -4.061906 | 2.225752  |
| H  | -0.845408 | -3.714677 | 1.855289  |
| H  | -0.284434 | -2.078522 | 1.469303  |
| H  | -0.915935 | -3.122023 | 0.193677  |
| C  | 1.635747  | -3.002620 | -2.140259 |
| C  | 2.233621  | -4.332350 | -2.637994 |
| C  | 0.104468  | -3.031167 | -2.322072 |
| C  | 2.195831  | -1.873097 | -3.027239 |
| H  | 3.327021  | -4.318280 | -2.630445 |
| H  | 1.893184  | -5.199611 | -2.066689 |
| H  | 1.917055  | -4.485994 | -3.678222 |
| H  | -0.366439 | -2.114193 | -1.957804 |
| H  | -0.118582 | -3.116072 | -3.393880 |
| H  | -0.364919 | -3.885260 | -1.826926 |
| H  | 1.931392  | -2.075219 | -4.074021 |
| H  | 1.786340  | -0.895130 | -2.756126 |
| H  | 3.286031  | -1.818794 | -2.970302 |
| C  | 3.862481  | -2.907720 | -0.082996 |
| C  | 4.824335  | -1.906749 | 0.221403  |
| C  | 4.301805  | -4.244802 | -0.162911 |
| C  | 6.158319  | -2.306716 | 0.440514  |
| C  | 4.606429  | -0.412818 | 0.356597  |
| C  | 5.626386  | -4.615472 | 0.051256  |
| H  | 3.588716  | -5.022117 | -0.399875 |
| C  | 6.565600  | -3.634675 | 0.360517  |
| H  | 6.888098  | -1.540373 | 0.684582  |
| C  | 4.974258  | 0.449693  | -0.717275 |
| C  | 4.370622  | 0.152055  | 1.643264  |
| H  | 5.915685  | -5.660385 | -0.020005 |
| H  | 7.604864  | -3.896803 | 0.539217  |
| C  | 5.051273  | 1.828618  | -0.490984 |

|   |           |           |           |                                  |              |           |           |
|---|-----------|-----------|-----------|----------------------------------|--------------|-----------|-----------|
| C | 4.457893  | 1.540474  | 1.805801  | H                                | 4.460707     | 4.113315  | 1.966005  |
| C | 4.799597  | 2.400802  | 0.760110  | H                                | 3.291233     | 4.580358  | -0.200049 |
| H | 5.339535  | 2.471867  | -1.316475 | H                                | 4.458045     | 5.845051  | 0.219155  |
| H | 4.269198  | 1.966644  | 2.787191  | H                                | 4.852992     | 4.662410  | -1.031295 |
| C | 0.159549  | 3.877421  | -1.110440 | H                                | 6.908762     | 3.628233  | 2.023744  |
| C | 0.106502  | 4.100024  | 0.272126  | H                                | 7.039348     | 4.026168  | 0.302640  |
| C | -0.521824 | 5.227159  | 0.797758  | H                                | 6.599890     | 5.286709  | 1.470489  |
| C | -1.106462 | 6.125322  | -0.097804 |                                  |              |           |           |
| C | -1.052477 | 5.902936  | -1.484470 |                                  |              |           |           |
| C | -0.414163 | 4.776499  | -2.007751 |                                  |              |           |           |
| C | 0.903188  | 2.613936  | -1.389103 |                                  |              |           |           |
| C | 1.237039  | 1.994494  | -0.053137 |                                  |              |           |           |
| C | 0.823179  | 3.003985  | 0.991511  |                                  |              |           |           |
| H | -0.552217 | 5.389161  | 1.870945  |                                  |              |           |           |
| H | -1.610808 | 7.010924  | 0.279036  |                                  |              |           |           |
| H | -1.515186 | 6.620995  | -2.156048 |                                  |              |           |           |
| H | -0.362110 | 4.595148  | -3.077038 |                                  |              |           |           |
| O | 1.062206  | 2.968570  | 2.186653  |                                  |              |           |           |
| O | 1.201087  | 2.181625  | -2.491623 |                                  |              |           |           |
| H | 2.331059  | 1.816765  | 0.027065  |                                  |              |           |           |
| C | 4.134487  | -0.708483 | 2.883334  |                                  |              |           |           |
| C | 2.899676  | -0.267927 | 3.691053  |                                  |              |           |           |
| C | 5.390591  | -0.728572 | 3.779551  |                                  |              |           |           |
| H | 3.962147  | -1.735039 | 2.550331  |                                  |              |           |           |
| H | 2.006343  | -0.233784 | 3.058058  |                                  |              |           |           |
| H | 2.718652  | -0.969106 | 4.514737  |                                  |              |           |           |
| H | 3.028363  | 0.727771  | 4.128815  |                                  |              |           |           |
| H | 6.264892  | -1.103351 | 3.236334  |                                  |              |           |           |
| H | 5.628793  | 0.275755  | 4.149040  |                                  |              |           |           |
| H | 5.228739  | -1.377136 | 4.648937  |                                  |              |           |           |
| C | 5.375648  | -0.076600 | -2.095517 |                                  |              |           |           |
| C | 6.909018  | -0.050569 | -2.274275 |                                  |              |           |           |
| C | 4.698977  | 0.688743  | -3.250258 |                                  |              |           |           |
| H | 5.063119  | -1.123452 | -2.158197 |                                  |              |           |           |
| H | 7.416765  | -0.658904 | -1.519128 |                                  |              |           |           |
| H | 7.183908  | -0.439539 | -3.262179 |                                  |              |           |           |
| H | 7.293846  | 0.973262  | -2.197411 |                                  |              |           |           |
| H | 3.619205  | 0.783343  | -3.104657 |                                  |              |           |           |
| H | 5.108977  | 1.699836  | -3.356763 |                                  |              |           |           |
| H | 4.878868  | 0.169040  | -4.198961 |                                  |              |           |           |
| C | 4.976361  | 3.892113  | 1.022053  |                                  |              |           |           |
| C | 4.357056  | 4.790428  | -0.062018 |                                  |              |           |           |
| C | 6.469933  | 4.227393  | 1.218349  |                                  |              |           |           |
|   |           |           |           | <b>3</b>                         |              |           |           |
|   |           |           |           | B3LYP SCF energy in gas phase:   | -2664.853382 | a.u.      |           |
|   |           |           |           | M06-L SCF energy in 1,4-dioxane: | -2664.780303 | a.u.      |           |
|   |           |           |           | C                                | -1.696891    | -0.389568 | -0.283577 |
|   |           |           |           | C                                | -0.576383    | 0.411990  | -0.059447 |
|   |           |           |           | C                                | 0.576362     | -0.412184 | 0.060015  |
|   |           |           |           | C                                | 1.696880     | 0.389389  | 0.284062  |
|   |           |           |           | N                                | -1.248986    | -1.709394 | -0.303339 |
|   |           |           |           | C                                | 0.169651     | -1.789668 | -0.093849 |
|   |           |           |           | O                                | 0.774999     | -2.859941 | -0.074177 |
|   |           |           |           | C                                | -2.010359    | -2.929561 | -0.503556 |
|   |           |           |           | H                                | -2.494900    | -2.945341 | -1.485137 |
|   |           |           |           | H                                | -1.288540    | -3.746928 | -0.447908 |
|   |           |           |           | H                                | -2.766976    | -3.065108 | 0.275786  |
|   |           |           |           | C                                | -3.056513    | 0.050862  | -0.465398 |
|   |           |           |           | C                                | -3.466545    | 1.376161  | -0.435212 |
|   |           |           |           | S                                | -4.438622    | -1.007962 | -0.735149 |
|   |           |           |           | C                                | -4.857002    | 1.538642  | -0.632939 |
|   |           |           |           | H                                | -2.770067    | 2.192913  | -0.272979 |
|   |           |           |           | C                                | -5.531385    | 0.351029  | -0.803510 |
|   |           |           |           | H                                | -5.355393    | 2.499348  | -0.661252 |
|   |           |           |           | C                                | 3.056531     | -0.050987 | 0.465804  |
|   |           |           |           | C                                | 3.466604     | -1.376278 | 0.435803  |
|   |           |           |           | S                                | 4.438643     | 1.007941  | 0.735125  |
|   |           |           |           | C                                | 4.857099     | -1.538668 | 0.633338  |
|   |           |           |           | H                                | 2.770137     | -2.193084 | 0.273805  |
|   |           |           |           | C                                | 5.531468     | -0.350997 | 0.803570  |
|   |           |           |           | H                                | 5.355530     | -2.499349 | 0.661755  |
|   |           |           |           | N                                | 1.248975     | 1.709214  | 0.303782  |
|   |           |           |           | C                                | 2.010334     | 2.929365  | 0.504152  |
|   |           |           |           | H                                | 1.288484     | 3.746722  | 0.448758  |
|   |           |           |           | H                                | 2.495002     | 2.944945  | 1.485671  |
|   |           |           |           | H                                | 2.766847     | 3.065104  | -0.275261 |
|   |           |           |           | C                                | -0.169667    | 1.789481  | 0.094323  |

|   |            |           |           |
|---|------------|-----------|-----------|
| O | -0.775038  | 2.859742  | 0.074711  |
| C | 6.997015   | -0.153971 | 1.092127  |
| C | 7.640600   | 1.098957  | 0.452349  |
| C | 7.925243   | -1.309449 | 0.643734  |
| C | 8.915928   | 0.681905  | -0.182107 |
| C | 9.078641   | -0.703837 | -0.073585 |
| C | 9.869328   | 1.474262  | -0.823151 |
| C | 10.201336  | -1.342484 | -0.601846 |
| C | 10.992835  | 0.839192  | -1.352421 |
| H | 9.728293   | 2.547768  | -0.902498 |
| C | 11.157008  | -0.553921 | -1.242811 |
| H | 10.313527  | -2.418624 | -0.512679 |
| H | 11.754517  | 1.425000  | -1.859312 |
| H | 12.042525  | -1.018705 | -1.667252 |
| C | -6.996896  | 0.154099  | -1.092328 |
| C | -7.640627  | -1.098850 | -0.452744 |
| C | -7.925123  | 1.309586  | -0.643957 |
| C | -8.915988  | -0.681781 | 0.181636  |
| C | -9.078621  | 0.703978  | 0.073203  |
| C | -9.869486  | -1.474137 | 0.822534  |
| C | -10.201335 | 1.342642  | 0.601405  |
| C | -10.993010 | -0.839050 | 1.351749  |
| H | -9.728514  | -2.547657 | 0.901810  |
| C | -11.157104 | 0.554080  | 1.242226  |
| H | -10.313464 | 2.418794  | 0.512308  |
| H | -11.754768 | -1.424858 | 1.858526  |
| H | -12.042636 | 1.018876  | 1.666620  |
| O | 7.181466   | 2.223211  | 0.481105  |
| O | 7.762385   | -2.494006 | 0.855923  |
| O | -7.762210  | 2.494147  | -0.856086 |
| O | -7.181568  | -2.223133 | -0.481577 |
| H | 7.140731   | -0.045101 | 2.181704  |
| H | -7.140441  | 0.045335  | -2.181936 |

#### 4

B3LYP SCF energy in gas phase: -2664.835688 a.u.

M06-L SCF energy in 1,4-dioxane: -2664.775799 a.u.

|   |           |           |           |
|---|-----------|-----------|-----------|
| C | 1.729667  | 0.361774  | 0.000092  |
| C | 0.570206  | -0.422321 | 0.000328  |
| C | -0.570207 | 0.422301  | 0.000347  |
| C | -1.729667 | -0.361794 | 0.000305  |
| N | 1.309753  | 1.692057  | -0.000023 |

|   |            |           |           |
|---|------------|-----------|-----------|
| C | -0.120435  | 1.796008  | 0.000123  |
| O | -0.705052  | 2.878788  | 0.000062  |
| C | 2.113635   | 2.901626  | -0.000232 |
| H | 2.744112   | 2.965823  | -0.892727 |
| H | 1.406222   | 3.733314  | -0.000495 |
| H | 2.743946   | 2.966269  | 0.892355  |
| C | 3.088122   | -0.100168 | 0.000037  |
| C | 3.462293   | -1.442907 | 0.000071  |
| S | 4.514693   | 0.932728  | -0.000026 |
| C | 4.852204   | -1.636239 | 0.000038  |
| H | 2.729918   | -2.244266 | 0.000124  |
| C | 5.585358   | -0.454233 | -0.000018 |
| H | 5.322695   | -2.611059 | 0.000041  |
| C | -3.088121  | 0.100152  | 0.000286  |
| C | -3.462286  | 1.442892  | 0.000370  |
| S | -4.514696  | -0.932740 | 0.000143  |
| C | -4.852196  | 1.636229  | 0.000279  |
| H | -2.729910  | 2.244250  | 0.000454  |
| C | -5.585355  | 0.454227  | 0.000126  |
| H | -5.322685  | 2.611051  | 0.000314  |
| N | -1.309753  | -1.692078 | 0.000289  |
| C | -2.113635  | -2.901647 | 0.000398  |
| H | -1.406221  | -3.733334 | 0.000492  |
| H | -2.744046  | -2.965972 | 0.892933  |
| H | -2.744011  | -2.966163 | -0.892150 |
| C | 0.120435   | -1.796029 | 0.000287  |
| O | 0.705052   | -2.878809 | 0.000268  |
| C | -7.014129  | 0.290970  | -0.000002 |
| C | -7.715540  | -1.026571 | -0.000321 |
| C | -7.991696  | 1.257127  | 0.000131  |
| C | -9.190982  | -0.733829 | -0.000357 |
| C | -9.343084  | 0.663864  | -0.000077 |
| C | -10.279007 | -1.581103 | -0.000604 |
| C | -10.606595 | 1.237215  | -0.000039 |
| C | -11.566306 | -1.006401 | -0.000567 |
| H | -10.138392 | -2.657974 | -0.000818 |
| C | -11.722815 | 0.378054  | -0.000289 |
| H | -10.758899 | 2.315026  | 0.000175  |
| H | -12.443321 | -1.646882 | -0.000756 |
| H | -12.721295 | 0.805909  | -0.000265 |
| C | 7.014130   | -0.290970 | -0.000065 |
| C | 7.715531   | 1.026578  | -0.000156 |
| C | 7.991705   | -1.257119 | -0.000020 |

|   |           |           |           |
|---|-----------|-----------|-----------|
| C | 9.190974  | 0.733847  | -0.000180 |
| C | 9.343088  | -0.663844 | -0.000089 |
| C | 10.278993 | 1.581130  | -0.000280 |
| C | 10.606604 | -1.237184 | -0.000090 |
| C | 11.566297 | 1.006439  | -0.000280 |
| H | 10.138372 | 2.658000  | -0.000352 |
| C | 11.722817 | -0.378015 | -0.000186 |
| H | 10.758917 | -2.314994 | -0.000028 |
| H | 12.443306 | 1.646929  | -0.000353 |
| H | 12.721301 | -0.805862 | -0.000192 |
| O | -7.199677 | -2.131760 | -0.000529 |
| O | -7.758982 | 2.581758  | 0.000419  |
| O | 7.758999  | -2.581750 | 0.000079  |
| O | 7.199659  | 2.131759  | -0.000212 |
| H | -8.600334 | 3.066427  | 0.000454  |
| H | 8.600353  | -3.066415 | 0.000158  |

**O<sub>2</sub>**

B3LYP SCF energy in gas phase: -150.316605 a.u.

M06-L SCF energy in 1,4-dioxane: -150.319562 a.u.

|   |          |          |           |
|---|----------|----------|-----------|
| O | 0.000000 | 0.000000 | 0.607148  |
| O | 0.000000 | 0.000000 | -0.607148 |

**TS1**

B3LYP SCF energy in gas phase: -2815.136497 a.u.

M06-L SCF energy in 1,4-dioxane: -2815.075540 a.u.

|   |           |           |           |
|---|-----------|-----------|-----------|
| C | 2.138634  | -0.365113 | -0.484079 |
| C | 0.989802  | 0.431876  | -0.314362 |
| C | -0.152085 | -0.388126 | -0.280249 |
| C | -1.304717 | 0.414896  | -0.109205 |
| N | 1.699311  | -1.679712 | -0.554491 |
| C | 0.271584  | -1.766242 | -0.433563 |
| O | -0.330270 | -2.835285 | -0.469747 |
| C | 2.477257  | -2.895860 | -0.727026 |
| H | 3.182317  | -3.039682 | 0.097303  |
| H | 1.758644  | -3.717440 | -0.731628 |
| H | 3.022111  | -2.889935 | -1.676028 |
| C | 3.496938  | 0.085611  | -0.570234 |
| C | 3.894613  | 1.416350  | -0.486379 |
| S | 4.902105  | -0.959422 | -0.774766 |
| C | 5.290556  | 1.590700  | -0.590797 |

|   |            |           |           |
|---|------------|-----------|-----------|
| H | 3.183584   | 2.225475  | -0.352125 |
| C | 5.983361   | 0.408488  | -0.742532 |
| H | 5.785578   | 2.553032  | -0.562283 |
| C | -2.648822  | -0.026377 | -0.023170 |
| C | -3.048685  | -1.374365 | -0.106106 |
| S | -4.057405  | 1.019632  | 0.186667  |
| C | -4.422214  | -1.554931 | 0.002614  |
| H | -2.332946  | -2.178161 | -0.244690 |
| C | -5.139232  | -0.358822 | 0.159329  |
| H | -4.928072  | -2.511154 | -0.035527 |
| N | -0.852464  | 1.731783  | -0.040518 |
| C | -1.627300  | 2.950364  | 0.134533  |
| H | -0.906618  | 3.770067  | 0.137738  |
| H | -2.333982  | 3.095932  | -0.687901 |
| H | -2.170220  | 2.945037  | 1.084403  |
| C | 0.569139   | 1.813125  | -0.161494 |
| O | 1.181912   | 2.875872  | -0.127677 |
| C | -6.556793  | -0.213765 | 0.346007  |
| C | -7.532343  | -1.283393 | -0.102522 |
| C | -7.237946  | 1.106487  | 0.099568  |
| C | -8.826263  | -0.582673 | -0.356572 |
| C | -8.656514  | 0.803151  | -0.238200 |
| C | -10.061833 | -1.131141 | -0.689553 |
| C | -9.716185  | 1.681417  | -0.449723 |
| C | -11.129398 | -0.254250 | -0.898856 |
| H | -10.178964 | -2.206563 | -0.780780 |
| C | -10.959106 | 1.135096  | -0.780244 |
| H | -9.569745  | 2.753384  | -0.358874 |
| H | -12.107576 | -0.649427 | -1.158779 |
| H | -11.808072 | 1.791500  | -0.950113 |
| C | 7.465737   | 0.232526  | -0.935192 |
| C | 8.070903   | -1.063189 | -0.345685 |
| C | 8.358074   | 1.353485  | -0.344424 |
| C | 9.315015   | -0.695773 | 0.373039  |
| C | 9.478535   | 0.694813  | 0.376441  |
| C | 10.238705  | -1.534366 | 0.998510  |
| C | 10.572343  | 1.291617  | 1.004532  |
| C | 11.333626  | -0.940857 | 1.626870  |
| H | 10.097473  | -2.610690 | 0.991532  |
| C | 11.498551  | 0.456408  | 1.629716  |
| H | 10.685470  | 2.371279  | 1.002172  |
| H | 12.071825  | -1.563226 | 2.124659  |
| H | 12.361176  | 0.887562  | 2.129828  |

|   |           |           |           |
|---|-----------|-----------|-----------|
| O | 8.190878  | 2.549867  | -0.465432 |
| O | 7.602619  | -2.177838 | -0.464929 |
| O | -6.720547 | 2.210727  | 0.164868  |
| O | -7.324772 | -2.477337 | -0.232117 |
| H | 7.686048  | 0.203054  | -2.017023 |
| H | -6.765870 | -0.319424 | 1.706706  |
| O | -7.032351 | -0.449734 | 2.902231  |
| O | -8.157332 | -1.053959 | 2.989067  |

**Int-1**

B3LYP SCF energy in gas phase: -2815.172195 a.u.

M06-L SCF energy in 1,4-dioxane: -2815.100577 a.u.

|   |           |           |           |
|---|-----------|-----------|-----------|
| C | 2.232185  | -0.280106 | -0.487073 |
| C | 1.108877  | 0.575216  | -0.376068 |
| C | -0.060546 | -0.186052 | -0.324157 |
| C | -1.191443 | 0.681676  | -0.209533 |
| N | 1.734443  | -1.573376 | -0.503354 |
| C | 0.304868  | -1.589709 | -0.403869 |
| O | -0.345865 | -2.630495 | -0.398820 |
| C | 2.459536  | -2.830509 | -0.604425 |
| H | 3.143044  | -2.964956 | 0.239165  |
| H | 1.705663  | -3.619405 | -0.584630 |
| H | 3.019743  | -2.892136 | -1.542211 |
| C | 3.606405  | 0.107151  | -0.567020 |
| C | 4.061721  | 1.423854  | -0.538535 |
| S | 4.968482  | -1.006739 | -0.693372 |
| C | 5.464380  | 1.532043  | -0.622606 |
| H | 3.384968  | 2.268521  | -0.457216 |
| C | 6.107416  | 0.314262  | -0.703784 |
| H | 6.001769  | 2.471781  | -0.628361 |
| C | -2.537828 | 0.311056  | -0.129074 |
| C | -2.998493 | -1.038636 | -0.153484 |
| S | -3.909872 | 1.427223  | 0.016578  |
| C | -4.360992 | -1.163632 | -0.061545 |
| H | -2.309713 | -1.872918 | -0.238144 |
| C | -5.052053 | 0.082430  | 0.040984  |
| H | -4.905920 | -2.098497 | -0.063042 |
| N | -0.669776 | 1.978786  | -0.194486 |
| C | -1.389442 | 3.240225  | -0.096495 |
| H | -0.632298 | 4.025771  | -0.121570 |
| H | -2.074658 | 3.373688  | -0.938552 |
| H | -1.947454 | 3.308164  | 0.841833  |

|   |            |           |           |
|---|------------|-----------|-----------|
| C | 0.747988   | 1.985827  | -0.294712 |
| O | 1.417200   | 3.013292  | -0.301391 |
| C | -6.417368  | 0.287466  | 0.147014  |
| C | -7.461442  | -0.741240 | 0.177554  |
| C | -7.056897  | 1.609715  | 0.246644  |
| C | -8.765817  | -0.021420 | 0.297867  |
| C | -8.527627  | 1.362916  | 0.338431  |
| C | -10.058046 | -0.533774 | 0.366099  |
| C | -9.571018  | 2.271814  | 0.447769  |
| C | -11.112045 | 0.382787  | 0.476409  |
| H | -10.241492 | -1.605619 | 0.334790  |
| C | -10.874490 | 1.763667  | 0.516724  |
| H | -9.371809  | 3.338803  | 0.477810  |
| H | -12.133370 | 0.016235  | 0.531741  |
| H | -11.714655 | 2.447473  | 0.602582  |
| C | 7.583677   | 0.066603  | -0.855532 |
| C | 8.118472   | -1.232621 | -0.208572 |
| C | 8.513858   | 1.167759  | -0.285239 |
| C | 9.368815   | -0.896418 | 0.513959  |
| C | 9.594459   | 0.485067  | 0.472589  |
| C | 10.245848  | -1.752906 | 1.180980  |
| C | 10.705534  | 1.054213  | 1.095926  |
| C | 11.358127  | -1.187007 | 1.804399  |
| H | 10.056889  | -2.821536 | 1.208820  |
| C | 11.585400  | 0.200823  | 1.762204  |
| H | 10.866833  | 2.127078  | 1.058807  |
| H | 12.061221  | -1.823895 | 2.333593  |
| H | 12.459935  | 0.610363  | 2.259734  |
| O | 8.397700   | 2.365544  | -0.445020 |
| O | 7.597528   | -2.327024 | -0.292055 |
| O | -6.490332  | 2.698377  | 0.252447  |
| O | -7.300745  | -1.967383 | 0.115921  |
| H | 7.825092   | -0.011095 | -1.930485 |
| H | -8.346588  | -3.329348 | 0.134527  |
| O | -8.848216  | -4.196101 | 0.134869  |
| O | -10.130987 | -3.859875 | 0.235477  |

**TS2**

B3LYP SCF energy in gas phase: -2815.137609 a.u.

M06-L SCF energy in 1,4-dioxane: -2815.077847 a.u.

|   |          |           |           |
|---|----------|-----------|-----------|
| C | 2.155178 | -0.363483 | -0.003047 |
| C | 0.993279 | 0.449010  | 0.092219  |

|   |            |           |           |
|---|------------|-----------|-----------|
| C | -0.150284  | -0.364392 | 0.049692  |
| C | -1.305273  | 0.438466  | 0.143553  |
| N | 1.696833   | -1.679239 | -0.104234 |
| C | 0.274289   | -1.750824 | -0.076812 |
| O | -0.344820  | -2.807273 | -0.150928 |
| C | 2.474234   | -2.903959 | -0.222298 |
| H | 3.121427   | -3.050697 | 0.647271  |
| H | 1.750564   | -3.719360 | -0.272564 |
| H | 3.080918   | -2.904826 | -1.132498 |
| C | 3.496708   | 0.066233  | 0.003735  |
| C | 3.894328   | 1.427018  | 0.115775  |
| S | 4.913686   | -0.987587 | -0.122051 |
| C | 5.256694   | 1.610906  | 0.102882  |
| H | 3.166687   | 2.227447  | 0.202397  |
| C | 6.001000   | 0.400654  | -0.021325 |
| H | 5.765585   | 2.563514  | 0.177548  |
| C | -2.669950  | -0.007583 | 0.141227  |
| C | -3.061150  | -1.343236 | 0.035851  |
| S | -4.076211  | 1.044666  | 0.252415  |
| C | -4.453689  | -1.516223 | 0.052866  |
| H | -2.341720  | -2.151210 | -0.051961 |
| C | -5.161404  | -0.324478 | 0.155456  |
| H | -4.953879  | -2.473913 | -0.013702 |
| N | -0.867642  | 1.749886  | 0.243167  |
| C | -1.649836  | 2.970412  | 0.366369  |
| H | -0.929421  | 3.788488  | 0.420174  |
| H | -2.297456  | 3.118615  | -0.502895 |
| H | -2.256140  | 2.964828  | 1.277076  |
| C | 0.565261   | 1.829443  | 0.217091  |
| O | 1.167944   | 2.896307  | 0.292590  |
| C | -6.608076  | -0.156274 | 0.255157  |
| C | -7.552378  | -1.229303 | -0.268445 |
| C | -7.247422  | 1.168285  | -0.116261 |
| C | -8.777635  | -0.525656 | -0.735097 |
| C | -8.607230  | 0.861923  | -0.635408 |
| C | -9.964935  | -1.074069 | -1.215912 |
| C | -9.617636  | 1.742634  | -1.014812 |
| C | -10.980746 | -0.194832 | -1.596681 |
| H | -10.083934 | -2.150572 | -1.289973 |
| C | -10.809582 | 1.196673  | -1.496479 |
| H | -9.472112  | 2.815419  | -0.934752 |
| H | -11.918930 | -0.588453 | -1.977522 |
| H | -11.618825 | 1.854591  | -1.800470 |

|   |           |           |           |
|---|-----------|-----------|-----------|
| C | 7.376526  | 0.262691  | -0.063208 |
| C | 8.088600  | -1.019328 | -0.193290 |
| C | 8.372250  | 1.356348  | 0.015503  |
| C | 9.547983  | -0.696815 | -0.192953 |
| C | 9.713092  | 0.690909  | -0.070368 |
| C | 10.643741 | -1.547064 | -0.290665 |
| C | 10.978780 | 1.265136  | -0.041722 |
| C | 11.920158 | -0.973924 | -0.262531 |
| H | 10.502604 | -2.619599 | -0.384947 |
| C | 12.085536 | 0.414116  | -0.139439 |
| H | 11.092698 | 2.340799  | 0.053852  |
| H | 12.797831 | -1.610259 | -0.336569 |
| H | 13.088823 | 0.830985  | -0.120185 |
| O | 8.176732  | 2.560648  | 0.127913  |
| O | 7.580653  | -2.133633 | -0.283671 |
| O | -6.734006 | 2.268143  | -0.012865 |
| O | -7.370134 | -2.435560 | -0.257199 |
| H | -6.890176 | -0.265567 | 1.507957  |
| O | -7.213916 | -0.560817 | 2.719965  |
| O | -8.294229 | -1.417112 | 2.613199  |
| H | -7.876717 | -2.300130 | 2.537638  |

### TS3

B3LYP SCF energy in gas phase: -2815.143313 a.u.

M06-L SCF energy in 1,4-dioxane: -2815.088909 a.u.

|   |           |           |           |
|---|-----------|-----------|-----------|
| C | 2.156861  | -0.529046 | -0.012829 |
| C | 0.964048  | 0.228091  | -0.051583 |
| C | -0.142449 | -0.632239 | -0.026186 |
| C | -1.339849 | 0.132291  | -0.064672 |
| N | 1.767560  | -1.862560 | 0.035736  |
| C | 0.341165  | -1.998634 | 0.029985  |
| O | -0.219119 | -3.090721 | 0.067181  |
| C | 2.598827  | -3.053326 | 0.085610  |
| H | 3.219680  | -3.069681 | 0.986786  |
| H | 1.912272  | -3.901743 | 0.108143  |
| H | 3.237818  | -3.131376 | -0.799458 |
| C | 3.491849  | -0.031004 | -0.020897 |
| C | 3.835738  | 1.324289  | -0.073528 |
| S | 4.950816  | -1.020970 | 0.034757  |
| C | 5.215228  | 1.557730  | -0.069728 |
| H | 3.081938  | 2.104375  | -0.112714 |
| C | 5.982666  | 0.395435  | -0.014000 |

|   |            |           |           |
|---|------------|-----------|-----------|
| H | 5.672200   | 2.537684  | -0.106081 |
| C | -2.663001  | -0.356451 | -0.056582 |
| C | -3.007867  | -1.726073 | -0.008447 |
| S | -4.125908  | 0.637161  | -0.102728 |
| C | -4.371733  | -1.960458 | -0.008797 |
| H | -2.251224  | -2.503452 | 0.023940  |
| C | -5.153562  | -0.785616 | -0.053449 |
| H | -4.837175  | -2.936807 | 0.024347  |
| N | -0.940264  | 1.467195  | -0.113061 |
| C | -1.770108  | 2.660962  | -0.164456 |
| H | -1.082761  | 3.508326  | -0.191283 |
| H | -2.393237  | 2.674972  | -1.063628 |
| H | -2.406566  | 2.742563  | 0.721662  |
| C | 0.481044   | 1.598399  | -0.107616 |
| O | 1.051725   | 2.683668  | -0.145360 |
| C | -6.560849  | -0.707031 | -0.052433 |
| C | -7.345706  | 0.465634  | -0.087431 |
| C | -7.485715  | -1.873914 | -0.002005 |
| C | -8.780910  | 0.105482  | -0.064810 |
| C | -8.871573  | -1.297330 | -0.007709 |
| C | -9.924581  | 0.896065  | -0.110793 |
| C | -10.094682 | -1.942467 | 0.014590  |
| C | -11.167323 | 0.242645  | -0.087040 |
| H | -9.864323  | 1.978006  | -0.171095 |
| C | -11.255006 | -1.150860 | -0.022277 |
| H | -10.144698 | -3.026479 | 0.055122  |
| H | -12.077729 | 0.834562  | -0.118432 |
| H | -12.231824 | -1.626032 | -0.002876 |
| C | 7.414919   | 0.306939  | 0.003482  |
| C | 8.218037   | -0.808112 | 0.058253  |
| C | 8.333218   | 1.494219  | -0.038520 |
| C | 9.648628   | -0.455911 | 0.056108  |
| C | 9.734129   | 0.945504  | -0.002752 |
| C | 10.796028  | -1.235799 | 0.099262  |
| C | 10.950944  | 1.595972  | -0.019738 |
| C | 12.040698  | -0.578903 | 0.082223  |
| H | 10.762301  | -2.322668 | 0.145016  |
| C | 12.120427  | 0.811898  | 0.023723  |
| H | 10.995166  | 2.680021  | -0.065362 |
| H | 12.952359  | -1.168342 | 0.115234  |
| H | 13.093506  | 1.293740  | 0.011696  |
| O | -6.855755  | 1.654897  | -0.174990 |
| H | -7.428413  | 2.503389  | 0.295866  |

|   |           |           |           |
|---|-----------|-----------|-----------|
| O | -7.206344 | -3.062553 | 0.042503  |
| O | 8.034104  | 2.673541  | -0.091210 |
| O | 7.750933  | -2.065913 | 0.107437  |
| H | 8.485890  | -2.699994 | 0.140986  |
| O | -7.964778 | 3.529460  | 0.896272  |
| O | -8.843520 | 4.003514  | 0.083318  |

### Int-2

B3LYP SCF energy in gas phase: -2815.164239 a.u.

M06-L SCF energy in 1,4-dioxane: -2815.098815 a.u.

|   |           |           |           |
|---|-----------|-----------|-----------|
| C | 2.159845  | -0.552098 | 0.000080  |
| C | 0.956101  | 0.200014  | 0.000047  |
| C | -0.139597 | -0.661815 | 0.000048  |
| C | -1.351093 | 0.102121  | -0.000002 |
| N | 1.776496  | -1.887356 | 0.000119  |
| C | 0.353300  | -2.029371 | 0.000090  |
| O | -0.203428 | -3.123811 | 0.000117  |
| C | 2.614334  | -3.075245 | 0.000266  |
| H | 3.244261  | -3.118108 | 0.894049  |
| H | 1.933069  | -3.928051 | 0.000419  |
| H | 3.244193  | -3.118392 | -0.893552 |
| C | 3.488008  | -0.046280 | 0.000063  |
| C | 3.823837  | 1.314367  | 0.000091  |
| S | 4.954723  | -1.028230 | -0.000050 |
| C | 5.200192  | 1.556243  | 0.000060  |
| H | 3.064620  | 2.090146  | 0.000124  |
| C | 5.976592  | 0.396958  | -0.000001 |
| H | 5.651090  | 2.539669  | 0.000090  |
| C | -2.659294 | -0.387851 | 0.000034  |
| C | -2.995416 | -1.774803 | 0.000117  |
| S | -4.134919 | 0.599594  | 0.000127  |
| C | -4.343713 | -2.022112 | 0.000113  |
| H | -2.229163 | -2.543292 | 0.000143  |
| C | -5.149829 | -0.842495 | 0.000054  |
| H | -4.806402 | -3.000660 | 0.000157  |
| N | -0.949184 | 1.441088  | -0.000060 |
| C | -1.783305 | 2.634045  | -0.000199 |
| H | -1.099536 | 3.484561  | -0.000320 |
| H | -2.413097 | 2.678829  | -0.893409 |
| H | -2.413066 | 2.679068  | 0.893021  |
| C | 0.465242  | 1.574288  | -0.000019 |
| O | 1.039473  | 2.657605  | -0.000069 |

|                                                    |            |           |           |   |            |           |           |
|----------------------------------------------------|------------|-----------|-----------|---|------------|-----------|-----------|
| C                                                  | -6.533388  | -0.780404 | -0.000021 | N | 0.903392   | 1.446148  | -0.066048 |
| C                                                  | -7.318802  | 0.447162  | -0.000104 | C | -0.520944  | 1.590179  | -0.064956 |
| C                                                  | -7.460932  | -1.935367 | 0.000032  | O | -1.076122  | 2.684574  | -0.092485 |
| C                                                  | -8.756485  | 0.056266  | -0.000085 | C | 1.742099   | 2.633869  | -0.099853 |
| C                                                  | -8.839619  | -1.346199 | 0.000013  | H | 2.367454   | 2.655091  | -0.997434 |
| C                                                  | -9.900257  | 0.849405  | -0.000294 | H | 1.060479   | 3.486145  | -0.117572 |
| C                                                  | -10.066910 | -1.994330 | -0.000047 | H | 2.376732   | 2.699286  | 0.788990  |
| C                                                  | -11.139408 | 0.195614  | -0.000368 | C | 2.614543   | -0.393511 | -0.023087 |
| H                                                  | -9.831505  | 1.935051  | -0.000509 | C | 2.947996   | -1.759701 | 0.014886  |
| C                                                  | -11.223324 | -1.203654 | -0.000224 | S | 4.077741   | 0.591866  | -0.057357 |
| H                                                  | -10.116109 | -3.079089 | 0.000022  | C | 4.316739   | -2.002339 | 0.016546  |
| H                                                  | -12.052749 | 0.784153  | -0.000576 | H | 2.187369   | -2.533439 | 0.039809  |
| H                                                  | -12.200344 | -1.679436 | -0.000286 | C | 5.099998   | -0.835277 | -0.019952 |
| C                                                  | 7.408272   | 0.319034  | -0.000028 | H | 4.774538   | -2.982448 | 0.042769  |
| C                                                  | 8.220500   | -0.791750 | -0.000090 | C | -3.539252  | -0.035179 | -0.009989 |
| C                                                  | 8.317596   | 1.514422  | 0.000029  | C | -3.865782  | 1.344195  | -0.048577 |
| C                                                  | 9.647813   | -0.428219 | -0.000092 | S | -5.006031  | -1.023047 | 0.025811  |
| C                                                  | 9.722252   | 0.975188  | -0.000026 | C | -5.221249  | 1.594565  | -0.049781 |
| C                                                  | 10.801494  | -1.200310 | -0.000142 | H | -3.098149  | 2.111063  | -0.074171 |
| C                                                  | 10.934138  | 1.635317  | -0.000014 | C | -6.022279  | 0.419553  | -0.011816 |
| C                                                  | 12.040776  | -0.533556 | -0.000127 | H | -5.681564  | 2.573960  | -0.076440 |
| H                                                  | 10.776276  | -2.288351 | -0.000191 | N | -1.828924  | -1.869709 | 0.033219  |
| C                                                  | 12.109538  | 0.859251  | -0.000065 | C | -2.666295  | -3.059639 | 0.067097  |
| H                                                  | 10.969948  | 2.720616  | 0.000036  | H | -1.983938  | -3.911166 | 0.085155  |
| H                                                  | 12.957122  | -1.116576 | -0.000166 | H | -3.292135  | -3.080733 | 0.963993  |
| H                                                  | 13.078868  | 1.348695  | -0.000055 | H | -3.300718  | -3.125252 | -0.821552 |
| O                                                  | -6.848997  | 1.596008  | -0.000033 | C | -0.406924  | -2.009896 | 0.031831  |
| H                                                  | -7.529522  | 3.167197  | 0.000655  | O | 0.154111   | -3.099912 | 0.059345  |
| O                                                  | -7.193628  | -3.130591 | 0.000056  | C | -7.407202  | 0.345111  | -0.003336 |
| O                                                  | 8.008790   | 2.692346  | 0.000066  | C | -8.181982  | -0.905431 | 0.037052  |
| O                                                  | 7.762495   | -2.053500 | -0.000146 | C | -8.346749  | 1.488771  | -0.033363 |
| H                                                  | 8.501768   | -2.683535 | -0.000188 | C | -9.624022  | -0.512320 | 0.031267  |
| O                                                  | -7.811761  | 4.128495  | 0.000605  | C | -9.719700  | 0.886770  | -0.010092 |
| O                                                  | -9.141508  | 4.104265  | -0.000127 | C | -10.760938 | -1.312009 | 0.059461  |
| <b>TS4</b>                                         |            |           |           | C | -10.955387 | 1.523210  | -0.024401 |
| B3LYP SCF energy in gas phase: -2815.151888 a.u.   |            |           |           | C | -12.007648 | -0.676115 | 0.045255  |
| M06-L SCF energy in 1,4-dioxane: -2815.095918 a.u. |            |           |           | H | -10.673293 | -2.393875 | 0.091261  |
| C                                                  | 1.285937   | 0.110173  | -0.031469 | C | -12.103523 | 0.723219  | 0.003771  |
| C                                                  | 0.086730   | -0.642317 | -0.006945 | H | -11.015727 | 2.606941  | -0.056494 |
| C                                                  | -1.014180  | 0.225219  | -0.026621 | H | -12.916179 | -1.271782 | 0.066478  |
| C                                                  | -2.216473  | -0.532804 | -0.001599 | H | -13.085013 | 1.189384  | -0.006466 |
|                                                    |            |           |           | C | 6.514934   | -0.761393 | -0.027154 |
|                                                    |            |           |           | C | 7.305181   | 0.402557  | -0.062651 |



|   |           |           |           |
|---|-----------|-----------|-----------|
| C | 7.429667  | -1.933197 | 0.007245  |
| C | 8.741870  | 0.035853  | -0.058726 |
| C | 8.821193  | -1.368179 | -0.012865 |
| C | 9.896072  | 0.812790  | -0.080786 |
| C | 10.036641 | -2.025972 | 0.013044  |
| C | 11.132683 | 0.147497  | -0.050955 |
| H | 9.849549  | 1.896938  | -0.115766 |
| C | 11.206153 | -1.246994 | -0.005706 |
| H | 10.073684 | -3.110618 | 0.047997  |
| H | 12.048986 | 0.730769  | -0.068413 |
| H | 12.177715 | -1.732682 | 0.011082  |
| O | -7.729951 | -2.046951 | 0.069054  |
| O | -8.090343 | 2.686610  | -0.069924 |
| O | 7.143983  | -3.120210 | 0.045018  |
| O | 6.810530  | 1.595498  | -0.085040 |
| H | 7.510833  | 2.438025  | -0.146685 |
| O | 8.302333  | 3.528995  | -0.243437 |
| O | 7.746718  | 4.371919  | 0.706610  |
| H | 8.273230  | 5.186488  | 0.588223  |

### 5a

B3LYP SCF energy in gas phase: -2663.661943 a.u.

M06-L SCF energy in 1,4-dioxane: -2663.589519 a.u.

|   |           |           |           |
|---|-----------|-----------|-----------|
| C | -1.752511 | -0.414395 | 0.000108  |
| C | -0.556032 | 0.400281  | 0.000185  |
| C | 0.556033  | -0.400250 | 0.000186  |
| C | 1.752513  | 0.414423  | 0.000143  |
| N | -1.289558 | -1.736231 | 0.000058  |
| C | 0.119722  | -1.806409 | 0.000109  |
| O | 0.747897  | -2.857175 | 0.000100  |
| C | -2.072650 | -2.964879 | 0.000040  |
| H | -2.699364 | -3.034464 | -0.893373 |
| H | -1.354555 | -3.786347 | 0.000021  |
| H | -2.699357 | -3.034496 | 0.893457  |
| C | -3.064644 | 0.020253  | 0.000097  |
| C | -3.456524 | 1.405718  | 0.000174  |
| S | -4.503442 | -1.025493 | -0.000011 |
| C | -4.804205 | 1.600278  | 0.000157  |
| H | -2.717635 | 2.200514  | 0.000234  |
| C | -5.572209 | 0.384314  | 0.000060  |
| H | -5.305533 | 2.559939  | 0.000210  |
| C | 3.064643  | -0.020231 | 0.000115  |

|   |            |           |           |
|---|------------|-----------|-----------|
| C | 3.456512   | -1.405699 | 0.000169  |
| S | 4.503449   | 1.025504  | -0.000004 |
| C | 4.804192   | -1.600269 | 0.000125  |
| H | 2.717617   | -2.200490 | 0.000227  |
| C | 5.572206   | -0.384311 | 0.000029  |
| H | 5.305513   | -2.559934 | 0.000156  |
| N | 1.289562   | 1.736260  | 0.000121  |
| C | 2.072656   | 2.964907  | 0.000180  |
| H | 1.354561   | 3.786376  | 0.000264  |
| H | 2.699399   | 3.034439  | 0.893577  |
| H | 2.699333   | 3.034575  | -0.893254 |
| C | -0.119719  | 1.806440  | 0.000150  |
| O | -0.747890  | 2.857208  | 0.000156  |
| C | 6.939545   | -0.268899 | -0.000033 |
| C | 7.672193   | 1.010637  | -0.000130 |
| C | 7.921750   | -1.381333 | -0.000010 |
| C | 9.125746   | 0.667289  | -0.000170 |
| C | 9.270546   | -0.728405 | -0.000101 |
| C | 10.234392  | 1.507006  | -0.000259 |
| C | 10.528459  | -1.321199 | -0.000120 |
| C | 11.502047  | 0.915027  | -0.000278 |
| H | 10.109147  | 2.585580  | -0.000311 |
| C | 11.647185  | -0.481050 | -0.000209 |
| H | 10.626942  | -2.402578 | -0.000066 |
| H | 12.389155  | 1.542426  | -0.000347 |
| H | 12.644472  | -0.912359 | -0.000226 |
| C | -6.939548  | 0.268891  | 0.000025  |
| C | -7.672186  | -1.010650 | -0.000070 |
| C | -7.921761  | 1.381318  | 0.000093  |
| C | -9.125742  | -0.667313 | -0.000121 |
| C | -9.270552  | 0.728380  | -0.000047 |
| C | -10.234381 | -1.507038 | -0.000236 |
| C | -10.528469 | 1.321164  | -0.000093 |
| C | -11.502041 | -0.915069 | -0.000278 |
| H | -10.109129 | -2.585612 | -0.000294 |
| C | -11.647189 | 0.481007  | -0.000208 |
| H | -10.626961 | 2.402542  | -0.000032 |
| H | -12.389144 | -1.542475 | -0.000369 |
| H | -12.644480 | 0.912309  | -0.000243 |
| O | 7.178125   | 2.133982  | -0.000171 |
| O | 7.709019   | -2.586996 | 0.000055  |
| O | -7.709039  | 2.586983  | 0.000077  |
| O | -7.178110  | -2.133991 | -0.000135 |



## 9. References

1. Lee, C.; Yang, W.; Parr, R. G., Development of the Colle-Salvetti correlation-energy formula into a functional of the electron density. *Physical Review B* **1988**, *37* (2), 785-789.
2. Becke, A. D., Density-functional thermochemistry. III. The role of exact exchange. **1993**, *98* (7), 5648-5652.
3. Andrae, D.; Häußermann, U.; Dolg, M.; Stoll, H.; Preuß, H., Energy-adjusted ab initio pseudopotentials for the second and third row transition elements. *Theoretica chimica acta* **1990**, *77* (2), 123-141.
4. Roy, L. E.; Hay, P. J.; Martin, R. L., Revised Basis Sets for the LANL Effective Core Potentials. *Journal of Chemical Theory and Computation* **2008**, *4* (7), 1029-1031.
5. Zhao, Y.; Truhlar, D. G., The M06 suite of density functionals for main group thermochemistry, thermochemical kinetics, noncovalent interactions, excited states, and transition elements: two new functionals and systematic testing of four M06-class functionals and 12 other functionals. *Theor. Chem. Acc.* **2008**, *120* (1), 215-241.
6. Zhao, Y.; Truhlar, D. G., Density Functionals with Broad Applicability in Chemistry. *Accounts of Chemical Research* **2008**, *41* (2), 157-167.
7. Marenich, A. V.; Cramer, C. J.; Truhlar, D. G., Universal Solvation Model Based on Solute Electron Density and on a Continuum Model of the Solvent Defined by the

Bulk Dielectric Constant and Atomic Surface Tensions. *The Journal of Physical Chemistry B* **2009**, *113* (18), 6378-6396.

8. Liu, P.; Xu, X.; Dong, X.; Keitz, B. K.; Herbert, M. B.; Grubbs, R. H.; Houk, K. N., Z-Selectivity in Olefin Metathesis with Chelated Ru Catalysts: Computational Studies of Mechanism and Selectivity. *J. Am. Chem. Soc.* **2012**, *134* (3), 1464-1467.

9. Herbert, M. B.; Lan, Y.; Keitz, B. K.; Liu, P.; Endo, K.; Day, M. W.; Houk, K. N.; Grubbs, R. H., Decomposition Pathways of Z-Selective Ruthenium Metathesis Catalysts. *J. Am. Chem. Soc.* **2012**, *134* (18), 7861-7866.

10. Giri, R.; Lan, Y.; Liu, P.; Houk, K. N.; Yu, J.-Q., Understanding Reactivity and Stereoselectivity in Palladium-Catalyzed Diastereoselective sp<sup>3</sup> C–H Bond Activation: Intermediate Characterization and Computational Studies. *J. Am. Chem. Soc.* **2012**, *134* (34), 14118-14126.

11. Miyazaki, H.; Herbert, M. B.; Liu, P.; Dong, X.; Xu, X.; Keitz, B. K.; Ung, T.; Mkrtumyan, G.; Houk, K. N.; Grubbs, R. H., Z-Selective Ethenolysis with a Ruthenium Metathesis Catalyst: Experiment and Theory. *J. Am. Chem. Soc.* **2013**, *135* (15), 5848-5858.

12. Xu, X.; Liu, P.; Shu, X.-z.; Tang, W.; Houk, K. N., Rh-Catalyzed (5+2) Cycloadditions of 3-Acyloxy-1,4-enynes and Alkynes: Computational Study of Mechanism, Reactivity, and Regioselectivity. *J. Am. Chem. Soc.* **2013**, *135* (25), 9271-9274.

13. Cannon, J. S.; Zou, L.; Liu, P.; Lan, Y.; O'Leary, D. J.; Houk, K. N.; Grubbs, R.

H., Carboxylate-Assisted C(sp<sup>3</sup>)-H Activation in Olefin Metathesis-Relevant Ruthenium Complexes. *J. Am. Chem. Soc.* **2014**, *136* (18), 6733-6743.

14. Haynes, M. T.; Liu, P.; Baxter, R. D.; Nett, A. J.; Houk, K. N.; Montgomery, J., Dimer Involvement and Origin of Crossover in Nickel-Catalyzed Aldehyde-Alkyne Reductive Couplings. *J. Am. Chem. Soc.* **2014**, *136* (50), 17495-17504.

15. Lu, G.; Fang, C.; Xu, T.; Dong, G.; Liu, P., Computational Study of Rh-Catalyzed Carboacylation of Olefins: Ligand-Promoted Rhodacycle Isomerization Enables Regioselective C-C Bond Functionalization of Benzocyclobutenones. *J. Am. Chem. Soc.* **2015**, *137* (25), 8274-8283.

16. Dang, Y.; Qu, S.; Wang, Z.-X.; Wang, X., A Computational Mechanistic Study of an Unprecedented Heck-Type Relay Reaction: Insight into the Origins of Regio- and Enantioselectivities. *J. Am. Chem. Soc.* **2014**, *136* (3), 986-998.

17. Dang, Y.; Deng, X.; Guo, J.; Song, C.; Hu, W.; Wang, Z.-X., Unveiling Secrets of Overcoming the "Heteroatom Problem" in Palladium-Catalyzed Aerobic C-H Functionalization of Heterocycles: A DFT Mechanistic Study. *J. Am. Chem. Soc.* **2016**, *138* (8), 2712-2723.

18. Frisch, M. J.; Trucks, G. W.; Schlegel, H. B. et al. Gaussian 09; Gaussian, Inc.: Wallingford, CT, 2009.

19. Zou, Y.; Gendron, D.; Badrou-Aïch, R.; Najari, A.; Tao, Y.; Leclerc, M., A High-Mobility Low-Bandgap Poly(2,7-carbazole) Derivative for Photovoltaic Applications. *Macromolecules* **2009**, *42* (8), 2891-2894.

20. Li, Y.; Li, H.; Chen, H.; Wan, Y.; Li, N.; Xu, Q.; He, J.; Chen, D.; Wang, L.; Lu, J., Controlling Crystallite Orientation of Diketopyrrolopyrrole-Based Small Molecules in Thin Films for Highly Reproducible Multilevel Memory Device: Role of Furan Substitution. *Advanced Functional Materials* **2015**, *25* (27), 4246-4254.
21. Dou, L.; Chang, W.-H.; Gao, J.; Chen, C.-C.; You, J.; Yang, Y., A Selenium-Substituted Low-Bandgap Polymer with Versatile Photovoltaic Applications. *Advanced Materials* **2013**, *25* (6), 825-831.
